# Supplementary material for: The Updated AJCC/TNM Staging System for Papillary Thyroid Cancer (8th Edition): From the Perspective of Genomic Analysis
Source: Springer Nature journal article supplement (doi:10.1007/s00268-018-4662-2), 2018-05-10
Supplement: MOESM1 [file 15753782]

## Sheet: 1_Thyroid_TCGA_505cases_clinica
sampleID	GENE_ID	BRAF	HRAS	NRAS	order	_EVENT	_OS	_OS_IND	RFS	Recur	_TIME_TO_EVENT	age_at_initial_pathologic_diagnosis	age_55	age	age_45	age1	age2	braf_gene_genotyping_outcome_lab_results_text	days_to_additional_surgery_metastatic_procedure	days_to_birth	days_to_collection	days_to_death	days_to_initial_pathologic_diagnosis	days_to_last_followup	days_to_new_tumor_event_additional_surgery_procedure	days_to_new_tumor_event_after_initial_treatment	extrathyroid_carcinoma_present_extension_status	ETE	first_degree_relative_history_thyrd_glnd_crcnm_dgnss_rltnshp_typ	followup_case_report_form_submission_reason	form_completion_date	gender	genotype_analysis_performed_indicator	genotyping_results_gene_mutation_not_reported_reason	histologic_disease_progression_present_indicator	histologic_disease_progression_present_type	histological_type	Histology	histological_type_other	history_of_neoadjuvant_treatment	i_131_first_administered_dose	i_131_subsequent_administered_dose	i_131_total_administered_dose	i_131_total_administered_preparation_technique	icd_10	icd_o_3_histology	icd_o_3_site	informed_consent_verified	initial_weight
TCGA-4C-A93U-01	TCGA-4C-A93U-01	NA	NA	NA	1	0	129	0	129	0	129	74	>=55	>=55	>=45	over55	over45			-27348	75		0	129			Moderate/Advanced (T4a)	Gross			2014-11-12	FEMALE					Thyroid Papillary Carcinoma	Classical/usual		No					C73	8050/3	C73.9	YES	800
TCGA-BJ-A0YZ-01	TCGA-BJ-A0YZ-01	NA	NA	NA	2	0	754	0	754	0	754	65	>=55	>=55	>=45	over55	over45			-24102	334		0	754			None	None		Scheduled Follow-up Submission	2011-12-12	MALE					Thyroid Papillary Carcinoma	Classical/usual		No					C73	8260/3	C73.9	YES	380
TCGA-BJ-A0Z0-01	TCGA-BJ-A0Z0-01	NA	NA	NA	3	0	419	0	419	0	419	55	>=55	>=55	>=45	over55	over45			-20361	183		0	419			None	None		Scheduled Follow-up Submission	2011-12-12	MALE					Thyroid Papillary Carcinoma	Classical/usual		No	51.0 MCI			Thyroxine withdrawal	C73	8260/3	C73.9	YES	360
TCGA-BJ-A0Z2-01	TCGA-BJ-A0Z2-01	NA	Q61R	NA	4	0	554	0	158	1	554	57	>=55	>=55	>=45	over55	over45		232	-21008	169		0	554		158	None	None	Parent	Scheduled Follow-up Submission	2011-12-08	MALE			YES		Thyroid Papillary Carcinoma	Follicular (>= 99% follicular patterned)		No					C73	8330/3	C73.9	YES	430
TCGA-BJ-A0Z3-01	TCGA-BJ-A0Z3-01	V600E	NA	NA	5	0	497	0	497	0	497	33	<55	<45	<45	lessthan55	lessthan45	V600E identified		-12295	162		0	497			None	None		Scheduled Follow-up Submission	2011-12-12	FEMALE	YES				Thyroid Papillary Carcinoma	Classical/usual		No	73.3 MCI			Thyroxine withdrawal	C73	8260/3	C73.9	YES	390
TCGA-BJ-A0Z5-01	TCGA-BJ-A0Z5-01	NA	NA	NA	6	0	448	0	448	0	448	58	>=55	>=55	>=45	over55	over45	V600E identified		-21369	168		0	448						Scheduled Follow-up Submission	2011-12-12	MALE	YES				Thyroid Papillary Carcinoma	Classical/usual		No	150.7 MCI			Thyroxine withdrawal	C73	8260/3	C73.9	YES	520
TCGA-BJ-A0Z9-01	TCGA-BJ-A0Z9-01	V600E	NA	NA	7	0	251	0	251	0	251	57	>=55	>=55	>=45	over55	over45			-21061	152		0	251			Minimal (T3)	Microscopic		Scheduled Follow-up Submission	2011-12-12	FEMALE					Thyroid Papillary Carcinoma	Tall Cell (>= 50% tall cell features)		No					C73	8344/3	C73.9	YES	370
TCGA-BJ-A0ZA-01	TCGA-BJ-A0ZA-01	NA	NA	Q61R	8	0	574	0	574	0	574	67	>=55	>=55	>=45	over55	over45			-24528	174		0	574			None	None		Scheduled Follow-up Submission	2011-12-12	FEMALE	YES	No BRAF Mutation DetectedNo RET/PTC Rearrangement Detected			Thyroid Papillary Carcinoma	Classical/usual		No	51.3			Thyroxine withdrawal	C73	8260/3	C73.9	YES	320
TCGA-BJ-A0ZB-01	TCGA-BJ-A0ZB-01	V600E	NA	NA	9	0	122	0	122	0	122	66	>=55	>=55	>=45	over55	over45	V600E		-24415	162		0	122			Moderate/Advanced (T4a)	Gross		Scheduled Follow-up Submission	2011-12-12	MALE	YES	|No RAS Mutation Detected|No RET/PTC Rearrangement Detected			Thyroid Papillary Carcinoma	Classical/usual		No	39.5 MCI			Thyroxine withdrawal	C73	8260/3	C73.9	YES	250
TCGA-BJ-A0ZC-01	TCGA-BJ-A0ZC-01	NA	NA	NA	10	0	352	0	352	0	352	55	>=55	>=55	>=45	over55	over45			-20282	128		0	352			None	None		Scheduled Follow-up Submission	2011-12-12	MALE	YES	No BRAF Mutation Detected|No RAS Mutation Detected|No RET/PTC Rearrangement Detected			Thyroid Papillary Carcinoma	Classical/usual		No					C73	8260/3	C73.9	YES	580
TCGA-BJ-A0ZE-01	TCGA-BJ-A0ZE-01	NA	NA	NA	11	0	509	0	509	0	509	63	>=55	>=55	>=45	over55	over45			-23250	96		0	509			Minimal (T3)	Microscopic		Scheduled Follow-up Submission	2011-12-12	FEMALE	YES	No BRAF Mutation Detected|No RAS Mutation Detected|No RET/PTC Rearrangement Detected			Thyroid Papillary Carcinoma	Classical/usual		No	155.6 MCI			Thyroxine withdrawal	C73	8260/3	C73.9	YES	320
TCGA-BJ-A0ZF-01	TCGA-BJ-A0ZF-01	NA	NA	NA	12	0	512	0	512	0	512	54	<55	45~54	>=45	lessthan55	over45			-19978	118		0	512			None	None		Scheduled Follow-up Submission	2011-12-08	FEMALE	YES	No BRAF Mutation Detected|No RAS Mutation Detected|No RET/PTC Rearrangement Detected			Other specify		Follicular Carcinoma	No					C73	8335/3	C73.9	YES	270
TCGA-BJ-A0ZG-01	TCGA-BJ-A0ZG-01	NA	NA	NA	13	0	230	0	230	0	230	80	>=55	>=55	>=45	over55	over45	p. V600E, c.1799T >A		-29375	68		0	230			None	None		Scheduled Follow-up Submission	2011-12-12	MALE	YES	|No RAS Mutation Detected|No RET/PTC Rearrangement Detected			Thyroid Papillary Carcinoma	Follicular (>= 99% follicular patterned)		No					C73	8340/3	C73.9	YES	210
TCGA-BJ-A0ZH-01	TCGA-BJ-A0ZH-01	V600E	NA	NA	14	0	460	0	460	0	460	52	<55	45~54	>=45	lessthan55	over45	V600E identified		-19114	89		0	460			None	None		Scheduled Follow-up Submission	2011-12-12	FEMALE	YES				Thyroid Papillary Carcinoma	Tall Cell (>= 50% tall cell features)		No					C73	8344/3	C73.9	YES	90
TCGA-BJ-A0ZJ-01	TCGA-BJ-A0ZJ-01	NA	NA	NA	15	0	538	0	538	0	538	36	<55	<45	<45	lessthan55	lessthan45	not identified		-13149	124		0	538			None	None		Scheduled Follow-up Submission	2011-12-12	MALE					Thyroid Papillary Carcinoma	Classical/usual		No				Thyroxine withdrawal	C73	8260/3	C73.9	YES	270
TCGA-BJ-A18Y-01	TCGA-BJ-A18Y-01	NA	Q61K	NA	16	0	710	0	710	0	710	29	<55	<45	<45	lessthan55	lessthan45	not identified		-10832	163		0	710			None	None			2012-07-29	MALE	YES				Thyroid Papillary Carcinoma	Classical/usual		No					C73	8260/3	C73.9	YES	100
TCGA-BJ-A18Z-01	TCGA-BJ-A18Z-01	V600E	NA	NA	17	0	630	0	630	0	630	58	>=55	>=55	>=45	over55	over45	pV600E, c.199T>A identified		-21519	87		0	630			Minimal (T3)	Microscopic			2012-07-29	MALE	YES	|No RAS Mutation Detected|No RET/PTC Rearrangement Detected			Thyroid Papillary Carcinoma	Classical/usual		No			159	rhTSH	C73	8260/3	C73.9	YES	300
TCGA-BJ-A190-01	TCGA-BJ-A190-01	NA	NA	NA	18	0	626	0	626	0	626	55	>=55	>=55	>=45	over55	over45	not identified		-20407	55		0	626			None	None			2012-07-29	MALE	YES				Thyroid Papillary Carcinoma	Classical/usual		No					C73	8260/3	C73.9	YES	540
TCGA-BJ-A191-01	TCGA-BJ-A191-01	NA	NA	NA	19	0	147	0	147	0	147	49	<55	45~54	>=45	lessthan55	over45	not identified		-18162	30		0	147			None	None			2012-07-29	FEMALE	YES				Other specify		columnar cell variant	No				rhTSH	C73	8344/3	C73.9	YES	340
TCGA-BJ-A192-01	TCGA-BJ-A192-01	NA	NA	NA	20	0	1349	0	1349	0	1349	54	<55	45~54	>=45	lessthan55	over45	not identified		-19878	154		0	1349			Minimal (T3)	Microscopic			2014-09-05	FEMALE	NO				Thyroid Papillary Carcinoma	Classical/usual		No					C73	8290/3	C73.9	YES	230
TCGA-BJ-A28R-01	TCGA-BJ-A28R-01	V600E	NA	NA	21	0	1282	0	1282	0	1282	38	<55	<45	<45	lessthan55	lessthan45			-14044	205		0	1282							2014-09-05	FEMALE					Thyroid Papillary Carcinoma	Classical/usual		No					C73	8260/3	C73.9	YES	190
TCGA-BJ-A28S-01	TCGA-BJ-A28S-01	N581_A598dup	NA	NA	22	0	640	0	640	0	640	79	>=55	>=55	>=45	over55	over45			-29143	150		0	640							2013-07-22	MALE					Thyroid Papillary Carcinoma	Classical/usual		No					C73	8260/3	C73.9	YES	170
TCGA-BJ-A28T-01	TCGA-BJ-A28T-01	NA	NA	NA	23	0	1081	0	1081	0	1081	34	<55	<45	<45	lessthan55	lessthan45			-12698	100		0	1081							2014-09-05	FEMALE					Thyroid Papillary Carcinoma	Classical/usual		No					C73	8260/3	C73.9	YES	140
TCGA-BJ-A28V-01	TCGA-BJ-A28V-01	NA	NA	NA	24	0	155	0			155	79	>=55	>=55	>=45	over55	over45			-29143	227		0	155							2011-10-05	FEMALE					Thyroid Papillary Carcinoma	Classical/usual		No					C73	8260/3	C73.9	YES	280
TCGA-BJ-A28W-01	TCGA-BJ-A28W-01	NA	NA	NA	25	0	344	0	344	0	344	32	<55	<45	<45	lessthan55	lessthan45	p.V600E, c.1799T>A		-11999	105		0	344							2013-07-22	FEMALE	YES				Thyroid Papillary Carcinoma	Classical/usual		No					C73	8260/3	C73.9	YES	160
TCGA-BJ-A28X-01	TCGA-BJ-A28X-01	V600E	NA	NA	26	0	533	0			533	32	<55	<45	<45	lessthan55	lessthan45			-11735	161		0	533			Minimal (T3)	Microscopic			2012-07-03	FEMALE	NO				Thyroid Papillary Carcinoma	Tall Cell (>= 50% tall cell features)		No	152				C73	8344/3	C73.9	YES	170
TCGA-BJ-A28Z-01	TCGA-BJ-A28Z-01	NA	NA	NA	27	0	37	0			37	46	<55	45~54	>=45	lessthan55	over45			-16912	50		0	37			Minimal (T3)	Microscopic			2011-10-05	FEMALE	YES	No BRAF Mutation Detected|No RAS Mutation Detected|No RET/PTC Rearrangement Detected			Thyroid Papillary Carcinoma	Classical/usual		No					C73	8260/3	C73.9	YES	130
TCGA-BJ-A290-01	TCGA-BJ-A290-01	V600E	NA	NA	28	0	919	0	329	1	919	70	>=55	>=55	>=45	over55	over45	V600E identified		-25803	486		0	919		329	Minimal (T3)	Microscopic			2013-07-22	MALE	YES		YES		Thyroid Papillary Carcinoma	Tall Cell (>= 50% tall cell features)		No	98			Thyroxine withdrawal	C73	8344/3	C73.9	YES	440
TCGA-BJ-A291-01	TCGA-BJ-A291-01	NA	NA	NA	29	0	696	0	696	0	696	56	>=55	>=55	>=45	over55	over45			-20682	380		0	696					Parent		2013-07-24	FEMALE					Thyroid Papillary Carcinoma	Classical/usual		No					C73	8260/3	C73.9	YES	150
TCGA-BJ-A2N7-01	TCGA-BJ-A2N7-01	NA	NA	Q61R	30	0	559	0	559	0	559	30	<55	<45	<45	lessthan55	lessthan45			-11188	141		0	559			Minimal (T3)	Microscopic			2013-07-25	FEMALE	NO				Thyroid Papillary Carcinoma	Classical/usual		No					C73	8260/3	C73.9	YES	100
TCGA-BJ-A2N8-01	TCGA-BJ-A2N8-01	NA	NA	Q61R	31	0	504	0	504	0	504	30	<55	<45	<45	lessthan55	lessthan45			-11024	103		0	504							2013-07-26	FEMALE	NO				Thyroid Papillary Carcinoma	Classical/usual		No					C73	8260/3	C73.9	YES	80
TCGA-BJ-A2N9-01	TCGA-BJ-A2N9-01	NA	NA	NA	32	0	623	0	225	1	623	42	<55	<45	<45	lessthan55	lessthan45			-15411	97		0	623		225	None	None			2013-07-26	FEMALE	YES	No BRAF Mutation Detected|No RAS Mutation Detected|No RET/PTC Rearrangement Detected			Thyroid Papillary Carcinoma	Classical/usual		No					C73	8260/3	C73.9	YES	220
TCGA-BJ-A2NA-01	TCGA-BJ-A2NA-01	V600E	NA	NA	33	0	577	0	127	1	577	77	>=55	>=55	>=45	over55	over45			-28147	148		0	577		127	Minimal (T3)	Microscopic			2013-07-26	MALE	NO				Thyroid Papillary Carcinoma	Classical/usual		No					C73	8260/3	C73.9	YES	240
TCGA-BJ-A2P4-01	TCGA-BJ-A2P4-01	NA	Q61R	NA	34	0	214	0			214	29	<55	<45	<45	lessthan55	lessthan45			-10602	201		0	214							2012-01-31	FEMALE					Thyroid Papillary Carcinoma	Classical/usual		No					C73	8260/3	C73.9	YES	210
TCGA-BJ-A3EZ-01	TCGA-BJ-A3EZ-01	V600E	NA	NA	35	0	487	0	487	0	487	51	<55	45~54	>=45	lessthan55	over45			-18882	91		0	487			Minimal (T3)	Microscopic			2013-07-26	MALE	NO				Thyroid Papillary Carcinoma	Classical/usual		No					C73	8260/3	C73.9	YES	90
TCGA-BJ-A3F0-01	TCGA-BJ-A3F0-01	NA	NA	NA	36	0	424	0	424	0	424	64	>=55	>=55	>=45	over55	over45			-23545	49		0	424			None	None			2013-07-26	FEMALE	NO				Thyroid Papillary Carcinoma	Classical/usual		No					C73	8260/3	C73.9	YES	180
TCGA-BJ-A3PR-01	TCGA-BJ-A3PR-01	V600E	NA	NA	37	0	471	0	471	0	471	69	>=55	>=55	>=45	over55	over45			-25565	204		0	471			None	None			2013-07-26	FEMALE	NO				Thyroid Papillary Carcinoma	Classical/usual		No					C73	8260/3	C73.9	YES	210
TCGA-BJ-A3PT-01	TCGA-BJ-A3PT-01	NA	NA	Q61R	38	0	709	0	709	0	709	51	<55	45~54	>=45	lessthan55	over45			-18903	255		0	709							2013-07-26	FEMALE					Thyroid Papillary Carcinoma	Classical/usual		No					C73	8260/3	C73.9	YES	210
TCGA-BJ-A3PU-01	TCGA-BJ-A3PU-01	V600E	NA	NA	39	0	567	0	567	0	567	52	<55	45~54	>=45	lessthan55	over45			-19007	168		0	567			Minimal (T3)	Microscopic			2013-07-26	MALE					Thyroid Papillary Carcinoma	Classical/usual		No					C73	8260/3	C73.9	YES	590
TCGA-BJ-A45C-01	TCGA-BJ-A45C-01	NA	NA	NA	40	0	175	0	175	0	175	78	>=55	>=55	>=45	over55	over45			-28490	198		0	175			Minimal (T3)	Microscopic			2013-01-10	MALE					Thyroid Papillary Carcinoma	Classical/usual		No					C73	8260/3	C73.9	YES	180
TCGA-BJ-A45D-01	TCGA-BJ-A45D-01	NA	Q61R	NA	41	0	331	0	331	0	331	36	<55	<45	<45	lessthan55	lessthan45			-13335	100		0	331			None	None			2014-09-04	MALE					Thyroid Papillary Carcinoma	Follicular (>= 99% follicular patterned)		No					C73	8340/3	C73.9	YES	200
TCGA-BJ-A45E-01	TCGA-BJ-A45E-01	NA	NA	NA	42	0	1	0	1	0	1	46	<55	45~54	>=45	lessthan55	over45			-17115	100		0	1							2013-01-15	FEMALE	YES	No BRAF Mutation Detected|No RAS Mutation Detected|No RET/PTC Rearrangement Detected			Thyroid Papillary Carcinoma	Classical/usual		No					C73	8260/3	C73.9	YES	40
TCGA-BJ-A45F-01	TCGA-BJ-A45F-01	NA	NA	Q61R	43	0	105	0	105	0	105	59	>=55	>=55	>=45	over55	over45	Negative		-21713	99		0	105							2013-01-15	FEMALE	YES				Thyroid Papillary Carcinoma	Classical/usual		No					C73	8260/3	C73.9	YES	170
TCGA-BJ-A45G-01	TCGA-BJ-A45G-01	NA	NA	Q61R	44	0	193	0	193	0	193	48	<55	45~54	>=45	lessthan55	over45			-17831	136		0	193			None	None			2013-01-10	FEMALE					Thyroid Papillary Carcinoma	Follicular (>= 99% follicular patterned)		No	101			Thyroxine withdrawal	C73	8340/3	C73.9	YES	240
TCGA-BJ-A45H-01	TCGA-BJ-A45H-01	NA	NA	NA	45	0	238	0	238	0	238	45	<55	45~54	>=45	lessthan55	over45	600 (pV600E, c1799T>A		-16541	160		0	238			Minimal (T3)	Microscopic			2013-01-14	MALE	YES				Thyroid Papillary Carcinoma	Classical/usual		No	152.1				C73	8260/3	C73.9	YES	160
TCGA-BJ-A45I-01	TCGA-BJ-A45I-01	V600E	NA	NA	46	0	188	0	188	0	188	51	<55	45~54	>=45	lessthan55	over45	positive		-18767	161		0	188			Minimal (T3)	Microscopic			2013-01-15	FEMALE	YES				Thyroid Papillary Carcinoma	Tall Cell (>= 50% tall cell features)		No	101.7			rhTSH	C73	8344/3	C73.9	YES	60
TCGA-BJ-A45J-01	TCGA-BJ-A45J-01	V600E	NA	NA	47	0	154	0	154	0	154	39	<55	<45	<45	lessthan55	lessthan45	V600E		-14510	154		0	154							2013-01-15	FEMALE	YES				Thyroid Papillary Carcinoma	Tall Cell (>= 50% tall cell features)		No	151			rhTSH	C73	8344/3	C73.9	YES	160
TCGA-BJ-A45K-01	TCGA-BJ-A45K-01	NA	NA	NA	48	0	273	0	273	0	273	33	<55	<45	<45	lessthan55	lessthan45			-12138	126		0	273			None	None			2013-01-15	MALE	YES	No BRAF Mutation Detected|No RAS Mutation Detected|No RET/PTC Rearrangement Detected			Thyroid Papillary Carcinoma	Follicular (>= 99% follicular patterned)		No					C73	8340/3	C73.9	YES	230
TCGA-BJ-A4O8-01	TCGA-BJ-A4O8-01	V600E	NA	NA	49	0	150	0	150	0	150	47	<55	45~54	>=45	lessthan55	over45	(p.V600E, c.1799T>A)		-17430	79		0	150			None	None			2013-01-28	MALE					Thyroid Papillary Carcinoma	Classical/usual		No	150			Thyroxine withdrawal	C73	8260/3	C73.9	YES	160
TCGA-BJ-A4O9-01	TCGA-BJ-A4O9-01	V600E	NA	NA	50	0	714	0	714	0	714	51	<55	45~54	>=45	lessthan55	over45	(pV600E, c.1799)		-18938	209		0	714			None	None			2014-09-04	FEMALE	YES				Other specify		encapsulated follicular	No					C73	8340/3	C73.9	YES	100
TCGA-CE-A13K-01	TCGA-CE-A13K-01	NA	NA	NA	51	0	16	0			16	30	<55	<45	<45	lessthan55	lessthan45			-11122	75		0	16			Minimal (T3)	Microscopic			2011-06-16	FEMALE					Thyroid Papillary Carcinoma	Classical/usual		No					C73	8260/3	C73.9	YES	620
TCGA-CE-A27D-01	TCGA-CE-A27D-01	NA	NA	NA	52	0	3	0			3	28	<55	<45	<45	lessthan55	lessthan45			-10536	135		0	3			None	None			2011-07-21	FEMALE					Thyroid Papillary Carcinoma	Classical/usual		No					C73	8260/3	C73.9	YES	280
TCGA-CE-A3MD-01	TCGA-CE-A3MD-01	NA	NA	NA	53	0	6	0			6	31	<55	<45	<45	lessthan55	lessthan45			-11399	235		0	6			None	None			2012-03-06	MALE					Thyroid Papillary Carcinoma	Classical/usual		No					C73	8260/3	C73.9	YES	270
TCGA-CE-A3ME-01	TCGA-CE-A3ME-01	V600E	NA	NA	54	0	7	0			7	51	<55	45~54	>=45	lessthan55	over45			-18714	158		0	7			None	None			2012-03-06	FEMALE					Thyroid Papillary Carcinoma	Classical/usual		No					C73	8260/3	C73.9	YES	250
TCGA-CE-A481-01	TCGA-CE-A481-01	NA	NA	NA	55	0	346	0	346	0	346	41	<55	<45	<45	lessthan55	lessthan45			-15268	269		0	346			None	None			2014-03-31	FEMALE					Thyroid Papillary Carcinoma	Classical/usual		No				Patient did not receive I-131 treatment	C73	8260/3	C73.9	YES	330
TCGA-CE-A482-01	TCGA-CE-A482-01	NA	NA	NA	56	0	325	0	325	0	325	27	<55	<45	<45	lessthan55	lessthan45			-10192	263		0	325			None	None			2014-03-31	FEMALE					Thyroid Papillary Carcinoma	Classical/usual		No				Patient did not receive I-131 treatment	C73	8260/3	C73.9	YES	410
TCGA-CE-A483-01	TCGA-CE-A483-01	NA	NA	NA	57	0	3	0	3	0	3	34	<55	<45	<45	lessthan55	lessthan45			-12768	143		0	3			None	None			2013-03-07	FEMALE					Thyroid Papillary Carcinoma	Classical/usual		No					C73	8260/3	C73.9	YES	360
TCGA-CE-A484-01	TCGA-CE-A484-01	NA	NA	NA	58	0	12	0	12	0	12	37	<55	<45	<45	lessthan55	lessthan45			-13815	135		0	12			None	None			2013-03-07	FEMALE					Thyroid Papillary Carcinoma	Classical/usual		No					C73	8260/3	C73.9	YES	430
TCGA-CE-A485-01	TCGA-CE-A485-01	NA	NA	NA	59	0	3	0	3	0	3	32	<55	<45	<45	lessthan55	lessthan45			-11997	132		0	3			None	None			2013-03-07	MALE	NO				Thyroid Papillary Carcinoma	Classical/usual		No					C73	8260/3	C73.9	YES	410
TCGA-DE-A0XZ-01	TCGA-DE-A0XZ-01	V600E	NA	NA	60	0	615	0	204	1	615	65	>=55	>=55	>=45	over55	over45			-24020	377		0	615		204	None	None		Scheduled Follow-up Submission	2010-12-15	FEMALE					Thyroid Papillary Carcinoma	Classical/usual		No	150mCi		150mCi	Thyroxine withdrawal	C73	8260/3	C73.9	YES	50
TCGA-DE-A0Y2-01	TCGA-DE-A0Y2-01	Fusion	NA	NA	61	0	469	0	469	0	469	30	<55	<45	<45	lessthan55	lessthan45			-11227	188		0	469			None	None		Scheduled Follow-up Submission	2010-12-15	FEMALE					Thyroid Papillary Carcinoma	Classical/usual		No	150mCi		150mCi	Thyroxine withdrawal	C73	8260/3	C73.9	YES	190
TCGA-DE-A0Y3-01	TCGA-DE-A0Y3-01	V600E	NA	NA	62	0	1109	0	1109	0	1109	60	>=55	>=55	>=45	over55	over45			-22239	885		0	1109						Scheduled Follow-up Submission	2010-12-15	FEMALE					Thyroid Papillary Carcinoma	Classical/usual		No	150mCi		150mCi	Thyroxine withdrawal	C73	8260/3	C73.9	YES	20
TCGA-DE-A2OL-01	TCGA-DE-A2OL-01	NA	NA	NA	63	0	182	0	182	0	182	44	<55	<45	<45	lessthan55	lessthan45			-16253	102		0	182			None	None		Scheduled Follow-up Submission	2011-11-14	FEMALE	NO				Thyroid Papillary Carcinoma	Follicular (>= 99% follicular patterned)		No	50mCi		50mCi	Thyroxine withdrawal	C73	8340/3	C73.9	YES	210
TCGA-DE-A3KN-01	TCGA-DE-A3KN-01	NA	NA	NA	64	0	482	0	482	0	482	49	<55	45~54	>=45	lessthan55	over45			-18098	183		0	482			Minimal (T3)	Microscopic			2012-12-11	FEMALE	NO				Thyroid Papillary Carcinoma	Classical/usual		No	175 mCi		175 mCi	Thyroxine withdrawal	C73	8260/3	C73.9	YES	200
TCGA-DE-A4M8-01	TCGA-DE-A4M8-01	NA	NA	NA	65	0	564	0	564	0	564	61	>=55	>=55	>=45	over55	over45			-22357	104		0	564			None	None	Parent		2014-01-15	FEMALE					Thyroid Papillary Carcinoma	Classical/usual		No	153 mCi		153 mCi	Thyroxine withdrawal	C73	8260/3	C73.9	YES	300
TCGA-DE-A4M9-01	TCGA-DE-A4M9-01	NA	NA	NA	66	0	573	0	573	0	573	28	<55	<45	<45	lessthan55	lessthan45			-10384	43		0	573			None	None			2014-03-17	MALE					Thyroid Papillary Carcinoma	Classical/usual		No	75 mCi		75 mCi	Thyroxine withdrawal	C73	8260/3	C73.9	YES	200
TCGA-DE-A4MA-01	TCGA-DE-A4MA-01	NA	NA	NA	67	0	916	0	916	0	916	52	<55	45~54	>=45	lessthan55	over45			-19100	527		0	916			Minimal (T3)	Microscopic			2013-10-29	FEMALE					Thyroid Papillary Carcinoma	Classical/usual		No	152 mCi	none	152 mCi	Thyroxine withdrawal	C73	8260/3	C73.9	YES	180
TCGA-DE-A4MB-01	TCGA-DE-A4MB-01	NA	NA	NA	68	0	352	0	352	0	352	79	>=55	>=55	>=45	over55	over45			-29011	478		0	352			Minimal (T3)	Microscopic			2013-10-29	FEMALE					Thyroid Papillary Carcinoma	Classical/usual		No	33 mCi	150 mCi	183 mCi	Thyroxine withdrawal	C73	8260/3	C73.9	YES	250
TCGA-DE-A4MC-01	TCGA-DE-A4MC-01	NA	NA	NA	69	0	913	0			913	43	<55	<45	<45	lessthan55	lessthan45			-15996	444		0	913			Minimal (T3)	Microscopic			2014-01-15	FEMALE					Thyroid Papillary Carcinoma	Classical/usual		No	150 mCi		150 mCi	Thyroxine withdrawal	C73	8260/3	C73.9	YES	260
TCGA-DE-A4MD-01	TCGA-DE-A4MD-01	NA	NA	NA	70	0	764	0	267	1	764	71	>=55	>=55	>=45	over55	over45			-26179	386		0	764	271	267	None	None			2013-10-29	MALE			NO		Thyroid Papillary Carcinoma	Classical/usual		No	171 mCi	none	171 mCi	Patient did not receive I-131 treatment	C73	8260/3	C73.9	YES	290
TCGA-DE-A69J-01	TCGA-DE-A69J-01	NA	NA	NA	71	0	447	0	447	0	447	34	<55	<45	<45	lessthan55	lessthan45			-12493	126		0	447			None	None			2014-05-12	FEMALE	NO				Thyroid Papillary Carcinoma	Classical/usual		No	50 mCi		50 mCi	Thyroxine withdrawal	C73	8260/3	C73.9	YES	130
TCGA-DE-A69K-01	TCGA-DE-A69K-01	NA	NA	NA	72	0	434	0	434	1	434	58	>=55	>=55	>=45	over55	over45			-21403	72		0	434		434	Minimal (T3)	Microscopic			2014-05-12	FEMALE	NO				Thyroid Papillary Carcinoma	Classical/usual		No	125 mCi		125 mCi	Thyroxine withdrawal	C73	8260/3	C73.9	YES	330
TCGA-DE-A7U5-01	TCGA-DE-A7U5-01	NA	NA	NA	73	0	84	0	84	0	84	36	<55	<45	<45	lessthan55	lessthan45	positive		-13411			0	84							2014-07-07	FEMALE	YES				Thyroid Papillary Carcinoma	Classical/usual		No				Patient did not receive I-131 treatment	C73	8260/3	C73.9	YES
TCGA-DJ-A13L-01	TCGA-DJ-A13L-01	V600E	NA	NA	74	0	303	0	303	0	303	85	>=55	>=55	>=45	over55	over45			-31388	149		0	303			None	None			2014-08-20	MALE	NO				Thyroid Papillary Carcinoma	Tall Cell (>= 50% tall cell features)		No				Patient did not receive I-131 treatment	C73	8344/3	C73.9	YES	40
TCGA-DJ-A13M-01	TCGA-DJ-A13M-01	NA	Q61R	NA	75	0	525	0	525	0	525	28	<55	<45	<45	lessthan55	lessthan45			-10530	126		0	525			None	None		Scheduled Follow-up Submission	2012-02-28	FEMALE	NO				Thyroid Papillary Carcinoma	Follicular (>= 99% follicular patterned)		No				Patient did not receive I-131 treatment	C73	8340/3	C73.9	YES	510
TCGA-DJ-A13O-01	TCGA-DJ-A13O-01	V600E	NA	NA	76	0	428	0	428	0	428	56	>=55	>=55	>=45	over55	over45			-20779	135		0	428			None	None		Scheduled Follow-up Submission	2012-02-28	MALE	NO				Thyroid Papillary Carcinoma	Classical/usual		No				Patient did not receive I-131 treatment	C73	8260/3	C73.9	YES	170
TCGA-DJ-A13P-01	TCGA-DJ-A13P-01	V600E	NA	NA	77	0	5150	0	5150	0	5150	52	<55	45~54	>=45	lessthan55	over45			-19297	4082		0	5150			Minimal (T3)	Microscopic		Scheduled Follow-up Submission	2014-08-20	FEMALE	NO				Thyroid Papillary Carcinoma	Classical/usual		No				Patient did not receive I-131 treatment	C73	8260/3	C73.9	YES	70
TCGA-DJ-A13R-01	TCGA-DJ-A13R-01	NA	NA	NA	78	0	103	0	103	0	103	50	<55	45~54	>=45	lessthan55	over45			-18354	95		0	103			None	None		Scheduled Follow-up Submission	2012-02-28	MALE	NO				Thyroid Papillary Carcinoma	Follicular (>= 99% follicular patterned)		No				Patient did not receive I-131 treatment	C73	8340/3	C73.9	YES	430
TCGA-DJ-A13S-01	TCGA-DJ-A13S-01	NA	NA	Q61R	79	0	265	0	265	0	265	19	<55	<45	<45	lessthan55	lessthan45			-7099	161		0	265			None	None		Scheduled Follow-up Submission	2012-02-28	FEMALE	NO				Thyroid Papillary Carcinoma	Follicular (>= 99% follicular patterned)		No				Patient did not receive I-131 treatment	C73	8340/3	C73.9	YES	320
TCGA-DJ-A13T-01	TCGA-DJ-A13T-01	V600E	NA	NA	80	0	1709	0	1709	0	1709	37	<55	<45	<45	lessthan55	lessthan45			-13668	641		0	1709			None	None		Scheduled Follow-up Submission	2014-09-22	FEMALE	NO				Thyroid Papillary Carcinoma	Classical/usual		No				Patient did not receive I-131 treatment	C73	8260/3	C73.9	YES	170
TCGA-DJ-A13U-01	TCGA-DJ-A13U-01	V600E	NA	NA	81	0	711	0	711	0	711	60	>=55	>=55	>=45	over55	over45			-22130	276		0	711			Minimal (T3)	Microscopic		Scheduled Follow-up Submission	2012-02-28	MALE	NO				Thyroid Papillary Carcinoma	Classical/usual		No	77.7 mC			rhTSH	C73	8260/3	C73.9	YES	50
TCGA-DJ-A13V-01	TCGA-DJ-A13V-01	V600E	NA	NA	82	0	558	0	558	0	558	21	<55	<45	<45	lessthan55	lessthan45			-7915	154		0	558			Minimal (T3)	Microscopic	Parent	Scheduled Follow-up Submission	2012-02-28	FEMALE	NO				Thyroid Papillary Carcinoma	Classical/usual		No	126.23 mC		126.23 mC	rhTSH	C73	8260/3	C73.9	YES	610
TCGA-DJ-A13W-01	TCGA-DJ-A13W-01	NA	NA	NA	83	0	444	0	444	0	444	45	<55	45~54	>=45	lessthan55	over45			-16558	307		0	444			None	None		Scheduled Follow-up Submission	2012-02-28	FEMALE	NO				Thyroid Papillary Carcinoma	Follicular (>= 99% follicular patterned)		No				Patient did not receive I-131 treatment	C73	8340/3	C73.9	YES	440
TCGA-DJ-A13X-01	TCGA-DJ-A13X-01	V600E	NA	NA	84	0	253	0	253	0	253	51	<55	45~54	>=45	lessthan55	over45			-18689	126		0	253			None	None		Scheduled Follow-up Submission	2012-02-28	FEMALE	NO				Thyroid Papillary Carcinoma	Follicular (>= 99% follicular patterned)		No				Patient did not receive I-131 treatment	C73	8340/3	C73.9	YES	890
TCGA-DJ-A1QD-01	TCGA-DJ-A1QD-01	V600E	NA	NA	85	0	335	0	335	0	335	20	<55	<45	<45	lessthan55	lessthan45			-7460	205		0	335			None	None		Scheduled Follow-up Submission	2012-03-14	FEMALE	NO				Thyroid Papillary Carcinoma	Classical/usual		No				Patient did not receive I-131 treatment	C73	8260/3	C73.9	YES	240
TCGA-DJ-A1QE-01	TCGA-DJ-A1QE-01	V600E	NA	NA	86	0	3042	0			3042	62	>=55	>=55	>=45	over55	over45			-22645	2945		0	3042			Minimal (T3)	Microscopic			2011-07-25	FEMALE	NO				Thyroid Papillary Carcinoma	Classical/usual		No					C73	8260/3	C73.9	YES	150
TCGA-DJ-A1QF-01	TCGA-DJ-A1QF-01	V600E	NA	NA	87	0	931	0	931	0	931	61	>=55	>=55	>=45	over55	over45			-22310	664		0	931			None	None		Scheduled Follow-up Submission	2012-03-14	FEMALE	NO				Thyroid Papillary Carcinoma	Classical/usual		No				Patient did not receive I-131 treatment	C73	8260/3	C73.9	YES	630
TCGA-DJ-A1QG-01	TCGA-DJ-A1QG-01	NA	NA	Q61R	88	0	399	0	399	0	399	62	>=55	>=55	>=45	over55	over45			-22859	115		0	399			None	None		Scheduled Follow-up Submission	2012-03-19	MALE	NO				Thyroid Papillary Carcinoma	Follicular (>= 99% follicular patterned)		No				Patient did not receive I-131 treatment	C73	8340/3	C73.9	YES	120
TCGA-DJ-A1QH-01	TCGA-DJ-A1QH-01	V600E	NA	NA	89	0	243	0			243	58	>=55	>=55	>=45	over55	over45			-21184	146		0	243			Minimal (T3)	Microscopic			2011-07-25	FEMALE	NO				Thyroid Papillary Carcinoma	Tall Cell (>= 50% tall cell features)		Yes					C73	8344/3	C73.9	YES	510
TCGA-DJ-A1QI-01	TCGA-DJ-A1QI-01	V600E	NA	NA	90	0	455	0	455	0	455	63	>=55	>=55	>=45	over55	over45			-23072	115		0	455			None	None		Scheduled Follow-up Submission	2012-03-14	FEMALE	NO				Thyroid Papillary Carcinoma	Classical/usual		No				Patient did not receive I-131 treatment	C73	8260/3	C73.9	YES	160
TCGA-DJ-A1QL-01	TCGA-DJ-A1QL-01	NA	NA	NA	91	0	207	0	207	0	207	70	>=55	>=55	>=45	over55	over45			-25713	153		0	207			None	None		Scheduled Follow-up Submission	2012-03-14	MALE	NO				Thyroid Papillary Carcinoma	Follicular (>= 99% follicular patterned)		No				Patient did not receive I-131 treatment	C73	8340/3	C73.9	YES	370
TCGA-DJ-A1QM-01	TCGA-DJ-A1QM-01	V600E	NA	NA	92	0	44	0			44	42	<55	<45	<45	lessthan55	lessthan45			-15418	129		0	44			None	None			2011-07-25	MALE	NO				Thyroid Papillary Carcinoma	Follicular (>= 99% follicular patterned)		No					C73	8340/3	C73.9	YES	150
TCGA-DJ-A1QN-01	TCGA-DJ-A1QN-01	V600E	NA	NA	93	0	1295	0	1295	0	1295	42	<55	<45	<45	lessthan55	lessthan45			-15343	204		0	1295			None	None		Scheduled Follow-up Submission	2014-08-27	FEMALE	NO				Thyroid Papillary Carcinoma	Classical/usual		No				Patient did not receive I-131 treatment	C73	8260/3	C73.9	YES	310
TCGA-DJ-A1QO-01	TCGA-DJ-A1QO-01	V600E	NA	NA	94	0	1442	0	1062	1	1442	69	>=55	>=55	>=45	over55	over45			-25232	146		0	1442	1099	1062	Minimal (T3)	Microscopic		Scheduled Follow-up Submission	2014-09-30	MALE	NO		NO		Thyroid Papillary Carcinoma	Tall Cell (>= 50% tall cell features)		No	75.8 mCi		75.8 mCi	Patient did not receive I-131 treatment	C73	8344/3	C73.9	YES	240
TCGA-DJ-A1QQ-01	TCGA-DJ-A1QQ-01	V600E	NA	NA	95	0	534	0	534	0	534	43	<55	<45	<45	lessthan55	lessthan45			-15949	176		0	534			Minimal (T3)	Microscopic		Scheduled Follow-up Submission	2012-03-14	MALE	NO				Thyroid Papillary Carcinoma	Classical/usual		No				Patient did not receive I-131 treatment	C73	8260/3	C73.9	YES	70
TCGA-DJ-A2PN-01	TCGA-DJ-A2PN-01	V600E	NA	NA	96	0	307	0	307	0	307	70	>=55	>=55	>=45	over55	over45			-25690	237		0	307			None	None		Scheduled Follow-up Submission	2012-04-03	FEMALE	NO				Thyroid Papillary Carcinoma	Classical/usual		No				Patient did not receive I-131 treatment	C73	8260/3	C73.9	YES	380
TCGA-DJ-A2PO-01	TCGA-DJ-A2PO-01	V600E	NA	NA	97	0	238	0	238	0	238	54	<55	45~54	>=45	lessthan55	over45			-20058	238		0	238			None	None		Scheduled Follow-up Submission	2012-04-03	MALE	NO				Thyroid Papillary Carcinoma	Classical/usual		No				Patient did not receive I-131 treatment	C73	8260/3	C73.9	YES	150
TCGA-DJ-A2PP-01	TCGA-DJ-A2PP-01	NA	NA	Q61R	98	0	162	0			162	47	<55	45~54	>=45	lessthan55	over45			-17410	148		0	162			None	None			2012-01-23	MALE	NO				Thyroid Papillary Carcinoma	Follicular (>= 99% follicular patterned)		No					C73	8340/3	C73.9	YES	460
TCGA-DJ-A2PQ-01	TCGA-DJ-A2PQ-01	V600E	NA	NA	99	0	1077	0	1077	0	1077	26	<55	<45	<45	lessthan55	lessthan45			-9664	223		0	1077			None	None		Scheduled Follow-up Submission	2014-09-22	MALE	NO				Thyroid Papillary Carcinoma	Classical/usual		No	150 mCi		150 mCi	rhTSH	C73	8260/3	C73.9	YES	680
TCGA-DJ-A2PR-01	TCGA-DJ-A2PR-01	V600E	NA	NA	100	0	835	0	835	0	835	27	<55	<45	<45	lessthan55	lessthan45			-9914	155		0	835			Minimal (T3)	Microscopic		Scheduled Follow-up Submission	2014-09-22	MALE	NO				Thyroid Papillary Carcinoma	Classical/usual		No				Patient did not receive I-131 treatment	C73	8260/3	C73.9	YES	450
TCGA-DJ-A2PS-01	TCGA-DJ-A2PS-01	V600E	NA	NA	101	0	797	0	797	0	797	40	<55	<45	<45	lessthan55	lessthan45			-14916	207		0	797			Minimal (T3)	Microscopic		Scheduled Follow-up Submission	2014-09-03	FEMALE	NO				Thyroid Papillary Carcinoma	Classical/usual		No	179.7 mCi		179.7 mCi	rhTSH	C73	8260/3	C73.9	YES	140
TCGA-DJ-A2PT-01	TCGA-DJ-A2PT-01	V600E	NA	NA	102	0	1181	0	1181	0	1181	70	>=55	>=55	>=45	over55	over45			-25837	182		0	1181			Minimal (T3)	Microscopic	Sibling	Scheduled Follow-up Submission	2014-09-03	FEMALE	NO				Thyroid Papillary Carcinoma	Tall Cell (>= 50% tall cell features)		No	94.6 mCi		94.6 mCi	rhTSH	C73	8260/3	C73.9	YES	410
TCGA-DJ-A2PU-01	TCGA-DJ-A2PU-01	V600E	NA	NA	103	0	382	0	382	0	382	52	<55	45~54	>=45	lessthan55	over45			-18998	202		0	382			None	None		Scheduled Follow-up Submission	2012-04-03	FEMALE	NO				Thyroid Papillary Carcinoma	Classical/usual		No				Patient did not receive I-131 treatment	C73	8260/3	C73.9	YES	380
TCGA-DJ-A2PV-01	TCGA-DJ-A2PV-01	V600E	NA	NA	104	0	252	0	252	0	252	53	<55	45~54	>=45	lessthan55	over45			-19547	202		0	252			None	None	Parent	Scheduled Follow-up Submission	2012-04-03	FEMALE	NO				Thyroid Papillary Carcinoma	Classical/usual		No				Patient did not receive I-131 treatment	C73	8260/3	C73.9	YES	150
TCGA-DJ-A2PW-01	TCGA-DJ-A2PW-01	V600E	NA	NA	105	0	1060	0	1060	0	1060	65	>=55	>=55	>=45	over55	over45			-23987	145		0	1060			None	None		Scheduled Follow-up Submission	2014-09-03	MALE	NO				Thyroid Papillary Carcinoma	Classical/usual		No	97.3 mCi		97.3 mCi	rhTSH	C73	8260/3	C73.9	YES	370
TCGA-DJ-A2PX-01	TCGA-DJ-A2PX-01	Fusion	NA	NA	106	0	168	0	168	0	168	55	>=55	>=55	>=45	over55	over45			-20088	117		0	168			None	None		Scheduled Follow-up Submission	2012-04-17	FEMALE	NO				Thyroid Papillary Carcinoma	Follicular (>= 99% follicular patterned)		No				Patient did not receive I-131 treatment	C73	8340/3	C73.9	YES	60
TCGA-DJ-A2PY-01	TCGA-DJ-A2PY-01	V600E	NA	NA	107	0	267	0	267	0	267	46	<55	45~54	>=45	lessthan55	over45			-17056	105		0	267			Minimal (T3)	Microscopic		Scheduled Follow-up Submission	2012-04-17	FEMALE	NO				Thyroid Papillary Carcinoma	Tall Cell (>= 50% tall cell features)		No				Patient did not receive I-131 treatment	C73	8344/3	C73.9	YES	220
TCGA-DJ-A2PZ-01	TCGA-DJ-A2PZ-01	V600E	NA	NA	108	0	256	0	256	0	256	63	>=55	>=55	>=45	over55	over45			-23332	131		0	256			Minimal (T3)	Microscopic		Scheduled Follow-up Submission	2012-04-17	MALE	NO				Thyroid Papillary Carcinoma	Classical/usual		No				Patient did not receive I-131 treatment	C73	8260/3	C73.9	YES	310
TCGA-DJ-A2Q0-01	TCGA-DJ-A2Q0-01	NA	NA	NA	109	0	1045	0	1045	0	1045	57	>=55	>=55	>=45	over55	over45			-20973	114		0	1045			None	None		Scheduled Follow-up Submission	2014-09-03	FEMALE	NO				Thyroid Papillary Carcinoma	Classical/usual		No				Patient did not receive I-131 treatment	C73	8260/3	C73.9	YES	240
TCGA-DJ-A2Q1-01	TCGA-DJ-A2Q1-01	NA	NA	NA	110	0	1148	0	1148	0	1148	44	<55	<45	<45	lessthan55	lessthan45			-16371	121		0	1148			None	None			2014-09-03	FEMALE	NO				Thyroid Papillary Carcinoma	Classical/usual		No	148.9 mCi		148.9 mCi	rhTSH	C73	8260/3	C73.9	YES	170
TCGA-DJ-A2Q2-01	TCGA-DJ-A2Q2-01	NA	NA	NA	111	0	206	0	206	0	206	57	>=55	>=55	>=45	over55	over45			-20951	106		0	206			None	None		Scheduled Follow-up Submission	2012-04-17	FEMALE	NO				Thyroid Papillary Carcinoma	Follicular (>= 99% follicular patterned)		No	73.24 mCi		73.24 mCi	rhTSH	C73	8340/3	C73.9	YES	340
TCGA-DJ-A2Q3-01	TCGA-DJ-A2Q3-01	V600E	NA	NA	112	0	1224	0	385	1	1224	61	>=55	>=55	>=45	over55	over45			-22637	125		0	1224	404	385	Minimal (T3)	Microscopic		Scheduled Follow-up Submission	2014-09-22	FEMALE	NO		YES	Poorly differentiated	Thyroid Papillary Carcinoma	Tall Cell (>= 50% tall cell features)		No	99.3 mCi		99.3 mCi	Patient did not receive I-131 treatment	C73	8344/3	C73.9	YES	80
TCGA-DJ-A2Q4-01	TCGA-DJ-A2Q4-01	V600E	NA	NA	113	0	287	0	287	0	287	53	<55	45~54	>=45	lessthan55	over45			-19689	121		0	287			None	None		Scheduled Follow-up Submission	2012-04-12	MALE	NO				Thyroid Papillary Carcinoma	Classical/usual		No				Patient did not receive I-131 treatment	C73	8260/3	C73.9	YES	210
TCGA-DJ-A2Q5-01	TCGA-DJ-A2Q5-01	V600E	NA	NA	114	0	1140	0	1140	0	1140	51	<55	45~54	>=45	lessthan55	over45			-18727	139		0	1140			None	None		Scheduled Follow-up Submission	2014-09-08	MALE	NO				Thyroid Papillary Carcinoma	Classical/usual		No	152.92 mCi		152.92 mCi	rhTSH	C73	8260/3	C73.9	YES	420
TCGA-DJ-A2Q6-01	TCGA-DJ-A2Q6-01	V600E	NA	NA	115	0	1109	0	1109	0	1109	38	<55	<45	<45	lessthan55	lessthan45			-14193	138		0	1109			Minimal (T3)	Microscopic		Scheduled Follow-up Submission	2014-09-08	FEMALE	NO				Thyroid Papillary Carcinoma	Classical/usual		No	148.9 mCi		148.9 mCi	rhTSH	C73	8260/3	C73.9	YES	90
TCGA-DJ-A2Q7-01	TCGA-DJ-A2Q7-01	V600E	NA	NA	116	0	307	0	307	0	307	52	<55	45~54	>=45	lessthan55	over45			-19193	160		0	307			Minimal (T3)	Microscopic		Scheduled Follow-up Submission	2012-04-17	FEMALE	NO				Thyroid Papillary Carcinoma	Classical/usual		No				Patient did not receive I-131 treatment	C73	8260/3	C73.9	YES	590
TCGA-DJ-A2Q9-01	TCGA-DJ-A2Q9-01	V600E	NA	NA	117	0	1092	0	1092	0	1092	65	>=55	>=55	>=45	over55	over45			-23951	181		0	1092			None	None		Scheduled Follow-up Submission	2014-09-08	FEMALE	NO				Thyroid Papillary Carcinoma	Tall Cell (>= 50% tall cell features)		No	73.9 mCi		73.9 mCi	rhTSH	C73	8344/3	C73.9	YES	210
TCGA-DJ-A2QA-01	TCGA-DJ-A2QA-01	V600E	NA	NA	118	0	378	0			378	56	>=55	>=55	>=45	over55	over45			-20784	273		0	378			Minimal (T3)	Microscopic			2012-02-20	FEMALE	NO				Thyroid Papillary Carcinoma	Follicular (>= 99% follicular patterned)		No					C73	8340/3	C73.9	YES	140
TCGA-DJ-A2QB-01	TCGA-DJ-A2QB-01	NA	Q61R	NA	119	0	1070	0	1070	0	1070	53	<55	45~54	>=45	lessthan55	over45			-19601	148		0	1070			Minimal (T3)	Microscopic		Scheduled Follow-up Submission	2014-09-08	FEMALE	NO				Thyroid Papillary Carcinoma	Follicular (>= 99% follicular patterned)		No	147.7 mCi		147.7 mCi	rhTSH	C73	8340/3	C73.9	YES	240
TCGA-DJ-A2QC-01	TCGA-DJ-A2QC-01	V600E	NA	NA	120	0	483	0	483	0	483	70	>=55	>=55	>=45	over55	over45			-25690	237		0	483			None	None		Scheduled Follow-up Submission	2012-04-17	FEMALE	NO				Thyroid Papillary Carcinoma	Classical/usual		No				Patient did not receive I-131 treatment	C73	8260/3	C73.9	YES	230
TCGA-DJ-A3UK-01	TCGA-DJ-A3UK-01	V600E	NA	NA	121	0	459	0	459	0	459	35	<55	<45	<45	lessthan55	lessthan45			-13145	139		0	459			None	None			2013-08-23	FEMALE	NO				Thyroid Papillary Carcinoma	Classical/usual		No				Patient did not receive I-131 treatment	C73	8260/3	C73.9	YES	170
TCGA-DJ-A3UM-01	TCGA-DJ-A3UM-01	V600E	NA	NA	122	0	944	0	944	0	944	45	<55	45~54	>=45	lessthan55	over45			-16573	517		0	944			None	None			2013-08-23	FEMALE	NO				Thyroid Papillary Carcinoma	Classical/usual		No				Patient did not receive I-131 treatment	C73	8260/3	C73.9	YES	40
TCGA-DJ-A3UN-01	TCGA-DJ-A3UN-01	V600E	NA	NA	123	0	622	0	622	0	622	51	<55	45~54	>=45	lessthan55	over45			-18871	282		0	622			None	None			2013-08-23	FEMALE	NO				Thyroid Papillary Carcinoma	Classical/usual		No				Patient did not receive I-131 treatment	C73	8260/3	C73.9	YES	100
TCGA-DJ-A3UO-01	TCGA-DJ-A3UO-01	V600E	NA	NA	124	0	957	0	641	1	957	63	>=55	>=55	>=45	over55	over45			-23292	482		0	957		641	Minimal (T3)	Microscopic			2013-08-23	MALE	NO				Thyroid Papillary Carcinoma	Classical/usual		No	148.6 mCi	0	148.6 mCi	rhTSH	C73	8260/3	C73.9	YES	420
TCGA-DJ-A3UP-01	TCGA-DJ-A3UP-01	NA	NA	Q61R	125	0	499	0	499	0	499	38	<55	<45	<45	lessthan55	lessthan45			-13899	148		0	499			None	None			2013-08-23	FEMALE	NO				Thyroid Papillary Carcinoma	Follicular (>= 99% follicular patterned)		No	29.47 mCi	0	29.47 mCi	rhTSH	C73	8340/3	C73.9	YES	310
TCGA-DJ-A3UQ-01	TCGA-DJ-A3UQ-01	V600E	NA	NA	126	0	595	0	595	0	595	45	<55	45~54	>=45	lessthan55	over45			-16545			0	595			Minimal (T3)	Microscopic			2013-08-23	FEMALE	NO				Thyroid Papillary Carcinoma	Tall Cell (>= 50% tall cell features)		No	97.8 mCi	0	97.8 mCi	rhTSH	C73	8344/3	C73.9	YES
TCGA-DJ-A3UR-01	TCGA-DJ-A3UR-01	V600E	NA	NA	127	0	1105	0	1105	0	1105	51	<55	45~54	>=45	lessthan55	over45			-18808	623		0	1105			Minimal (T3)	Microscopic			2013-08-27	FEMALE	NO				Thyroid Papillary Carcinoma	Follicular (>= 99% follicular patterned)		No				Patient did not receive I-131 treatment	C73	8340/3	C73.9	YES	80
TCGA-DJ-A3US-01	TCGA-DJ-A3US-01	NA	NA	NA	128	0	998	0	998	0	998	37	<55	<45	<45	lessthan55	lessthan45			-13634	524		0	998			None	None			2013-08-27	FEMALE	NO				Thyroid Papillary Carcinoma	Classical/usual		No				Patient did not receive I-131 treatment	C73	8260/3	C73.9	YES	240
TCGA-DJ-A3UT-01	TCGA-DJ-A3UT-01	NA	NA	Q61R	129	0	737	0	737	0	737	43	<55	<45	<45	lessthan55	lessthan45			-15767	464		0	737			None	None			2013-08-27	FEMALE					Thyroid Papillary Carcinoma	Follicular (>= 99% follicular patterned)		No				Patient did not receive I-131 treatment	C73	8340/3	C73.9	YES	70
TCGA-DJ-A3UU-01	TCGA-DJ-A3UU-01	V600E	NA	NA	130	0	538	0	538	0	538	49	<55	45~54	>=45	lessthan55	over45			-17919	520		0	538			Minimal (T3)	Microscopic			2012-08-13	FEMALE					Thyroid Papillary Carcinoma	Classical/usual		No	163mCi	143.4 mCi	306.4 mCi	rhTSH	C73	8260/3	C73.9	YES	200
TCGA-DJ-A3UV-01	TCGA-DJ-A3UV-01	NA	NA	NA	131	0	724	0	724	0	724	18	<55	<45	<45	lessthan55	lessthan45			-6850	475		0	724			None	None			2013-08-27	FEMALE					Thyroid Papillary Carcinoma	Classical/usual		No				Patient did not receive I-131 treatment	C73	8260/3	C73.9	YES	120
TCGA-DJ-A3UW-01	TCGA-DJ-A3UW-01	V600E	NA	NA	132	0	1812	0	1812	0	1812	50	<55	45~54	>=45	lessthan55	over45			-18487	1665		0	1812			None	None			2013-08-27	FEMALE					Thyroid Papillary Carcinoma	Classical/usual		No				Patient did not receive I-131 treatment	C73	8260/3	C73.9	YES	40
TCGA-DJ-A3UX-01	TCGA-DJ-A3UX-01	V600E	NA	NA	133	0	345	0	345	0	345	46	<55	45~54	>=45	lessthan55	over45	V600E mutation detected		-17124	568		0	345			None	None			2012-08-13	FEMALE	YES				Thyroid Papillary Carcinoma	Classical/usual		No				Patient did not receive I-131 treatment	C73	8260/3	C73.9	YES	20
TCGA-DJ-A3UY-01	TCGA-DJ-A3UY-01	V600E	NA	NA	134	0	650	0	650	0	650	32	<55	<45	<45	lessthan55	lessthan45			-12004	295		0	650			None	None			2013-08-27	FEMALE	NO				Thyroid Papillary Carcinoma	Classical/usual		No				Patient did not receive I-131 treatment	C73	8260/3	C73.9	YES	400
TCGA-DJ-A3UZ-01	TCGA-DJ-A3UZ-01	NA	NA	NA	135	0	563	0	563	0	563	70	>=55	>=55	>=45	over55	over45			-25846	289		0	563			Minimal (T3)	Microscopic	Parent		2013-08-27	FEMALE	NO				Thyroid Papillary Carcinoma	Classical/usual		No				Patient did not receive I-131 treatment	C73	8260/3	C73.9	YES	190
TCGA-DJ-A3V0-01	TCGA-DJ-A3V0-01	NA	NA	NA	136	0	1125	0	1125	0	1125	56	>=55	>=55	>=45	over55	over45			-20496	664		0	1125			Moderate/Advanced (T4a)	Gross	Sibling		2013-08-27	MALE	NO				Thyroid Papillary Carcinoma	Tall Cell (>= 50% tall cell features)		No	150 mCi	0	150 mCi	rhTSH	C73	8344/3	C73.9	YES	510
TCGA-DJ-A3V2-01	TCGA-DJ-A3V2-01	NA	NA	NA	137	0	615	0	615	0	615	44	<55	<45	<45	lessthan55	lessthan45			-16382	295		0	615			None	None			2013-08-27	FEMALE	NO				Thyroid Papillary Carcinoma	Classical/usual		No				Patient did not receive I-131 treatment	C73	8260/3	C73.9	YES	210
TCGA-DJ-A3V3-01	TCGA-DJ-A3V3-01	NA	NA	NA	138	0	931	0	931	0	931	57	>=55	>=55	>=45	over55	over45			-20997	464		0	931			None	None			2013-08-27	FEMALE	NO				Thyroid Papillary Carcinoma	Classical/usual		No				Patient did not receive I-131 treatment	C73	8260/3	C73.9	YES	140
TCGA-DJ-A3V4-01	TCGA-DJ-A3V4-01	NA	NA	NA	139	0	653	0	653	0	653	60	>=55	>=55	>=45	over55	over45			-22218	345		0	653			Minimal (T3)	Microscopic			2013-08-27	FEMALE	NO				Thyroid Papillary Carcinoma	Tall Cell (>= 50% tall cell features)		No	95.4 mCi	0	95.4 mCi	rhTSH	C73	8344/3	C73.9	YES	60
TCGA-DJ-A3V5-01	TCGA-DJ-A3V5-01	NA	NA	NA	140	0	584	0	584	0	584	76	>=55	>=55	>=45	over55	over45			-27918	240		0	584			Minimal (T3)	Microscopic			2013-08-27	FEMALE	NO				Thyroid Papillary Carcinoma	Tall Cell (>= 50% tall cell features)		No				rhTSH	C73	8344/3	C73.9	YES	40
TCGA-DJ-A3V6-01	TCGA-DJ-A3V6-01	NA	NA	NA	141	0	818	0	818	0	818	54	<55	45~54	>=45	lessthan55	over45			-19870	378		0	818			Minimal (T3)	Microscopic			2013-08-27	MALE	NO				Thyroid Papillary Carcinoma	Tall Cell (>= 50% tall cell features)		Yes	119.8 mCi	0	119.8 mCi	rhTSH	C73	8344/3	C73.9	YES	190
TCGA-DJ-A3V7-01	TCGA-DJ-A3V7-01	V600E	NA	NA	142	0	706	0	706	0	706	44	<55	<45	<45	lessthan55	lessthan45			-16257	321		0	706			Minimal (T3)	Microscopic			2013-08-27	FEMALE	NO				Thyroid Papillary Carcinoma	Tall Cell (>= 50% tall cell features)		No	99.8 mCi	0	99.8 mCi	rhTSH	C73	8344/3	C73.9	YES	170
TCGA-DJ-A3V8-01	TCGA-DJ-A3V8-01	NA	NA	NA	143	0	647	0	647	0	647	28	<55	<45	<45	lessthan55	lessthan45			-10398	248		0	647			Minimal (T3)	Microscopic			2013-08-27	FEMALE	NO				Thyroid Papillary Carcinoma	Tall Cell (>= 50% tall cell features)		No	102.8 mCi	0	102.8 mCi	rhTSH	C73	8344/3	C73.9	YES	80
TCGA-DJ-A3V9-01	TCGA-DJ-A3V9-01	NA	NA	NA	144	0	623	0	623	0	623	50	<55	45~54	>=45	lessthan55	over45			-18399	171		0	623			None	None			2013-08-27	FEMALE	NO				Thyroid Papillary Carcinoma	Classical/usual		No	153.2 mCi	0	153.2 mCi	rhTSH	C73	8260/3	C73.9	YES	170
TCGA-DJ-A3VA-01	TCGA-DJ-A3VA-01	V600E	NA	NA	145	0	755	0	755	0	755	39	<55	<45	<45	lessthan55	lessthan45			-14495	295		0	755			None	None			2013-08-27	FEMALE	NO				Thyroid Papillary Carcinoma	Classical/usual		No				Patient did not receive I-131 treatment	C73	8260/3	C73.9	YES	130
TCGA-DJ-A3VB-01	TCGA-DJ-A3VB-01	V600E	NA	NA	146	0	697	0	697	0	697	52	<55	45~54	>=45	lessthan55	over45			-19248	273		0	697			Minimal (T3)	Microscopic			2013-08-27	MALE	NO				Thyroid Papillary Carcinoma	Tall Cell (>= 50% tall cell features)		No	149.7 mCi	0	149.7 mCi	rhTSH	C73	8344/3	C73.9	YES	670
TCGA-DJ-A3VD-01	TCGA-DJ-A3VD-01	NA	NA	NA	147	0	639	0	639	0	639	32	<55	<45	<45	lessthan55	lessthan45			-12019	275		0	639			None	None			2013-08-27	FEMALE	NO				Thyroid Papillary Carcinoma	Classical/usual		No	124.1 mCi	0	124.1 mCi	rhTSH	C73	8260/3	C73.9	YES	50
TCGA-DJ-A3VE-01	TCGA-DJ-A3VE-01	V600E	NA	NA	148	0	577	0	577	0	577	50	<55	45~54	>=45	lessthan55	over45			-18417	100		0	577			None	None			2013-08-27	MALE	NO				Thyroid Papillary Carcinoma	Classical/usual		No				Patient did not receive I-131 treatment	C73	8260/3	C73.9	YES	250
TCGA-DJ-A3VF-01	TCGA-DJ-A3VF-01	V600E	NA	NA	149	0	236	0	236	0	236	60	>=55	>=55	>=45	over55	over45			-22234			0	236			Minimal (T3)	Microscopic			2012-08-21	FEMALE	NO				Thyroid Papillary Carcinoma	Tall Cell (>= 50% tall cell features)		No	122.1 mCi		122.1 mCi	rhTSH	C73	8344/3	C73.9	YES
TCGA-DJ-A3VG-01	TCGA-DJ-A3VG-01	NA	NA	NA	150	0	253	0	253	0	253	40	<55	<45	<45	lessthan55	lessthan45			-14970	591		0	253			None	None			2012-08-21	MALE	NO				Thyroid Papillary Carcinoma	Follicular (>= 99% follicular patterned)		No				Patient did not receive I-131 treatment	C73	8340/3	C73.9	YES	60
TCGA-DJ-A3VI-01	TCGA-DJ-A3VI-01	NA	NA	NA	151																342																												140
TCGA-DJ-A3VJ-01	TCGA-DJ-A3VJ-01	V600E	NA	NA	152	0	736	0	736	0	736	22	<55	<45	<45	lessthan55	lessthan45			-8341	541		0	736			Minimal (T3)	Microscopic			2013-08-27	MALE	NO				Other specify		Papillary carcinoma, diffuse sclerosing variant	No	157 mCi	0	157 mCi	rhTSH	C73	8350/3	C73.9	YES	200
TCGA-DJ-A3VK-01	TCGA-DJ-A3VK-01	K591_A598dup	NA	NA	153																374																												120
TCGA-DJ-A3VL-01	TCGA-DJ-A3VL-01	P490_Q494del	NA	NA	154	0	524	0			524	38	<55	<45	<45	lessthan55	lessthan45			-14219	401		0	524			None	None			2013-03-27	MALE	NO				Thyroid Papillary Carcinoma	Follicular (>= 99% follicular patterned)		No				Patient did not receive I-131 treatment	C73	8340/3	C73.9	YES	40
TCGA-DJ-A3VM-01	TCGA-DJ-A3VM-01	NA	NA	NA	155	0	840	0	840	0	840	68	>=55	>=55	>=45	over55	over45			-24896	379		0	840			None	None	Sibling		2013-08-27	FEMALE	NO				Thyroid Papillary Carcinoma	Follicular (>= 99% follicular patterned)		No	104.8 mCi	0	104.8 mCi	rhTSH	C73	8340/3	C73.9	YES	310
TCGA-DJ-A4UL-01	TCGA-DJ-A4UL-01	V600E	NA	NA	156	0	554	0	554	0	554	68	>=55	>=55	>=45	over55	over45			-24939	244		0	554			None	None			2014-01-03	FEMALE	NO				Thyroid Papillary Carcinoma	Classical/usual		No				Patient did not receive I-131 treatment	C73	8260/3	C73.9	YES	340
TCGA-DJ-A4UP-01	TCGA-DJ-A4UP-01	NA	NA	NA	157	0	649	0	649	0	649	15	<55	<45	<45	lessthan55	lessthan45			-5655	231		0	649			None	None			2014-01-03	FEMALE	NO				Thyroid Papillary Carcinoma	Classical/usual		No	105.6 mCi	0	105.6 mCi	rhTSH	C73	8260/3	C73.9	YES	270
TCGA-DJ-A4UQ-01	TCGA-DJ-A4UQ-01	NA	NA	NA	158	0	580	0	580	0	580	60	>=55	>=55	>=45	over55	over45			-22097	257		0	580			Minimal (T3)	Microscopic			2014-02-06	MALE	NO				Other specify		Papillary carcinoma, diffuse sclerosing variant	No	148.8 mCi	0	148.8 mCi	rhTSH	C73	8350/3	C73.9	YES	60
TCGA-DJ-A4UR-01	TCGA-DJ-A4UR-01	NA	NA	NA	159	0	469	0	113	1	469	36	<55	<45	<45	lessthan55	lessthan45			-13463	216		0	469		113	Minimal (T3)	Microscopic			2014-02-06	FEMALE	NO		NO		Thyroid Papillary Carcinoma	Follicular (>= 99% follicular patterned)		No	154.0 mCi	0	154.0 mCi	rhTSH	C73	8340/3	C73.9	YES	150
TCGA-DJ-A4UT-01	TCGA-DJ-A4UT-01	NA	NA	NA	160	0	430	0	430	0	430	32	<55	<45	<45	lessthan55	lessthan45			-11813	222		0	430			None	None			2014-01-03	FEMALE	NO				Thyroid Papillary Carcinoma	Classical/usual		No				Patient did not receive I-131 treatment	C73	8260/3	C73.9	YES	70
TCGA-DJ-A4UW-01	TCGA-DJ-A4UW-01	V600E	NA	NA	161	0	447	0	447	0	447	34	<55	<45	<45	lessthan55	lessthan45			-12563	232		0	447			None	None			2014-01-03	FEMALE	NO				Thyroid Papillary Carcinoma	Tall Cell (>= 50% tall cell features)		No	144.1 mCi	0	144.1 mCi	rhTSH	C73	8344/3	C73.9	YES	70
TCGA-DJ-A4V0-01	TCGA-DJ-A4V0-01	NA	NA	NA	162	0	542	0	542	0	542	36	<55	<45	<45	lessthan55	lessthan45			-13168	236		0	542			None	None			2014-01-03	FEMALE	NO	No RET/PTC Rearrangement Detected			Thyroid Papillary Carcinoma	Classical/usual		No				Patient did not receive I-131 treatment	C73	8260/3	C73.9	YES	300
TCGA-DJ-A4V2-01	TCGA-DJ-A4V2-01	V600E	NA	NA	163	0	95	0	95	0	95	38	<55	<45	<45	lessthan55	lessthan45			-14126	283		0	95			None	None	Sibling		2013-03-12	FEMALE	NO				Thyroid Papillary Carcinoma	Classical/usual		No				Patient did not receive I-131 treatment	C73	8260/3	C73.9	YES	230
TCGA-DJ-A4V4-01	TCGA-DJ-A4V4-01	V600E	NA	NA	164	0	481	0	481	0	481	48	<55	45~54	>=45	lessthan55	over45			-17878			0	481			None	None			2014-01-03	FEMALE	NO				Thyroid Papillary Carcinoma	Tall Cell (>= 50% tall cell features)		No				Patient did not receive I-131 treatment	C73	8344/3	C73.9	YES
TCGA-DJ-A4V5-01	TCGA-DJ-A4V5-01	NA	NA	NA	165	0	740	0	740	0	740	55	>=55	>=55	>=45	over55	over45			-20108	357		0	740			Minimal (T3)	Microscopic			2014-01-03	MALE	NO				Thyroid Papillary Carcinoma	Classical/usual		No	148.3 mCi	0	148.3 mCi	rhTSH	C73	8260/3	C73.9	YES	780
TCGA-DO-A1JZ-01	TCGA-DO-A1JZ-01	NA	NA	NA	166	0	1670	0	1670	0	1670	23	<55	<45	<45	lessthan55	lessthan45			-8551	1386		0	1670			None	None		Scheduled Follow-up Submission	2012-02-13	FEMALE	NO				Thyroid Papillary Carcinoma	Follicular (>= 99% follicular patterned)		No	98.3 mCi		98.3 mCi	Thyroxine withdrawal	C73	8340/3	C73.9	YES	90
TCGA-DO-A1K0-01	TCGA-DO-A1K0-01	V600E	NA	NA	167	0	655	0	577	1	655	30	<55	<45	<45	lessthan55	lessthan45		577	-11216	282		0	655		577	Minimal (T3)	Microscopic		Scheduled Follow-up Submission	2012-04-12	FEMALE	NO		NO		Thyroid Papillary Carcinoma	Classical/usual		No	153.8 mCi		153.8 mCi	Patient did not receive I-131 treatment	C73	8260/3	C73.9	YES	260
TCGA-DO-A2HM-01	TCGA-DO-A2HM-01	V600E	NA	NA	168	0	71	0			71	49	<55	45~54	>=45	lessthan55	over45			-18068	93		0	71			None	None			2012-10-02	MALE	NO				Thyroid Papillary Carcinoma	Classical/usual		No					C73	8260/3	C73.9	YES	80
TCGA-E3-A3DY-01	TCGA-E3-A3DY-01	V600E	NA	NA	169	0	945	0	945	0	945	37	<55	<45	<45	lessthan55	lessthan45			-13860	1682		0	945			None	None			2012-10-05	MALE	NO				Other specify		Papillary carcinoma: mixed papillary and follicular variant	No	150		150		C73	8340/3	C73.9	YES	220
TCGA-E3-A3DZ-01	TCGA-E3-A3DZ-01	NA	Q61K	NA	170	0	367	0	367	0	367	55	>=55	>=55	>=45	over55	over45			-20251	303		0	367			None	None			2012-10-05	FEMALE	NO				Thyroid Papillary Carcinoma	Follicular (>= 99% follicular patterned)		No	150		150	rhTSH	C73	8340/3	C73.9	YES	260
TCGA-E3-A3E0-01	TCGA-E3-A3E0-01	NA	NA	NA	171	0	2019	0	2019	0	2019	34	<55	<45	<45	lessthan55	lessthan45			-12645	1802		0	2019			None	None			2012-10-05	FEMALE	NO				Thyroid Papillary Carcinoma	Classical/usual		No				Patient did not receive I-131 treatment	C73	8260/3	C73.9	YES	160
TCGA-E3-A3E1-01	TCGA-E3-A3E1-01	V600E	NA	NA	172	0	1223	0	1223	0	1223	46	<55	45~54	>=45	lessthan55	over45			-16895	1737		0	1223			None	None			2012-10-09	FEMALE	NO				Thyroid Papillary Carcinoma	Classical/usual		No				Patient did not receive I-131 treatment	C73	8260/3	C73.9	YES	70
TCGA-E3-A3E2-01	TCGA-E3-A3E2-01	V600E	NA	NA	173	0	1922	0	1922	0	1922	34	<55	<45	<45	lessthan55	lessthan45			-12714	1704		0	1922			None	None	Sibling		2012-10-05	FEMALE	NO				Thyroid Papillary Carcinoma	Follicular (>= 99% follicular patterned)		No	150	150	300		C73	8340/3	C73.9	YES	30
TCGA-E3-A3E3-01	TCGA-E3-A3E3-01	V600E	NA	NA	174	0	922	0	922	0	922	49	<55	45~54	>=45	lessthan55	over45			-18140	643		0	922			None	None			2012-10-05	FEMALE	NO				Thyroid Papillary Carcinoma	Classical/usual		No	154.9		154.9	rhTSH	C73	8260/3	C73.9	YES	250
TCGA-E3-A3E5-01	TCGA-E3-A3E5-01	V600E	NA	NA	175	0	427	0	427	0	427	57	>=55	>=55	>=45	over55	over45			-20993	352		0	427			None	None			2012-10-05	MALE	NO				Thyroid Papillary Carcinoma	Classical/usual		No	175		175	rhTSH	C73	8260/3	C73.9	YES	220
TCGA-E8-A242-01	TCGA-E8-A242-01	V600E	NA	NA	176	0	35	0			35	56	>=55	>=55	>=45	over55	over45			-20472	69		0	35			Minimal (T3)	Microscopic			2011-03-30	FEMALE					Thyroid Papillary Carcinoma	Classical/usual		No					C73	8260/3	C73.9	YES	270
TCGA-E8-A2EA-01	TCGA-E8-A2EA-01	V600E	NA	NA	177	0	678	0	678	0	678	52	<55	45~54	>=45	lessthan55	over45			-19159	65		0	678			None	None			2013-03-18	FEMALE					Thyroid Papillary Carcinoma	Classical/usual		No					C73	8260/3	C73.9	YES	170
TCGA-E8-A2JQ-01	TCGA-E8-A2JQ-01	NA	NA	NA	178	0	356	0	356	0	356	18	<55	<45	<45	lessthan55	lessthan45			-6684	107		0	356			Minimal (T3)	Microscopic			2014-04-01	FEMALE					Thyroid Papillary Carcinoma	Classical/usual		No				Patient did not receive I-131 treatment	C73	8260/3	C73.9	YES	140
TCGA-E8-A3X7-01	TCGA-E8-A3X7-01	NA	NA	NA	179	0	596	0	596	0	596	57	>=55	>=55	>=45	over55	over45			-20983	148		0	596			Moderate/Advanced (T4a)	Gross			2013-12-10	FEMALE					Thyroid Papillary Carcinoma	Classical/usual		No				Patient did not receive I-131 treatment	C73	8260/3	C73.9	YES	200
TCGA-E8-A413-01	TCGA-E8-A413-01	V600E	NA	NA	180	0	414	0	414	0	414	38	<55	<45	<45	lessthan55	lessthan45			-13909	54		0	414			None	None			2013-07-26	FEMALE					Thyroid Papillary Carcinoma	Classical/usual		No				Patient did not receive I-131 treatment	C73	8260/3	C73.9	YES	440
TCGA-E8-A414-01	TCGA-E8-A414-01	NA	NA	NA	181	0	434	0	434	0	434	45	<55	45~54	>=45	lessthan55	over45			-16754	72		0	434			None	None			2013-07-23	FEMALE					Thyroid Papillary Carcinoma	Classical/usual		No				Patient did not receive I-131 treatment	C73	8260/3	C73.9	YES	520
TCGA-E8-A415-01	TCGA-E8-A415-01	V600E	NA	NA	182	0	420	0	420	0	420	39	<55	<45	<45	lessthan55	lessthan45			-14288	58		0	420			None	None			2013-07-26	FEMALE	NO				Thyroid Papillary Carcinoma	Classical/usual		No				Patient did not receive I-131 treatment	C73	8260/3	C73.9	YES	220
TCGA-E8-A416-01	TCGA-E8-A416-01	NA	NA	NA	183	0	428	0	428	0	428	51	<55	45~54	>=45	lessthan55	over45			-18932	66		0	428			None	None			2013-07-26	FEMALE	NO				Thyroid Papillary Carcinoma	Classical/usual		No				Patient did not receive I-131 treatment	C73	8260/3	C73.9	YES	330
TCGA-E8-A417-01	TCGA-E8-A417-01	NA	NA	NA	184	0	434	0	434	0	434	38	<55	<45	<45	lessthan55	lessthan45			-14019	52		0	434			None	None			2013-08-05	FEMALE	NO				Thyroid Papillary Carcinoma	Classical/usual		No				Patient did not receive I-131 treatment	C73	8260/3	C73.9	YES	370
TCGA-E8-A418-01	TCGA-E8-A418-01	V600E	NA	NA	185	0	92	0	92	0	92	75	>=55	>=55	>=45	over55	over45			-27737	205		0	92			Moderate/Advanced (T4a)	Gross			2013-12-10	FEMALE					Thyroid Papillary Carcinoma	Classical/usual		No				Patient did not receive I-131 treatment	C73	8260/3	C73.9	YES	1120
TCGA-E8-A419-01	TCGA-E8-A419-01	V600E	NA	NA	186	0	774	0	774	0	774	30	<55	<45	<45	lessthan55	lessthan45			-11306	125		0	774			None	None			2014-10-02	FEMALE					Thyroid Papillary Carcinoma	Classical/usual		No					C73	8260/3	C73.9	YES	820
TCGA-E8-A432-01	TCGA-E8-A432-01	NA	NA	NA	187	0	439	0	439	0	439	57	>=55	>=55	>=45	over55	over45			-20874	98		0	439			None	None			2013-07-23	FEMALE					Thyroid Papillary Carcinoma	Classical/usual		No				Patient did not receive I-131 treatment	C73	8260/3	C73.9	YES	580
TCGA-E8-A433-01	TCGA-E8-A433-01	V600E	NA	NA	188	0	447	0	447	0	447	25	<55	<45	<45	lessthan55	lessthan45			-9145	84		0	447			None	None			2013-09-09	FEMALE					Thyroid Papillary Carcinoma	Classical/usual		No				Patient did not receive I-131 treatment	C73	8260/3	C73.9	YES	650
TCGA-E8-A434-01	TCGA-E8-A434-01	NA	NA	NA	189	0	429	0	429	0	429	56	>=55	>=55	>=45	over55	over45			-20492			0	429			None	None	Parent		2013-07-26	FEMALE					Thyroid Papillary Carcinoma	Classical/usual		No				Patient did not receive I-131 treatment	C73	8260/3	C73.9	YES
TCGA-E8-A436-01	TCGA-E8-A436-01	V600E	NA	NA	190	0	455	0	455	0	455	53	<55	45~54	>=45	lessthan55	over45			-19640	114		0	455			None	None			2013-07-23	FEMALE					Thyroid Papillary Carcinoma	Classical/usual		No				Patient did not receive I-131 treatment	C73	8260/3	C73.9	YES	900
TCGA-E8-A437-01	TCGA-E8-A437-01	V600E	NA	NA	191	0	234	0	234	0	234	57	>=55	>=55	>=45	over55	over45			-21073	458		0	234			None	None			2012-11-20	FEMALE	NO				Thyroid Papillary Carcinoma	Classical/usual		No					C73	8260/3	C73.9	YES	110
TCGA-E8-A438-01	TCGA-E8-A438-01	NA	NA	NA	192	0	629	0	629	0	629	23	<55	<45	<45	lessthan55	lessthan45			-8752	271		0	629			None	None			2013-08-08	FEMALE					Thyroid Papillary Carcinoma	Classical/usual		No				Patient did not receive I-131 treatment	C73	8260/3	C73.9	YES	290
TCGA-E8-A44K-01	TCGA-E8-A44K-01	V600E	NA	NA	193	0	419	0	419	0	419	50	<55	45~54	>=45	lessthan55	over45			-18472	98		0	419			None	None			2013-07-23	FEMALE					Thyroid Papillary Carcinoma	Classical/usual		No				Patient did not receive I-131 treatment	C73	8260/3	C73.9	YES	450
TCGA-E8-A44M-01	TCGA-E8-A44M-01	NA	NA	NA	194	0	413	0	413	0	413	23	<55	<45	<45	lessthan55	lessthan45			-8523	72		0	413			None	None			2013-09-10	FEMALE					Thyroid Papillary Carcinoma	Classical/usual		No				Patient did not receive I-131 treatment	C73	8260/3	C73.9	YES	210
TCGA-EL-A3CL-01	TCGA-EL-A3CL-01	V600E	NA	NA	195	1	963	1	963	0	963	70	>=55	>=55	>=45	over55	over45			-25761	6425	963	0				None	None			2013-03-08	FEMALE					Thyroid Papillary Carcinoma	Classical/usual		No					C73	8260/3	C73.9	YES	190
TCGA-EL-A3CM-01	TCGA-EL-A3CM-01	V600E	NA	NA	196	1	813	1	813	0	813	64	>=55	>=55	>=45	over55	over45			-23406	5462	813	0				Minimal (T3)	Microscopic			2013-03-08	FEMALE					Thyroid Papillary Carcinoma	Classical/usual		No				Patient did not receive I-131 treatment	C73	8260/3	C73.9	YES	260
TCGA-EL-A3CN-01	TCGA-EL-A3CN-01	V600E	NA	NA	197	0	4731	0	4731	0	4731	47	<55	45~54	>=45	lessthan55	over45			-17456	4586		0	4731			Minimal (T3)	Microscopic			2013-04-01	FEMALE					Thyroid Papillary Carcinoma	Classical/usual		No				Patient did not receive I-131 treatment	C73	8260/3	C73.9	YES	210
TCGA-EL-A3CO-01	TCGA-EL-A3CO-01	NA	NA	NA	198	1	2973	1	2973	0	2973	88	>=55	>=55	>=45	over55	over45			-32146	4439	2973	0				Minimal (T3)	Microscopic			2013-03-08	MALE					Thyroid Papillary Carcinoma	Classical/usual		No				Patient did not receive I-131 treatment	C73	8260/3	C73.9	YES	220
TCGA-EL-A3CP-01	TCGA-EL-A3CP-01	V600E	NA	NA	199	0	4831	0	4831	0	4831	50	<55	45~54	>=45	lessthan55	over45			-18298	4341		0	4831			None	None			2013-03-29	FEMALE					Thyroid Papillary Carcinoma	Follicular (>= 99% follicular patterned)		No				Patient did not receive I-131 treatment	C73	8340/3	C73.9	YES	230
TCGA-EL-A3CR-01	TCGA-EL-A3CR-01	V600E	NA	NA	200	1	233	1	233	0	233	78	>=55	>=55	>=45	over55	over45			-28785	3278	233	0				Minimal (T3)	Microscopic			2013-03-11	FEMALE					Thyroid Papillary Carcinoma	Classical/usual		No					C73	8260/3	C73.9	YES	230
TCGA-EL-A3CS-01	TCGA-EL-A3CS-01	V600E	NA	NA	201	1	1385	1	1385	0	1385	62	>=55	>=55	>=45	over55	over45			-22993	2746	1385	0				Moderate/Advanced (T4a)	Gross			2012-10-12	FEMALE					Thyroid Papillary Carcinoma	Classical/usual		Yes					C73	8260/3	C73.9	YES	240
TCGA-EL-A3CT-01	TCGA-EL-A3CT-01	V600E	NA	NA	202	1	1854	1	1854	0	1854	78	>=55	>=55	>=45	over55	over45			-28597	2639	1854	0				Moderate/Advanced (T4a)	Gross			2013-03-15	FEMALE					Thyroid Papillary Carcinoma	Classical/usual		No				Patient did not receive I-131 treatment	C73	8260/3	C73.9	YES	230
TCGA-EL-A3CU-01	TCGA-EL-A3CU-01	V600E	NA	NA	203	0	4780	0	4780	0	4780	70	>=55	>=55	>=45	over55	over45			-25881	4278		0	4780			None	None			2013-03-29	FEMALE					Thyroid Papillary Carcinoma	Classical/usual		No				Patient did not receive I-131 treatment	C73	8260/3	C73.9	YES	240
TCGA-EL-A3CV-01	TCGA-EL-A3CV-01	V600E	NA	NA	204	0	1154	0	1154	0	1154	40	<55	<45	<45	lessthan55	lessthan45			-14785	2352		0	1154			Minimal (T3)	Microscopic			2013-03-29	MALE					Thyroid Papillary Carcinoma	Classical/usual		No			100	rhTSH	C73	8260/3	C73.9	YES	290
TCGA-EL-A3CW-01	TCGA-EL-A3CW-01	V600E	NA	NA	205	1	1734	1	1734	0	1734	87	>=55	>=55	>=45	over55	over45			-31934	4171	1734	0				None	None			2012-10-12	FEMALE					Thyroid Papillary Carcinoma	Classical/usual		No					C73	8260/3	C73.9	YES	200
TCGA-EL-A3CX-01	TCGA-EL-A3CX-01	NA	NA	NA	206	0	2461	0	2461	0	2461	22	<55	<45	<45	lessthan55	lessthan45			-8344	2292		0	2461			None	None			2013-03-29	FEMALE					Thyroid Papillary Carcinoma	Classical/usual		No				Patient did not receive I-131 treatment	C73	8260/3	C73.9	YES	270
TCGA-EL-A3CY-01	TCGA-EL-A3CY-01	NA	NA	NA	207	0	127	0	127	0	127	28	<55	<45	<45	lessthan55	lessthan45			-10423	4097		0	127			None	None			2014-12-18	MALE					Thyroid Papillary Carcinoma	Classical/usual		Yes				Patient did not receive I-131 treatment	C73	8260/3	C73.9	YES	320
TCGA-EL-A3CZ-01	TCGA-EL-A3CZ-01	NA	Q61R	NA	208	0	1789	0	1606	1	1789	37	<55	<45	<45	lessthan55	lessthan45			-13718	1410		0	1789		1606	None	None			2013-03-29	FEMALE					Thyroid Papillary Carcinoma	Classical/usual		No				Patient did not receive I-131 treatment	C73	8260/3	C73.9	YES	240
TCGA-EL-A3D0-01	TCGA-EL-A3D0-01	V600E	NA	NA	209	0	4254	0	4254	0	4254	61	>=55	>=55	>=45	over55	over45			-22622	3829		0	4254			Moderate/Advanced (T4a)	Gross			2014-01-14	MALE					Thyroid Papillary Carcinoma	Classical/usual		No					C73	8260/3	C73.9	YES	270
TCGA-EL-A3D1-01	TCGA-EL-A3D1-01	V600E	NA	NA	210	0	2997	0	2997	0	2997	39	<55	<45	<45	lessthan55	lessthan45			-14245	2032		0	2997			None	None			2014-12-18	MALE					Thyroid Papillary Carcinoma	Classical/usual		No			100	Thyroxine withdrawal	C73	8260/3	C73.9	YES	260
TCGA-EL-A3D4-01	TCGA-EL-A3D4-01	NA	NA	NA	211	0	1381	0	1381	0	1381	62	>=55	>=55	>=45	over55	over45			-22923	1080		0	1381			Minimal (T3)	Microscopic			2013-03-29	MALE					Thyroid Papillary Carcinoma	Classical/usual		No				Patient did not receive I-131 treatment	C73	8260/3	C73.9	YES	240
TCGA-EL-A3D5-01	TCGA-EL-A3D5-01	NA	NA	NA	212	0	1737	0	1737	0	1737	44	<55	<45	<45	lessthan55	lessthan45			-16217	626		0	1737			Minimal (T3)	Microscopic			2014-12-18	FEMALE					Thyroid Papillary Carcinoma	Classical/usual		No				Patient did not receive I-131 treatment	C73	8260/3	C73.9	YES	210
TCGA-EL-A3D6-01	TCGA-EL-A3D6-01	V600E	NA	NA	213	0	3296	0	3296	0	3296	51	<55	45~54	>=45	lessthan55	over45			-18640	4447		0	3296			Minimal (T3)	Microscopic			2013-03-29	FEMALE					Thyroid Papillary Carcinoma	Classical/usual		No				Patient did not receive I-131 treatment	C73	8260/3	C73.9	YES	210
TCGA-EL-A3GO-01	TCGA-EL-A3GO-01	NA	NA	NA	214	0	1196	0	1196	0	1196	31	<55	<45	<45	lessthan55	lessthan45			-11604	1128		0	1196			None	None			2013-03-07	FEMALE					Thyroid Papillary Carcinoma	Classical/usual		No				Patient did not receive I-131 treatment	C73	8260/3	C73.9	YES	220
TCGA-EL-A3GP-01	TCGA-EL-A3GP-01	V600E	NA	NA	215	0	43	0	43	0	43	70	>=55	>=55	>=45	over55	over45			-25696	940		0	43			Minimal (T3)	Microscopic			2013-03-20	MALE					Thyroid Papillary Carcinoma	Classical/usual		No				Patient did not receive I-131 treatment	C73	8260/3	C73.9	YES	190
TCGA-EL-A3GQ-01	TCGA-EL-A3GQ-01	V600E	NA	NA	216	0	1528	0	1528	0	1528	72	>=55	>=55	>=45	over55	over45			-26478	596		0	1528			None	None			2014-12-18	FEMALE					Thyroid Papillary Carcinoma	Follicular (>= 99% follicular patterned)		No					C73	8340/3	C73.9	YES	230
TCGA-EL-A3GR-01	TCGA-EL-A3GR-01	V600E	NA	NA	217	0	3501	0	3501	0	3501	31	<55	<45	<45	lessthan55	lessthan45			-11598	2746		0	3501			Minimal (T3)	Microscopic			2014-01-10	FEMALE					Thyroid Papillary Carcinoma	Classical/usual		No		107 mCi		Patient did not receive I-131 treatment	C73	8260/3	C73.9	YES	220
TCGA-EL-A3GS-01	TCGA-EL-A3GS-01	V600E	NA	NA	218	0	1989	0	1989	0	1989	37	<55	<45	<45	lessthan55	lessthan45			-13542	1533		0	1989			Minimal (T3)	Microscopic			2013-03-20	FEMALE					Thyroid Papillary Carcinoma	Classical/usual		No			99 mCi	Patient did not receive I-131 treatment	C73	8260/3	C73.9	YES	230
TCGA-EL-A3GU-01	TCGA-EL-A3GU-01	V600E	NA	NA	219	0	4137	0	4137	0	4137	72	>=55	>=55	>=45	over55	over45			-26632	3486		0	4137			Minimal (T3)	Microscopic			2014-01-24	FEMALE	NO				Thyroid Papillary Carcinoma	Classical/usual		No				Patient did not receive I-131 treatment	C73	8260/3	C73.9	YES	220
TCGA-EL-A3GV-01	TCGA-EL-A3GV-01	V600E	NA	NA	220	0	1532	0	1532	0	1532	65	>=55	>=55	>=45	over55	over45			-23787	1095		0	1532			Minimal (T3)	Microscopic			2013-03-12	FEMALE					Thyroid Papillary Carcinoma	Classical/usual		No			100 mCi	Patient did not receive I-131 treatment	C73	8260/3	C73.9	YES	240
TCGA-EL-A3GW-01	TCGA-EL-A3GW-01	NA	NA	Q61R	221	0	1527	0	1527	0	1527	37	<55	<45	<45	lessthan55	lessthan45			-13670	919		0	1527			None	None			2014-01-28	FEMALE					Thyroid Papillary Carcinoma	Classical/usual		No			100 mCi	Patient did not receive I-131 treatment	C73	8260/3	C73.9	YES	240
TCGA-EL-A3GX-01	TCGA-EL-A3GX-01	V600E	NA	NA	222	0	4494	0	4494	0	4494	41	<55	<45	<45	lessthan55	lessthan45			-15212	4200		0	4494			None	None			2013-03-12	FEMALE					Thyroid Papillary Carcinoma	Classical/usual		No			107	Patient did not receive I-131 treatment	C73	8260/3	C73.9	YES	230
TCGA-EL-A3GY-01	TCGA-EL-A3GY-01	V600E	NA	NA	223	0	3076	0	3076	0	3076	40	<55	<45	<45	lessthan55	lessthan45			-14814	2698		0	3076			None	None			2013-03-29	FEMALE					Thyroid Papillary Carcinoma	Classical/usual		No			100 mCi	Thyroxine withdrawal	C73	8260/3	C73.9	YES	210
TCGA-EL-A3GZ-01	TCGA-EL-A3GZ-01	V600E	NA	NA	224	0	4258	0	4258	0	4258	34	<55	<45	<45	lessthan55	lessthan45			-12665	3741		0	4258			None	None			2013-03-12	FEMALE	NO				Thyroid Papillary Carcinoma	Classical/usual		No			29.9	Patient did not receive I-131 treatment	C73	8260/3	C73.9	YES	200
TCGA-EL-A3H1-01	TCGA-EL-A3H1-01	NA	NA	NA	225	1	1500	1	1500	0	1500	66	>=55	>=55	>=45	over55	over45			-24328	6870	1500	0				None	None			2013-03-07	FEMALE					Thyroid Papillary Carcinoma	Classical/usual		No			100 mCi	Thyroxine withdrawal	C73	8260/3	C73.9	YES	210
TCGA-EL-A3H2-01	TCGA-EL-A3H2-01	NA	NA	NA	226	1	1019	1	1019	0	1019	58	>=55	>=55	>=45	over55	over45			-21266	3292	1019	0				None	None			2013-03-18	MALE					Thyroid Papillary Carcinoma	Classical/usual		Yes				Patient did not receive I-131 treatment	C73	8260/3	C73.9	YES	220
TCGA-EL-A3H3-01	TCGA-EL-A3H3-01	NA	NA	NA	227	0	1319	0	1319	0	1319	19	<55	<45	<45	lessthan55	lessthan45			-7000	1087		0	1319			None	None			2013-03-20	FEMALE					Thyroid Papillary Carcinoma	Classical/usual		No				Patient did not receive I-131 treatment	C73	8260/3	C73.9	YES	280
TCGA-EL-A3H4-01	TCGA-EL-A3H4-01	V600E	NA	NA	228	0	1512	0	1512	0	1512	46	<55	45~54	>=45	lessthan55	over45			-16944	849		0	1512			Moderate/Advanced (T4a)	Gross			2014-01-17	FEMALE					Thyroid Papillary Carcinoma	Classical/usual		No			150	Patient did not receive I-131 treatment	C73	8260/3	C73.9	YES	260
TCGA-EL-A3H5-01	TCGA-EL-A3H5-01	V600E	NA	NA	229	0	2542	0	2542	0	2542	57	>=55	>=55	>=45	over55	over45			-20926	1508		0	2542			Moderate/Advanced (T4a)	Gross			2014-12-18	FEMALE					Thyroid Papillary Carcinoma	Classical/usual		No			150 mCi	Thyroxine withdrawal	C73	8260/3	C73.9	YES	210
TCGA-EL-A3H7-01	TCGA-EL-A3H7-01	V600E	NA	NA	230	0	4228	0	4228	0	4228	36	<55	<45	<45	lessthan55	lessthan45			-13407	3506		0	4228			Minimal (T3)	Microscopic			2014-01-14	FEMALE					Thyroid Papillary Carcinoma	Classical/usual		No				Patient did not receive I-131 treatment	C73	8260/3	C73.9	YES	240
TCGA-EL-A3H8-01	TCGA-EL-A3H8-01	V600E	NA	NA	231	0	3989	0	3989	0	3989	35	<55	<45	<45	lessthan55	lessthan45			-12992	3556		0	3989			Minimal (T3)	Microscopic			2013-03-12	FEMALE					Thyroid Papillary Carcinoma	Classical/usual		No				Patient did not receive I-131 treatment	C73	8260/3	C73.9	YES	220
TCGA-EL-A3MW-01	TCGA-EL-A3MW-01	V600E	NA	NA	232	0	3305	0	3305	0	3305	55	>=55	>=55	>=45	over55	over45			-20186	3067		0	3305			None	None			2013-03-20	FEMALE					Thyroid Papillary Carcinoma	Classical/usual		No				Patient did not receive I-131 treatment	C73	8260/3	C73.9	YES	250
TCGA-EL-A3MX-01	TCGA-EL-A3MX-01	V600E	NA	NA	233	1	1753	1			1753	66	>=55	>=55	>=45	over55	over45			-24178	2906	1753	0				None	None			2013-03-15	FEMALE					Thyroid Papillary Carcinoma	Classical/usual		No				Patient did not receive I-131 treatment	C73	8260/3	C73.9	YES	260
TCGA-EL-A3MY-01	TCGA-EL-A3MY-01	V600E	NA	NA	234	1	533	1	533	0	533	81	>=55	>=55	>=45	over55	over45			-29706	2828	533	0				Moderate/Advanced (T4a)	Gross			2013-03-14	MALE					Thyroid Papillary Carcinoma	Classical/usual		No				Patient did not receive I-131 treatment	C73	8260/3	C73.9	YES	230
TCGA-EL-A3MZ-01	TCGA-EL-A3MZ-01	V600E	NA	NA	235	1	1597	1	1597	0	1597	66	>=55	>=55	>=45	over55	over45			-24208	5035	1597	0				Moderate/Advanced (T4a)	Gross			2013-03-14	MALE					Thyroid Papillary Carcinoma	Classical/usual		No				Patient did not receive I-131 treatment	C73	8260/3	C73.9	YES	210
TCGA-EL-A3N2-01	TCGA-EL-A3N2-01	V600E	NA	NA	236	0	902	0	902	0	902	24	<55	<45	<45	lessthan55	lessthan45			-8989	92		0	902			Minimal (T3)	Microscopic			2014-12-12	FEMALE					Thyroid Papillary Carcinoma	Classical/usual		No				Patient did not receive I-131 treatment	C73	8260/3	C73.9	YES	250
TCGA-EL-A3N3-01	TCGA-EL-A3N3-01	V600E	NA	NA	237	0	4484	0	4484	0	4484	53	<55	45~54	>=45	lessthan55	over45			-19513	4193		0	4484			Minimal (T3)	Microscopic			2013-03-07	FEMALE					Thyroid Papillary Carcinoma	Classical/usual		No			100 mCi	Thyroxine withdrawal	C73	8260/3	C73.9	YES	200
TCGA-EL-A3T0-01	TCGA-EL-A3T0-01	Fusion	NA	NA	238	0	3976	0	3976	0	3976	45	<55	45~54	>=45	lessthan55	over45			-16798	3923		0	3976			Minimal (T3)	Microscopic			2013-03-13	FEMALE					Thyroid Papillary Carcinoma	Classical/usual		No				Patient did not receive I-131 treatment	C73	8260/3	C73.9	YES	240
TCGA-EL-A3T1-01	TCGA-EL-A3T1-01	V600E	NA	NA	239	0	3941	0	3941	0	3941	38	<55	<45	<45	lessthan55	lessthan45			-14025	3629		0	3941			Minimal (T3)	Microscopic			2014-12-12	FEMALE					Thyroid Papillary Carcinoma	Classical/usual		No				Patient did not receive I-131 treatment	C73	8260/3	C73.9	YES	240
TCGA-EL-A3T2-01	TCGA-EL-A3T2-01	NA	NA	Q61R	240	0	988	0	903	1	988	55	>=55	>=55	>=45	over55	over45			-20403	3565		0	988		903	None	None			2014-12-18	FEMALE					Thyroid Papillary Carcinoma	Classical/usual		No				Patient did not receive I-131 treatment	C73	8260/3	C73.9	YES	220
TCGA-EL-A3T3-01	TCGA-EL-A3T3-01	V600E	NA	NA	241	0	4017	0	4017	0	4017	63	>=55	>=55	>=45	over55	over45			-23043	3495		0	4017			None	None			2014-01-28	MALE					Thyroid Papillary Carcinoma	Classical/usual		No	108.9 mCi	n/a	108.9 mCi	Patient did not receive I-131 treatment	C73	8260/3	C73.9	YES	280
TCGA-EL-A3T6-01	TCGA-EL-A3T6-01	V600E	NA	NA	242	0	2988	0	2988	0	2988	34	<55	<45	<45	lessthan55	lessthan45			-12777	3292		0	2988			None	None			2013-03-20	FEMALE					Thyroid Papillary Carcinoma	Classical/usual		No				Patient did not receive I-131 treatment	C73	8260/3	C73.9	YES	310
TCGA-EL-A3T7-01	TCGA-EL-A3T7-01	V600E	NA	NA	243	0	1256	0	1256	0	1256	47	<55	45~54	>=45	lessthan55	over45			-17302	2718		0	1256			Minimal (T3)	Microscopic			2013-03-20	FEMALE					Thyroid Papillary Carcinoma	Classical/usual		No					C73	8260/3	C73.9	YES	200
TCGA-EL-A3T8-01	TCGA-EL-A3T8-01	V600E	NA	NA	244	0	3269	0	3269	0	3269	36	<55	<45	<45	lessthan55	lessthan45			-13290	2568		0	3269			None	None			2014-03-07	MALE					Thyroid Papillary Carcinoma	Classical/usual		No				Patient did not receive I-131 treatment	C73	8260/3	C73.9	YES	260
TCGA-EL-A3T9-01	TCGA-EL-A3T9-01	NA	NA	NA	245	1	174	1	174	0	174	69	>=55	>=55	>=45	over55	over45			-25484	2492	174	0				Very Advanced (T4b)	Gross			2013-03-15	FEMALE					Thyroid Papillary Carcinoma	Classical/usual		No					C73	8260/3	C73.9	YES	270
TCGA-EL-A3TA-01	TCGA-EL-A3TA-01	V600E	NA	NA	246	0	2035	0	2035	0	2035	42	<55	<45	<45	lessthan55	lessthan45			-15366	2457		0	2035			None	None			2013-03-20	MALE					Thyroid Papillary Carcinoma	Classical/usual		No				Patient did not receive I-131 treatment	C73	8260/3	C73.9	YES	270
TCGA-EL-A3TB-01	TCGA-EL-A3TB-01	NA	NA	NA	247	0	2519	0	2519	0	2519	47	<55	45~54	>=45	lessthan55	over45			-17195	2443		0	2519			Minimal (T3)	Microscopic			2014-03-07	FEMALE					Thyroid Papillary Carcinoma	Classical/usual		No				Patient did not receive I-131 treatment	C73	8260/3	C73.9	YES	220
TCGA-EL-A3ZG-01	TCGA-EL-A3ZG-01	NA	NA	NA	248	0	2724	0	2724	0	2724	15	<55	<45	<45	lessthan55	lessthan45	v 600 E		-5612	2291		0	2724			Minimal (T3)	Microscopic			2014-01-24	MALE	YES				Thyroid Papillary Carcinoma	Classical/usual		No			100 mCi	Patient did not receive I-131 treatment	C73	8260/3	C73.9	YES	280
TCGA-EL-A3ZH-01	TCGA-EL-A3ZH-01	NA	NA	Q61R	249	0	2402	0	2402	0	2402	42	<55	<45	<45	lessthan55	lessthan45			-15685	2228		0	2402			Minimal (T3)	Microscopic			2014-01-10	FEMALE					Thyroid Papillary Carcinoma	Classical/usual		No			109 mCi	Thyroxine withdrawal	C73	8260/3	C73.9	YES	250
TCGA-EL-A3ZK-01	TCGA-EL-A3ZK-01	Fusion	NA	NA	250	0	958	0	958	0	958	41	<55	<45	<45	lessthan55	lessthan45			-15121	1646		0	958			None	None			2013-03-20	FEMALE					Thyroid Papillary Carcinoma	Classical/usual		No			115 mCi	Patient did not receive I-131 treatment	C73	8260/3	C73.9	YES	230
TCGA-EL-A3ZL-01	TCGA-EL-A3ZL-01	NA	NA	NA	251	0	1895	0	1895	0	1895	34	<55	<45	<45	lessthan55	lessthan45			-12649	1595		0	1895			None	None			2013-04-18	FEMALE					Thyroid Papillary Carcinoma	Classical/usual		No			100 mCi	Patient did not receive I-131 treatment	C73	8260/3	C73.9	YES	220
TCGA-EL-A3ZM-01	TCGA-EL-A3ZM-01	NA	NA	NA	252	0	1096	0	1096	0	1096	60	>=55	>=55	>=45	over55	over45			-21987	1554		0	1096			Moderate/Advanced (T4a)	Gross			2013-03-20	MALE	NO				Thyroid Papillary Carcinoma	Classical/usual		No			150 mCi	Thyroxine withdrawal	C73	8260/3	C73.9	YES	240
TCGA-EL-A3ZN-01	TCGA-EL-A3ZN-01	NA	NA	NA	253	0	1614	0	1614	0	1614	28	<55	<45	<45	lessthan55	lessthan45			-10266	1515		0	1614			Minimal (T3)	Microscopic			2014-01-23	FEMALE					Thyroid Papillary Carcinoma	Classical/usual		No				Patient did not receive I-131 treatment	C73	8260/3	C73.9	YES	190
TCGA-EL-A3ZO-01	TCGA-EL-A3ZO-01	NA	NA	NA	254	0	1441	0	1441	0	1441	79	>=55	>=55	>=45	over55	over45			-28924	1492		0	1441			Minimal (T3)	Microscopic			2013-03-07	FEMALE					Thyroid Papillary Carcinoma	Classical/usual		No			100 mCi	Thyroxine withdrawal	C73	8260/3	C73.9	YES	230
TCGA-EL-A3ZP-01	TCGA-EL-A3ZP-01	NA	NA	NA	255	0	1597	0	1597	0	1597	19	<55	<45	<45	lessthan55	lessthan45			-7101	1393		0	1597			Moderate/Advanced (T4a)	Gross			2013-03-20	MALE					Thyroid Papillary Carcinoma	Classical/usual		No			150 mCi	Patient did not receive I-131 treatment	C73	8260/3	C73.9	YES	270
TCGA-EL-A3ZQ-01	TCGA-EL-A3ZQ-01	V600E	NA	NA	256	0	1862	0	1862	0	1862	78	>=55	>=55	>=45	over55	over45			-28783	1360		0	1862			None	None			2014-01-27	FEMALE					Thyroid Papillary Carcinoma	Classical/usual		No			101 mCi	Patient did not receive I-131 treatment	C73	8260/3	C73.9	YES	290
TCGA-EL-A3ZR-01	TCGA-EL-A3ZR-01	NA	Q61R	NA	257	0	1830	0	1830	0	1830	46	<55	45~54	>=45	lessthan55	over45			-16852	1332		0	1830			None	None			2014-01-14	FEMALE					Thyroid Papillary Carcinoma	Classical/usual		No			101.2 mCi	Patient did not receive I-131 treatment	C73	8260/3	C73.9	YES	240
TCGA-EL-A3ZS-01	TCGA-EL-A3ZS-01	NA	NA	NA	258	0	215	0	215	0	215	22	<55	<45	<45	lessthan55	lessthan45			-8076	1315		0	215			None	None			2013-03-20	FEMALE					Thyroid Papillary Carcinoma	Classical/usual		No			75 mCi	Thyroxine withdrawal	C73	8260/3	C73.9	YES	240
TCGA-EL-A3ZT-01	TCGA-EL-A3ZT-01	V600E	NA	NA	259	0	1808	0	1808	0	1808	35	<55	<45	<45	lessthan55	lessthan45			-13103	1311		0	1808			Minimal (T3)	Microscopic			2014-01-24	MALE					Thyroid Papillary Carcinoma	Classical/usual		No			100 mCi	Patient did not receive I-131 treatment	C73	8260/3	C73.9	YES	170
TCGA-EL-A4JV-01	TCGA-EL-A4JV-01	NA	Q61R	NA	260	0	1748	0	1748	0	1748	41	<55	<45	<45	lessthan55	lessthan45			-15065	1304		0	1748			None	None			2014-01-10	FEMALE					Thyroid Papillary Carcinoma	Classical/usual		No				Patient did not receive I-131 treatment	C73	8260/3	C73.9	YES	260
TCGA-EL-A4JW-01	TCGA-EL-A4JW-01	V600E	NA	NA	261	0	1056	0	1056	0	1056	38	<55	<45	<45	lessthan55	lessthan45			-13928	1295		0	1056			None	None			2013-03-29	FEMALE					Thyroid Papillary Carcinoma	Classical/usual		No				Patient did not receive I-131 treatment	C73	8260/3	C73.9	YES	300
TCGA-EL-A4JX-01	TCGA-EL-A4JX-01	V600E	NA	NA	262	0	1398	0	1398	0	1398	31	<55	<45	<45	lessthan55	lessthan45			-11465	1269		0	1398			None	None			2014-12-12	FEMALE					Thyroid Papillary Carcinoma	Classical/usual		No				Patient did not receive I-131 treatment	C73	8260/3	C73.9	YES	220
TCGA-EL-A4JZ-01	TCGA-EL-A4JZ-01	V600E	NA	NA	263	0	1154	0	1154	0	1154	55	>=55	>=55	>=45	over55	over45			-20290	1079		0	1154			Minimal (T3)	Microscopic			2014-01-10	FEMALE					Thyroid Papillary Carcinoma	Classical/usual		No				Patient did not receive I-131 treatment	C73	8260/3	C73.9	YES	300
TCGA-EL-A4K0-01	TCGA-EL-A4K0-01	V600E	NA	NA	264	0	944	0	944	0	944	54	<55	45~54	>=45	lessthan55	over45			-20042	757		0	944			None	None			2013-04-01	FEMALE					Thyroid Papillary Carcinoma	Classical/usual		No				Patient did not receive I-131 treatment	C73	8260/3	C73.9	YES	200
TCGA-EL-A4K1-01	TCGA-EL-A4K1-01	NA	NA	NA	265	0	1046	0	1046	0	1046	68	>=55	>=55	>=45	over55	over45			-24846	753		0	1046			None	None			2013-04-18	FEMALE					Thyroid Papillary Carcinoma	Classical/usual		No				Patient did not receive I-131 treatment	C73	8260/3	C73.9	YES	200
TCGA-EL-A4K2-01	TCGA-EL-A4K2-01	NA	NA	Q61R	266	0	928	0	928	0	928	43	<55	<45	<45	lessthan55	lessthan45			-15962	708		0	928			None	None			2014-03-07	FEMALE					Thyroid Papillary Carcinoma	Classical/usual		No				Patient did not receive I-131 treatment	C73	8260/3	C73.9	YES	240
TCGA-EL-A4K4-01	TCGA-EL-A4K4-01	V600E	NA	NA	267	0	1022	0	1022	0	1022	33	<55	<45	<45	lessthan55	lessthan45			-12368	899		0	1022			Minimal (T3)	Microscopic			2013-03-13	FEMALE					Thyroid Papillary Carcinoma	Classical/usual		No					C73	8260/3	C73.9	YES	230
TCGA-EL-A4K6-01	TCGA-EL-A4K6-01	NA	NA	Q61K	268	0	1343	0	874	1	1343	75	>=55	>=55	>=45	over55	over45			-27416	750		0	1343		874	Minimal (T3)	Microscopic			2014-12-12	MALE			YES		Thyroid Papillary Carcinoma	Classical/usual		No				Patient did not receive I-131 treatment	C73	8260/3	C73.9	YES	210
TCGA-EL-A4K7-01	TCGA-EL-A4K7-01	NA	NA	NA	269	0	1251	0	1251	0	1251	74	>=55	>=55	>=45	over55	over45			-27306	1121		0	1251			Minimal (T3)	Microscopic			2013-03-20	MALE					Thyroid Papillary Carcinoma	Classical/usual		No				Patient did not receive I-131 treatment	C73	8260/3	C73.9	YES	220
TCGA-EL-A4K9-01	TCGA-EL-A4K9-01	NA	NA	NA	270	0	1455	0	1455	0	1455	68	>=55	>=55	>=45	over55	over45			-24980	1114		0	1455			Minimal (T3)	Microscopic			2014-12-12	MALE					Thyroid Papillary Carcinoma	Classical/usual		No					C73	8260/3	C73.9	YES	210
TCGA-EL-A4KD-01	TCGA-EL-A4KD-01	NA	NA	NA	271	0	1326	0	1326	0	1326	41	<55	<45	<45	lessthan55	lessthan45			-15291	921		0	1326			Minimal (T3)	Microscopic			2014-01-23	MALE					Thyroid Papillary Carcinoma	Classical/usual		No	155 mCi	n/a	155 mCi	Patient did not receive I-131 treatment	C73	8260/3	C73.9	YES	200
TCGA-EL-A4KG-01	TCGA-EL-A4KG-01	V600E	NA	NA	272	0	739	0	739	0	739	35	<55	<45	<45	lessthan55	lessthan45			-12978	260		0	739			Minimal (T3)	Microscopic			2014-03-07	FEMALE					Thyroid Papillary Carcinoma	Classical/usual		No				Patient did not receive I-131 treatment	C73	8260/3	C73.9	YES	190
TCGA-EL-A4KH-01	TCGA-EL-A4KH-01	V600E	NA	NA	273	0	823	0	823	0	823	36	<55	<45	<45	lessthan55	lessthan45			-13275	238		0	823			None	None			2014-12-12	FEMALE					Thyroid Papillary Carcinoma	Classical/usual		No				Patient did not receive I-131 treatment	C73	8260/3	C73.9	YES	320
TCGA-EL-A4KI-01	TCGA-EL-A4KI-01	NA	NA	Q61R	274	0	727	0	265	1	727	63	>=55	>=55	>=45	over55	over45			-23182	254		0	727		265	Minimal (T3)	Microscopic			2014-12-12	MALE			YES		Thyroid Papillary Carcinoma	Classical/usual		No				Patient did not receive I-131 treatment	C73	8260/3	C73.9	YES	310
TCGA-EM-A1CS-01	TCGA-EM-A1CS-01	NA	NA	NA	275	0	817	0	817	0	817	55	>=55	>=55	>=45	over55	over45			-20284	527		0	817			None	None		Scheduled Follow-up Submission	2012-05-25	FEMALE					Thyroid Papillary Carcinoma	Classical/usual		No				Patient did not receive I-131 treatment	C73	8260/3	C73.9	YES	100
TCGA-EM-A1CT-01	TCGA-EM-A1CT-01	V600E	NA	NA	276	0	553	0	553	0	553	76	>=55	>=55	>=45	over55	over45			-27944	113		0	553			None	None		Scheduled Follow-up Submission	2012-05-25	MALE					Thyroid Papillary Carcinoma	Classical/usual		No	100 mCi			rhTSH	C73	8260/3	C73.9	YES	120
TCGA-EM-A1CU-01	TCGA-EM-A1CU-01	V600E	NA	NA	277	0	636	0	636	0	636	31	<55	<45	<45	lessthan55	lessthan45			-11470	210		0	636			None	None		Scheduled Follow-up Submission	2012-05-25	MALE					Thyroid Papillary Carcinoma	Classical/usual		No	100 mCi			Thyroxine withdrawal	C73	8260/3	C73.9	YES	100
TCGA-EM-A1CV-01	TCGA-EM-A1CV-01	V600E	NA	NA	278	0	376	0	376	0	376	32	<55	<45	<45	lessthan55	lessthan45			-11932	54		0	376			None	None	Sibling	Scheduled Follow-up Submission	2012-05-25	FEMALE					Thyroid Papillary Carcinoma	Classical/usual		No				Patient did not receive I-131 treatment	C73	8260/3	C73.9	YES	140
TCGA-EM-A1CW-01	TCGA-EM-A1CW-01	NA	NA	NA	279	0	549	0	549	0	549	39	<55	<45	<45	lessthan55	lessthan45			-14263	249		0	549			None	None		Scheduled Follow-up Submission	2012-05-25	FEMALE					Thyroid Papillary Carcinoma	Follicular (>= 99% follicular patterned)		No	107 mCi			rhTSH	C73	8330/9	C73.9	YES	140
TCGA-EM-A1YA-01	TCGA-EM-A1YA-01	NA	NA	NA	280	0	602	0	602	0	602	74	>=55	>=55	>=45	over55	over45			-27224	290		0	602			None	None		Scheduled Follow-up Submission	2012-05-25	FEMALE	NO				Thyroid Papillary Carcinoma	Follicular (>= 99% follicular patterned)		No	100 mCi		100 mCi	rhTSH	C73	8260/3	C73.9	YES	120
TCGA-EM-A1YB-01	TCGA-EM-A1YB-01	NA	NA	NA	281	0	592	0	592	0	592	73	>=55	>=55	>=45	over55	over45			-26852	171		0	592			None	None		Scheduled Follow-up Submission	2012-05-25	FEMALE	NO				Thyroid Papillary Carcinoma	Follicular (>= 99% follicular patterned)		No	30 mCi			Thyroxine withdrawal	C73	8260/3	C73.9	YES	120
TCGA-EM-A1YC-01	TCGA-EM-A1YC-01	NA	NA	NA	282	0	2391	0	2391	0	2391	71	>=55	>=55	>=45	over55	over45			-26143	1326		0	2391			None	None		Scheduled Follow-up Submission	2014-08-28	FEMALE	NO				Thyroid Papillary Carcinoma	Follicular (>= 99% follicular patterned)		No	107 mCi	No	107 mCi	Thyroxine withdrawal	C73	8260/3	C73.9	YES	140
TCGA-EM-A1YD-01	TCGA-EM-A1YD-01	NA	NA	NA	283	0	1734	0	1734	0	1734	53	<55	45~54	>=45	lessthan55	over45			-19366	1372		0	1734			None	None		Scheduled Follow-up Submission	2012-05-25	FEMALE	NO				Thyroid Papillary Carcinoma	Follicular (>= 99% follicular patterned)		No					C73	8340/3	C73.9	YES	120
TCGA-EM-A1YE-01	TCGA-EM-A1YE-01	NA	NA	NA	284	0	1645	0	1645	0	1645	47	<55	45~54	>=45	lessthan55	over45			-17297	1409		0	1645			None	None		Scheduled Follow-up Submission	2012-05-25	FEMALE	NO				Thyroid Papillary Carcinoma	Follicular (>= 99% follicular patterned)		No	103 mCi / 3811 MBq			Thyroxine withdrawal	C73	8340/3	C73.9	YES	130
TCGA-EM-A22I-01	TCGA-EM-A22I-01	V600E	NA	NA	285	0	448	0	448	0	448	52	<55	45~54	>=45	lessthan55	over45			-19003	77		0	448			Minimal (T3)	Microscopic		Scheduled Follow-up Submission	2012-05-17	FEMALE	NO				Thyroid Papillary Carcinoma	Classical/usual		No	100 mci		100mci	Thyroxine withdrawal	C73	8260/3	C73.9	YES	130
TCGA-EM-A22J-01	TCGA-EM-A22J-01	NA	NA	Q61R	286	0	441	0	441	0	441	56	>=55	>=55	>=45	over55	over45			-20539	70		0	441			None	None		Scheduled Follow-up Submission	2012-05-18	FEMALE	NO				Thyroid Papillary Carcinoma	Follicular (>= 99% follicular patterned)		No	75mci			rhTSH	C73	8260/3	C73.9	YES	130
TCGA-EM-A22K-01	TCGA-EM-A22K-01	NA	Q61K	NA	287	0	479	0	479	0	479	46	<55	45~54	>=45	lessthan55	over45			-16890	66		0	479			None	None		Scheduled Follow-up Submission	2012-05-18	FEMALE	NO				Thyroid Papillary Carcinoma	Classical/usual		No	100 mCi			Thyroxine withdrawal	C73	8260/3	C73.9	YES	50
TCGA-EM-A22L-01	TCGA-EM-A22L-01	NA	NA	Q61K	288	0	318	0	318	0	318	33	<55	<45	<45	lessthan55	lessthan45			-12092	72		0	318			None	None		Scheduled Follow-up Submission	2012-05-18	FEMALE	NO				Thyroid Papillary Carcinoma	Follicular (>= 99% follicular patterned)		No					C73	8340/3	C73.9	YES	110
TCGA-EM-A22M-01	TCGA-EM-A22M-01	V600E	NA	NA	289	0	442	0	442	0	442	52	<55	45~54	>=45	lessthan55	over45			-19059	50		0	442			None	None		Scheduled Follow-up Submission	2012-05-18	MALE	NO				Thyroid Papillary Carcinoma	Classical/usual		No	100 mCi			Thyroxine withdrawal	C73	8260/3	C73.9	YES	120
TCGA-EM-A22N-01	TCGA-EM-A22N-01	NA	NA	NA	290	0	324	0	324	0	324	68	>=55	>=55	>=45	over55	over45			-25035			0	324			None	None		Scheduled Follow-up Submission	2012-05-18	FEMALE	NO				Thyroid Papillary Carcinoma	Follicular (>= 99% follicular patterned)		No	75 mCi			Thyroxine withdrawal	C73	8340/3	C73.9	YES
TCGA-EM-A22O-01	TCGA-EM-A22O-01	V600E	NA	NA	291	0	357	0	357	0	357	75	>=55	>=55	>=45	over55	over45			-27758	42		0	357			Moderate/Advanced (T4a)	Gross		Scheduled Follow-up Submission	2012-05-18	MALE	NO				Thyroid Papillary Carcinoma	Classical/usual		No	150 mCi			Thyroxine withdrawal	C73	8260/3	C73.9	YES	130
TCGA-EM-A22P-01	TCGA-EM-A22P-01	V600E	NA	NA	292	0	339	0	339	0	339	64	>=55	>=55	>=45	over55	over45			-23723	31		0	339			None	None		Scheduled Follow-up Submission	2012-05-18	MALE	NO				Thyroid Papillary Carcinoma	Classical/usual		No	153 mCi			Thyroxine withdrawal	C73	8260/3	C73.9	YES	120
TCGA-EM-A22Q-01	TCGA-EM-A22Q-01	NA	NA	Q61K	293	0	433	0	433	0	433	36	<55	<45	<45	lessthan55	lessthan45			-13341	34		0	433			None	None		Scheduled Follow-up Submission	2012-05-18	MALE	NO				Thyroid Papillary Carcinoma	Follicular (>= 99% follicular patterned)		No	102.6 mCi			Thyroxine withdrawal	C73	8340/3	C73.9	YES	100
TCGA-EM-A2CJ-01	TCGA-EM-A2CJ-01	NA	NA	NA	294	0	500	0	500	0	500	49	<55	45~54	>=45	lessthan55	over45			-18168	231		0	500			None	None			2012-11-23	FEMALE	NO				Thyroid Papillary Carcinoma	Follicular (>= 99% follicular patterned)		No				Patient did not receive I-131 treatment	C73	8340/3	C73.9	YES	140
TCGA-EM-A2CK-01	TCGA-EM-A2CK-01	NA	Q61R	NA	295	0	544	0	544	0	544	28	<55	<45	<45	lessthan55	lessthan45			-10485	163		0	544			None	None			2012-11-23	MALE	NO				Thyroid Papillary Carcinoma	Follicular (>= 99% follicular patterned)		No	100 MCI		100 MCI	Thyroxine withdrawal	C73	8340/3	C73.9	YES	100
TCGA-EM-A2CL-01	TCGA-EM-A2CL-01	NA	NA	NA	296	0	401	0	401	0	401	31	<55	<45	<45	lessthan55	lessthan45			-11649	164		0	401			None	None			2012-11-23	MALE	NO				Thyroid Papillary Carcinoma	Follicular (>= 99% follicular patterned)		No				Patient did not receive I-131 treatment	C73	8340/3	C73.9	YES	100
TCGA-EM-A2CM-01	TCGA-EM-A2CM-01	NA	NA	NA	297	0	357	0	357	0	357	62	>=55	>=55	>=45	over55	over45			-22726	176		0	357			None	None			2012-11-23	FEMALE	NO				Other specify		Poorly Differentiated Oncocytic Carcinoma	No	125		125	Thyroxine withdrawal	C73	8010/3	C73.9	YES	100
TCGA-EM-A2CN-01	TCGA-EM-A2CN-01	NA	NA	Q61R	298	0	715	0	715	0	715	62	>=55	>=55	>=45	over55	over45			-22817	163		0	715			None	None			2013-03-20	MALE	NO				Thyroid Papillary Carcinoma	Follicular (>= 99% follicular patterned)		No	200 MCi	yes	400 MCI	Thyroxine withdrawal	C73	8340/3	C73.9	YES	100
TCGA-EM-A2CO-01	TCGA-EM-A2CO-01	NA	NA	NA	299	0	184	0	184	0	184	77	>=55	>=55	>=45	over55	over45			-28424	132		0	184			None	None			2012-11-23	FEMALE	NO				Thyroid Papillary Carcinoma	Follicular (>= 99% follicular patterned)		No	75mci		75mci	Thyroxine withdrawal	C73	8340/3	C73.9	YES	150
TCGA-EM-A2CP-01	TCGA-EM-A2CP-01	NA	NA	NA	300	0	91	0			91	26	<55	<45	<45	lessthan55	lessthan45			-9759	134		0	91			None	None			2012-11-23	FEMALE	NO				Thyroid Papillary Carcinoma	Follicular (>= 99% follicular patterned)		No					C73	8340/3	C73.9	YES	110
TCGA-EM-A2CQ-01	TCGA-EM-A2CQ-01	NA	NA	NA	301	0	374	0	374	0	374	40	<55	<45	<45	lessthan55	lessthan45			-14776	130		0	374			None	None			2012-11-23	FEMALE	NO				Thyroid Papillary Carcinoma	Follicular (>= 99% follicular patterned)		No				Patient did not receive I-131 treatment	C73	8340/3	C73.9	YES	100
TCGA-EM-A2CR-01	TCGA-EM-A2CR-01	NA	NA	Q61R	302	0	415	0	415	0	415	46	<55	45~54	>=45	lessthan55	over45			-16807	132		0	415			None	None			2012-11-23	FEMALE	NO				Thyroid Papillary Carcinoma	Follicular (>= 99% follicular patterned)		No				Patient did not receive I-131 treatment	C73	8340/3	C73.9	YES	100
TCGA-EM-A2CS-01	TCGA-EM-A2CS-01	NA	NA	NA	303	0	491	0	491	0	491	51	<55	45~54	>=45	lessthan55	over45			-18990	135		0	491			None	None	Sibling		2012-11-23	FEMALE	NO				Thyroid Papillary Carcinoma	Classical/usual		No	150		150	Thyroxine withdrawal	C73	8342/3	C73.9	YES	130
TCGA-EM-A2CT-01	TCGA-EM-A2CT-01	NA	NA	Q61R	304	0	319	0	319	0	319	20	<55	<45	<45	lessthan55	lessthan45			-7558	130		0	319			None	None			2012-11-23	FEMALE	NO				Thyroid Papillary Carcinoma	Follicular (>= 99% follicular patterned)		No				Patient did not receive I-131 treatment	C73	8340/3	C73.9	YES	70
TCGA-EM-A2CU-01	TCGA-EM-A2CU-01	NA	NA	NA	305	0	400	0	400	0	400	47	<55	45~54	>=45	lessthan55	over45			-17231	72		0	400			None	None			2012-11-23	FEMALE	NO				Thyroid Papillary Carcinoma	Follicular (>= 99% follicular patterned)		No	30 mci		30 mci	rhTSH	C73	8340/3	C73.9	YES	120
TCGA-EM-A2OV-01	TCGA-EM-A2OV-01	NA	NA	NA	306	0	674	0	674	0	674	64	>=55	>=55	>=45	over55	over45			-23656	205		0	674			None	None			2013-03-20	FEMALE	NO				Thyroid Papillary Carcinoma	Follicular (>= 99% follicular patterned)		No	70 mCI	No	70 mCI	Thyroxine withdrawal	C73	8340/3	C73.9	YES	150
TCGA-EM-A2OW-01	TCGA-EM-A2OW-01	NA	NA	NA	307	0	421	0	421	0	421	37	<55	<45	<45	lessthan55	lessthan45			-13761	142		0	421			None	None			2013-03-20	FEMALE	NO				Thyroid Papillary Carcinoma	Follicular (>= 99% follicular patterned)		No				Patient did not receive I-131 treatment	C73	8340/3	C73.9	YES	50
TCGA-EM-A2OX-01	TCGA-EM-A2OX-01	V600E	NA	NA	308	0	600	0	600	0	600	46	<55	45~54	>=45	lessthan55	over45			-16911			0	600			None	None	Parent		2013-03-20	MALE	NO				Thyroid Papillary Carcinoma	Classical/usual		No	75 mCI	none	75 mCI	rhTSH	C73	8260/3	C73.9	YES
TCGA-EM-A2OY-01	TCGA-EM-A2OY-01	NA	NA	NA	309	0	535	0	535	0	535	46	<55	45~54	>=45	lessthan55	over45			-17075	150		0	535			None	None			2013-03-20	FEMALE	NO				Thyroid Papillary Carcinoma	Follicular (>= 99% follicular patterned)		No	75 mCI	none	75 mCI	rhTSH	C73	8340/3	C73.9	YES	90
TCGA-EM-A2OZ-01	TCGA-EM-A2OZ-01	V600E	NA	NA	310	0	367	0	367	0	367	66	>=55	>=55	>=45	over55	over45			-24195	129		0	367			None	None			2013-03-20	MALE	NO				Thyroid Papillary Carcinoma	Classical/usual		No				Patient did not receive I-131 treatment	C73	8260/3	C73.9	YES	70
TCGA-EM-A2P0-01	TCGA-EM-A2P0-01	V600E	NA	NA	311	0	535	0	535	0	535	33	<55	<45	<45	lessthan55	lessthan45			-12127	108		0	535			None	None	Parent		2013-03-20	MALE	NO				Thyroid Papillary Carcinoma	Classical/usual		No	100 mCI	none	100 mCI	Thyroxine withdrawal	C73	8260/3	C73.9	YES	80
TCGA-EM-A2P1-01	TCGA-EM-A2P1-01	V600E	NA	NA	312	0	531	0	363	1	531	33	<55	<45	<45	lessthan55	lessthan45			-12320	84		0	531		363	None	None			2013-03-20	MALE	NO				Thyroid Papillary Carcinoma	Classical/usual		No	100 mCI	none	100 mCI	Thyroxine withdrawal	C73	8260/3	C73.9	YES	90
TCGA-EM-A2P2-01	TCGA-EM-A2P2-01	T488_P492del	NA	NA	313	0	526	0	526	0	526	46	<55	45~54	>=45	lessthan55	over45			-16895	78		0	526			None	None			2013-03-20	MALE	NO				Thyroid Papillary Carcinoma	Follicular (>= 99% follicular patterned)		No	100 mCI	none	100 mCI	Thyroxine withdrawal	C73	8340/3	C73.9	YES	80
TCGA-EM-A2P3-01	TCGA-EM-A2P3-01	V600E	NA	NA	314	0	444	0	444	0	444	47	<55	45~54	>=45	lessthan55	over45			-17495			0	444			None	None			2013-03-20	FEMALE	NO				Thyroid Papillary Carcinoma	Classical/usual		No				Patient did not receive I-131 treatment	C73	8260/3	C73.9	YES
TCGA-EM-A3AI-01	TCGA-EM-A3AI-01	NA	NA	NA	315	0	685	0	685	0	685	67	>=55	>=55	>=45	over55	over45			-24820	294		0	685			None	None			2012-12-28	FEMALE	NO				Thyroid Papillary Carcinoma	Follicular (>= 99% follicular patterned)		No	75 mci		75 mci	Thyroxine withdrawal	C73	8340/3	C73.9	YES	100
TCGA-EM-A3AJ-01	TCGA-EM-A3AJ-01	NA	NA	NA	316	0	577	0	577	0	577	39	<55	<45	<45	lessthan55	lessthan45			-14399	209		0	577			None	None			2012-12-28	MALE	NO				Thyroid Papillary Carcinoma	Follicular (>= 99% follicular patterned)		No	75 mci		75 mci	rhTSH	C73	8340/3	C73.9	YES	130
TCGA-EM-A3AK-01	TCGA-EM-A3AK-01	V600E	NA	NA	317	0	477	0	477	0	477	62	>=55	>=55	>=45	over55	over45			-22911	170		0	477			None	None			2013-01-07	FEMALE	NO				Thyroid Papillary Carcinoma	Classical/usual		No				Patient did not receive I-131 treatment	C73	8260/3	C73.9	YES	80
TCGA-EM-A3AL-01	TCGA-EM-A3AL-01	NA	NA	NA	318	0	430	0	430	0	430	45	<55	45~54	>=45	lessthan55	over45			-16439	174		0	430			None	None			2013-01-07	FEMALE	NO				Thyroid Papillary Carcinoma	Follicular (>= 99% follicular patterned)		No				Patient did not receive I-131 treatment	C73	8340/3	C73.9	YES	140
TCGA-EM-A3AN-01	TCGA-EM-A3AN-01	NA	NA	NA	319	0	597	0	597	0	597	36	<55	<45	<45	lessthan55	lessthan45			-13188	162		0	597			None	None			2013-01-07	FEMALE	NO				Thyroid Papillary Carcinoma	Classical/usual		No	125 mci		125 mci	Thyroxine withdrawal	C73	8260/3	C73.9	YES	120
TCGA-EM-A3AO-01	TCGA-EM-A3AO-01	NA	NA	NA	320	0	407	0	407	0	407	61	>=55	>=55	>=45	over55	over45			-22347	136		0	407			None	None			2013-01-07	MALE	NO				Thyroid Papillary Carcinoma	Classical/usual		No	125 mci		125 mci	Thyroxine withdrawal	C73	8260/3	C73.9	YES	110
TCGA-EM-A3AP-01	TCGA-EM-A3AP-01	NA	NA	Q61K	321	0	254	0	254	0	254	31	<55	<45	<45	lessthan55	lessthan45			-11592	142		0	254			None	None			2013-01-07	FEMALE	NO				Thyroid Papillary Carcinoma	Follicular (>= 99% follicular patterned)		No				Patient did not receive I-131 treatment	C73	8340/3	C73.9	YES	120
TCGA-EM-A3AQ-01	TCGA-EM-A3AQ-01	NA	NA	NA	322	0	500	0	500	0	500	85	>=55	>=55	>=45	over55	over45			-31198	128		0	500			None	None			2013-01-07	FEMALE	NO				Thyroid Papillary Carcinoma	Classical/usual		No				Patient did not receive I-131 treatment	C73	8260/3	C73.9	YES	50
TCGA-EM-A3AR-01	TCGA-EM-A3AR-01	V600E	NA	NA	323	0	510	0	510	0	510	41	<55	<45	<45	lessthan55	lessthan45			-15313	103		0	510			None	None			2013-01-07	MALE	NO				Thyroid Papillary Carcinoma	Classical/usual		No	100 mci		100 mci	Thyroxine withdrawal	C73	8260/3	C73.9	YES	50
TCGA-EM-A3FJ-01	TCGA-EM-A3FJ-01	V600E	NA	NA	324	0	850	0	850	0	850	24	<55	<45	<45	lessthan55	lessthan45			-9042	500		0	850			None	None			2013-03-22	FEMALE	NO				Thyroid Papillary Carcinoma	Classical/usual		No	100 mci		100 mci	rhTSH	C73	8260/3	C73.9	YES	90
TCGA-EM-A3FK-01	TCGA-EM-A3FK-01	V600E	NA	NA	325	0	723	0	723	0	723	30	<55	<45	<45	lessthan55	lessthan45			-10992	436		0	723			None	None			2013-01-08	FEMALE	NO				Thyroid Papillary Carcinoma	Classical/usual		No	125 mci		125 mci	rhTSH	C73	8260/3	C73.9	YES	60
TCGA-EM-A3FL-01	TCGA-EM-A3FL-01	NA	NA	NA	326	0	511	0	511	0	511	63	>=55	>=55	>=45	over55	over45			-23183	280		0	511			None	None			2013-01-08	FEMALE	NO				Thyroid Papillary Carcinoma	Follicular (>= 99% follicular patterned)		No	75 mci		75 mci	Thyroxine withdrawal	C73	8340/3	C73.9	YES	90
TCGA-EM-A3FM-01	TCGA-EM-A3FM-01	V600E	NA	NA	327	0	639	0	514	1	639	57	>=55	>=55	>=45	over55	over45			-20938	248		0	639		514	None	None			2013-01-08	MALE	NO				Thyroid Papillary Carcinoma	Classical/usual		No	100 mci		100 mci	Patient did not receive I-131 treatment	C73	8260/3	C73.9	YES	80
TCGA-EM-A3FN-01	TCGA-EM-A3FN-01	NA	NA	NA	328	0	367	0	367	0	367	42	<55	<45	<45	lessthan55	lessthan45			-15655	234		0	367			None	None			2013-01-08	FEMALE	NO				Thyroid Papillary Carcinoma	Follicular (>= 99% follicular patterned)		No				Patient did not receive I-131 treatment	C73	8340/3	C73.9	YES	90
TCGA-EM-A3FO-01	TCGA-EM-A3FO-01	V600E	NA	NA	329	0	532	0	532	0	532	40	<55	<45	<45	lessthan55	lessthan45			-14864	148		0	532			None	None			2013-01-08	MALE	NO				Thyroid Papillary Carcinoma	Classical/usual		No	100 mci		100 mci	Thyroxine withdrawal	C73	8260/3	C73.9	YES	100
TCGA-EM-A3FP-01	TCGA-EM-A3FP-01	NA	NA	NA	330	0	529	0	529	0	529	71	>=55	>=55	>=45	over55	over45			-26158	137		0	529			None	None			2013-01-08	FEMALE	NO				Thyroid Papillary Carcinoma	Follicular (>= 99% follicular patterned)		No	75 mci		75 mci	rhTSH	C73	8340/3	C73.9	YES	110
TCGA-EM-A3FQ-01	TCGA-EM-A3FQ-01	NA	NA	NA	331	0	492	0	492	0	492	19	<55	<45	<45	lessthan55	lessthan45			-7176	101		0	492			None	None			2013-01-09	FEMALE	NO				Other specify		cribriform morular	No	125 mci		125 mci	Thyroxine withdrawal	C73	8260/3	C73.9	YES	80
TCGA-EM-A3FR-01	TCGA-EM-A3FR-01	NA	NA	NA	332	0	457	0	457	0	457	55	>=55	>=55	>=45	over55	over45			-20349	95		0	457			None	None			2013-01-09	FEMALE	NO				Thyroid Papillary Carcinoma	Classical/usual		No	75 mci		75 mci	Thyroxine withdrawal	C73	8260/3	C73.9	YES	80
TCGA-EM-A3O3-01	TCGA-EM-A3O3-01	V600E	NA	NA	333	0	441	0	441	0	441	83	>=55	>=55	>=45	over55	over45			-30500	127		0	441			None	None			2013-03-12	FEMALE	NO				Thyroid Papillary Carcinoma	Classical/usual		No	100		100	rhTSH	C73	8260/3	C73.9	YES	120
TCGA-EM-A3O6-01	TCGA-EM-A3O6-01	NA	NA	NA	334	0	458	0	458	0	458	54	<55	45~54	>=45	lessthan55	over45			-19856	123		0	458			None	None			2013-03-12	FEMALE	NO				Thyroid Papillary Carcinoma	Follicular (>= 99% follicular patterned)		No	75		75	Thyroxine withdrawal	C73	8340/3	C73.9	YES	90
TCGA-EM-A3O7-01	TCGA-EM-A3O7-01	V600E	NA	NA	335	0	223	0	223	0	223	46	<55	45~54	>=45	lessthan55	over45			-16842	112		0	223			None	None			2013-03-12	FEMALE	NO				Thyroid Papillary Carcinoma	Classical/usual		No	100		100	Thyroxine withdrawal	C73	8260/3	C73.9	YES	80
TCGA-EM-A3O8-01	TCGA-EM-A3O8-01	K601E	NA	NA	336	0	381	0	381	0	381	33	<55	<45	<45	lessthan55	lessthan45			-12405	100		0	381			None	None			2013-03-12	FEMALE	NO				Thyroid Papillary Carcinoma	Follicular (>= 99% follicular patterned)		No				Patient did not receive I-131 treatment	C73	8340/3	C73.9	YES	80
TCGA-EM-A3O9-01	TCGA-EM-A3O9-01	NA	NA	NA	337	0	281	0	281	0	281	40	<55	<45	<45	lessthan55	lessthan45			-14783	99		0	281			None	None			2013-03-13	MALE	NO				Thyroid Papillary Carcinoma	Follicular (>= 99% follicular patterned)		No	100 MCI		100 MCI	Thyroxine withdrawal	C73	8342/3	C73.9	YES	80
TCGA-EM-A3OA-01	TCGA-EM-A3OA-01	NA	NA	Q61K	338	0	423	0	423	0	423	55	>=55	>=55	>=45	over55	over45			-20284	101		0	423			None	None			2013-03-13	FEMALE	NO				Thyroid Papillary Carcinoma	Follicular (>= 99% follicular patterned)		No				Patient did not receive I-131 treatment	C73	8340/3	C73.9	YES	80
TCGA-EM-A3OB-01	TCGA-EM-A3OB-01	NA	NA	Q61R	339	0	238	0	238	0	238	33	<55	<45	<45	lessthan55	lessthan45			-12282	79		0	238			None	None			2013-03-13	FEMALE	NO				Thyroid Papillary Carcinoma	Follicular (>= 99% follicular patterned)		No				Patient did not receive I-131 treatment	C73	8340/3	C73.9	YES	80
TCGA-EM-A3ST-01	TCGA-EM-A3ST-01	NA	NA	NA	340	0	350	0	350	0	350	62	>=55	>=55	>=45	over55	over45			-22990	224		0	350			None	None			2013-03-20	FEMALE	NO				Thyroid Papillary Carcinoma	Follicular (>= 99% follicular patterned)		No	150 MCi		150 MCI	Thyroxine withdrawal	C73	8340/3	C73.9	YES	100
TCGA-EM-A3SU-01	TCGA-EM-A3SU-01	NA	NA	NA	341	0	499	0	499	0	499	43	<55	<45	<45	lessthan55	lessthan45			-15768	204		0	499			None	None	Parent		2013-03-20	FEMALE	NO				Thyroid Papillary Carcinoma	Classical/usual		No	125 MCi		125 MCI	rhTSH	C73	8260/3	C73.9	YES	110
TCGA-EM-A3SX-01	TCGA-EM-A3SX-01	NA	NA	NA	342	0	475	0	475	0	475	28	<55	<45	<45	lessthan55	lessthan45			-10447	183		0	475			None	None			2013-03-20	FEMALE	NO				Thyroid Papillary Carcinoma	Classical/usual		No	29.9 MCI		29.9 MCi	Patient did not receive I-131 treatment	C73	8260/3	C73.9	YES	130
TCGA-EM-A3SY-01	TCGA-EM-A3SY-01	NA	NA	NA	343	0	411	0	411	0	411	36	<55	<45	<45	lessthan55	lessthan45			-13461	148		0	411			None	None			2013-03-20	MALE	NO				Thyroid Papillary Carcinoma	Follicular (>= 99% follicular patterned)		No				Patient did not receive I-131 treatment	C73	8342/3	C73.9	YES	100
TCGA-EM-A3SZ-01	TCGA-EM-A3SZ-01	NA	NA	NA	344	0	389	0	389	0	389	42	<55	<45	<45	lessthan55	lessthan45			-15659	129		0	389			None	None			2013-03-20	FEMALE	NO				Thyroid Papillary Carcinoma	Classical/usual		No				Patient did not receive I-131 treatment	C73	8260/3	C73.9	YES	120
TCGA-EM-A4FF-01	TCGA-EM-A4FF-01	NA	NA	NA	345	0	2573	0	1785	1	2573	40	<55	<45	<45	lessthan55	lessthan45			-14796	2135		0	2573	1855	1785	None	None			2014-09-17	FEMALE	NO		NO		Thyroid Papillary Carcinoma	Classical/usual		No	125		125	rhTSH	C73	8260/3	C73.9	YES	50
TCGA-EM-A4FH-01	TCGA-EM-A4FH-01	NA	NA	NA	346	0	892	0	892	0	892	69	>=55	>=55	>=45	over55	over45			-25500	353		0	892			None	None			2014-09-16	MALE	NO				Thyroid Papillary Carcinoma	Follicular (>= 99% follicular patterned)		No	100mcI		100mcI	Thyroxine withdrawal	C73	8340/3	C73.9	YES	90
TCGA-EM-A4FK-01	TCGA-EM-A4FK-01	NA	NA	Q61R	347	0	649	0	649	0	649	33	<55	<45	<45	lessthan55	lessthan45			-12383	281		0	649			None	None			2014-08-29	FEMALE	NO				Thyroid Papillary Carcinoma	Follicular (>= 99% follicular patterned)		No				Patient did not receive I-131 treatment	C73	8340/3	C73.9	YES	70
TCGA-EM-A4FM-01	TCGA-EM-A4FM-01	V600E	NA	NA	348	0	162	0	162	0	162	59	>=55	>=55	>=45	over55	over45			-21595			0	162			Minimal (T3)	Microscopic			2014-08-28	FEMALE	NO				Thyroid Papillary Carcinoma	Classical/usual		No	150		150	Thyroxine withdrawal	C73	8260/3	C73.9	YES
TCGA-EM-A4FN-01	TCGA-EM-A4FN-01	NA	NA	NA	349	0	802	0	802	0	802	49	<55	45~54	>=45	lessthan55	over45			-18185			0	802			None	None			2014-09-18	FEMALE	NO				Thyroid Papillary Carcinoma	Classical/usual		No	100mcI		100mcI	Thyroxine withdrawal	C73	8260/3	C73.9	YES
TCGA-EM-A4FO-01	TCGA-EM-A4FO-01	V600E	NA	NA	350	0	802	0	802	0	802	72	>=55	>=55	>=45	over55	over45			-26589	234		0	802			None	None			2014-08-29	MALE	NO				Thyroid Papillary Carcinoma	Classical/usual		No	100mCi		100mCi	rhTSH	C73	8260/3	C73.9	YES	60
TCGA-EM-A4FQ-01	TCGA-EM-A4FQ-01	V600E	NA	NA	351	0	683	0	683	0	683	42	<55	<45	<45	lessthan55	lessthan45			-15534	178		0	683			None	None			2014-08-28	FEMALE	NO				Thyroid Papillary Carcinoma	Follicular (>= 99% follicular patterned)		No	125		125	rhTSH	C73	8340/3	C73.9	YES	70
TCGA-EM-A4FR-01	TCGA-EM-A4FR-01	NA	NA	NA	352	0	655	0	655	0	655	28	<55	<45	<45	lessthan55	lessthan45			-10316	52		0	655			None	None			2014-09-18	MALE	NO				Other specify		cribiform morular	No	100mcI		100mcI	rhTSH	C73	8260/3	C73.9	YES	60
TCGA-EM-A4FU-01	TCGA-EM-A4FU-01	NA	NA	NA	353	0	1840	0	781	1	1840	35	<55	<45	<45	lessthan55	lessthan45			-12912	1120		0	1840	895	781	None	None			2014-09-18	MALE	NO		NO		Thyroid Papillary Carcinoma	Follicular (>= 99% follicular patterned)		No	75mcI		75mcI	rhTSH	C73	8340/3	C73.9	YES	70
TCGA-EM-A4FV-01	TCGA-EM-A4FV-01	V600E	NA	NA	354	0	744	0	744	0	744	64	>=55	>=55	>=45	over55	over45			-23627	337		0	744			None	None			2014-09-17	FEMALE	NO				Thyroid Papillary Carcinoma	Classical/usual		No				Patient did not receive I-131 treatment	C73	8260/3	C73.9	YES	60
TCGA-EM-A4G1-01	TCGA-EM-A4G1-01	NA	NA	Q61R	355	0	416	0	416	0	416	26	<55	<45	<45	lessthan55	lessthan45			-9844	30		0	416			None	None			2014-09-16	FEMALE	NO				Thyroid Papillary Carcinoma	Classical/usual		No				Patient did not receive I-131 treatment	C73	8340/3	C73.9	YES	120
TCGA-ET-A25G-01	TCGA-ET-A25G-01	V600E	NA	NA	356	0	1444	0	1444	0	1444	56	>=55	>=55	>=45	over55	over45			-20816	1071		0	1444			Minimal (T3)	Microscopic			2012-09-06	FEMALE	NO				Thyroid Papillary Carcinoma	Tall Cell (>= 50% tall cell features)		No				Thyroxine withdrawal	C73	8344/3	C73.9	YES	120
TCGA-ET-A25I-01	TCGA-ET-A25I-01	NA	NA	Q61K	357	0	1466	0	1466	0	1466	37	<55	<45	<45	lessthan55	lessthan45			-13786	1064		0	1466			None	None			2012-09-06	FEMALE	NO				Thyroid Papillary Carcinoma	Follicular (>= 99% follicular patterned)		No					C73	8340/3	C73.9	YES	30
TCGA-ET-A25J-01	TCGA-ET-A25J-01	V600E	NA	NA	358	0	903	0			903	40	<55	<45	<45	lessthan55	lessthan45			-14843	952		0	903			None	None			2011-08-19	FEMALE	NO				Thyroid Papillary Carcinoma	Classical/usual		No					C73	8260/3	C73.9	YES	60
TCGA-ET-A25K-01	TCGA-ET-A25K-01	V600E	NA	NA	359	0	984	0	984	0	984	36	<55	<45	<45	lessthan55	lessthan45			-13351	720		0	984			None	None			2012-09-06	FEMALE	NO				Thyroid Papillary Carcinoma	Classical/usual		No					C73	8260/3	C73.9	YES	40
TCGA-ET-A25L-01	TCGA-ET-A25L-01	NA	NA	NA	360	0	450	0			450	52	<55	45~54	>=45	lessthan55	over45			-19159	399		0	450			Minimal (T3)	Microscopic			2011-08-19	FEMALE	NO				Thyroid Papillary Carcinoma	Tall Cell (>= 50% tall cell features)		No					C73	8344/3	C73.9	YES	170
TCGA-ET-A25M-01	TCGA-ET-A25M-01	NA	NA	NA	361	0	375	0			375	33	<55	<45	<45	lessthan55	lessthan45			-12085	424		0	375			None	None			2011-08-19	MALE	NO				Thyroid Papillary Carcinoma	Classical/usual		No					C73	8260/3	C73.9	YES	180
TCGA-ET-A25N-01	TCGA-ET-A25N-01	NA	NA	NA	362	0	450	0	450	0	450	28	<55	<45	<45	lessthan55	lessthan45			-10229	521		0	450			None	None			2012-09-06	FEMALE	NO				Thyroid Papillary Carcinoma	Classical/usual		No					C73	8260/3	C73.9	YES	60
TCGA-ET-A25O-01	TCGA-ET-A25O-01	V600E	NA	NA	363	0	824	0	824	0	824	35	<55	<45	<45	lessthan55	lessthan45			-12924	560		0	824			None	None			2012-09-06	FEMALE	NO				Thyroid Papillary Carcinoma	Classical/usual		No					C73	8260/3	C73.9	YES	90
TCGA-ET-A25P-01	TCGA-ET-A25P-01	NA	NA	NA	364	0	559	0	559	0	559	24	<55	<45	<45	lessthan55	lessthan45			-8787	523		0	559			None	None			2012-09-06	FEMALE	NO				Thyroid Papillary Carcinoma	Classical/usual		No					C73	8260/3	C73.9	YES	50
TCGA-ET-A25R-01	TCGA-ET-A25R-01	V600E	NA	NA	365	0	897	0	897	0	897	51	<55	45~54	>=45	lessthan55	over45			-18863			0	897			Minimal (T3)	Microscopic			2012-09-06	FEMALE	NO				Thyroid Papillary Carcinoma	Tall Cell (>= 50% tall cell features)		No				Patient did not receive I-131 treatment	C73	8344/3	C73.9	YES
TCGA-ET-A2MX-01	TCGA-ET-A2MX-01	Fusion	NA	NA	366	0	1644	0	1644	0	1644	27	<55	<45	<45	lessthan55	lessthan45			-10044	1359		0	1644			None	None			2012-10-22	MALE	NO				Thyroid Papillary Carcinoma	Classical/usual		No					C73	8260/3	C73.9	YES	220
TCGA-ET-A2MY-01	TCGA-ET-A2MY-01	V600E	NA	NA	367	0	672	0	672	0	672	72	>=55	>=55	>=45	over55	over45			-26406	469		0	672			None	None			2012-10-23	FEMALE	NO				Thyroid Papillary Carcinoma	Classical/usual		No					C73	8260/3	C73.9	YES	130
TCGA-ET-A2MZ-01	TCGA-ET-A2MZ-01	V600E	NA	NA	368	0	373	0	373	0	373	39	<55	<45	<45	lessthan55	lessthan45			-14408	280		0	373			None	None			2012-10-23	MALE	NO				Thyroid Papillary Carcinoma	Classical/usual		No				Patient did not receive I-131 treatment	C73	8260/3	C73.9	YES	100
TCGA-ET-A2N0-01	TCGA-ET-A2N0-01	V600E	NA	NA	369	0	489	0	489	0	489	51	<55	45~54	>=45	lessthan55	over45			-18692	286		0	489			None	None			2012-10-23	FEMALE	NO				Thyroid Papillary Carcinoma	Classical/usual		No					C73	8260/3	C73.9	YES	110
TCGA-ET-A2N3-01	TCGA-ET-A2N3-01	NA	NA	NA	370	0	601	0	601	0	601	34	<55	<45	<45	lessthan55	lessthan45			-12603	1556		0	601			None	None			2012-10-23	FEMALE	NO				Thyroid Papillary Carcinoma	Follicular (>= 99% follicular patterned)		No					C73	8340/3	C73.9	YES	190
TCGA-ET-A2N4-01	TCGA-ET-A2N4-01	V600E	NA	NA	371	0	81	0	81	0	81	53	<55	45~54	>=45	lessthan55	over45			-19671	1218		0	81			Minimal (T3)	Microscopic			2012-10-23	FEMALE	NO				Thyroid Papillary Carcinoma	Follicular (>= 99% follicular patterned)		No					C73	8340/3	C73.9	YES	220
TCGA-ET-A2N5-01	TCGA-ET-A2N5-01	NA	Q61R	NA	372	0	1393	0	1393	0	1393	46	<55	45~54	>=45	lessthan55	over45			-17137	1190		0	1393			Minimal (T3)	Microscopic	Parent|Child		2012-10-23	FEMALE	NO				Thyroid Papillary Carcinoma	Follicular (>= 99% follicular patterned)		No				Thyroxine withdrawal	C73	8340/3	C73.9	YES	360
TCGA-ET-A39I-01	TCGA-ET-A39I-01	NA	Q61R	NA	373	0	418	0			418	83	>=55	>=55	>=45	over55	over45			-30349	1442		0	418			None	None			2012-11-12	FEMALE	NO				Thyroid Papillary Carcinoma	Follicular (>= 99% follicular patterned)		No					C73	8340/3	C73.9	YES	80
TCGA-ET-A39J-01	TCGA-ET-A39J-01	V600E	NA	NA	374	0	2160	0	2160	0	2160	23	<55	<45	<45	lessthan55	lessthan45			-8491	1946		0	2160			None	None			2012-11-12	FEMALE	NO				Thyroid Papillary Carcinoma	Classical/usual		No	100 mCi		100 mCi	Thyroxine withdrawal	C73	8260/3	C73.9	YES	70
TCGA-ET-A39K-01	TCGA-ET-A39K-01	V600E	NA	NA	375	0	2205	0	2205	0	2205	48	<55	45~54	>=45	lessthan55	over45			-17789	1989		0	2205	799	745	Minimal (T3)	Microscopic			2012-11-12	FEMALE	NO		NO		Thyroid Papillary Carcinoma	Classical/usual		No	77.6 mCi		77.6 mCi	Thyroxine withdrawal	C73	8260/3	C73.9	YES	80
TCGA-ET-A39L-01	TCGA-ET-A39L-01	NA	NA	NA	376	0	1988	0	1988	0	1988	20	<55	<45	<45	lessthan55	lessthan45			-7636	2018		0	1988			None	None			2012-11-12	FEMALE	NO				Thyroid Papillary Carcinoma	Classical/usual		No					C73	8260/3	C73.9	YES	100
TCGA-ET-A39M-01	TCGA-ET-A39M-01	V600E	NA	NA	377	0	2582	0	2582	0	2582	34	<55	<45	<45	lessthan55	lessthan45			-12441	2520		0	2582			None	None			2012-11-07	MALE	NO				Thyroid Papillary Carcinoma	Classical/usual		No					C73	8260/3	C73.9	YES	90
TCGA-ET-A39N-01	TCGA-ET-A39N-01	NA	NA	NA	378	0	2535	0	2535	0	2535	35	<55	<45	<45	lessthan55	lessthan45			-12904	2478		0	2535			None	None	Sibling		2012-11-07	FEMALE	NO				Thyroid Papillary Carcinoma	Classical/usual		No					C73	8260/3	C73.9	YES	100
TCGA-ET-A39O-01	TCGA-ET-A39O-01	V600E	NA	NA	379	0	1856	0	1856	0	1856	39	<55	<45	<45	lessthan55	lessthan45			-14295	1778		0	1856			None	None			2012-11-12	MALE	NO				Thyroid Papillary Carcinoma	Tall Cell (>= 50% tall cell features)		No					C73	8344/3	C73.9	YES	80
TCGA-ET-A39P-01	TCGA-ET-A39P-01	V600E	NA	NA	380	0	1786	0	1786	0	1786	73	>=55	>=55	>=45	over55	over45			-26817	1617		0	1786			Minimal (T3)	Microscopic			2012-11-12	FEMALE	NO				Thyroid Papillary Carcinoma	Classical/usual		No	75 mCi		75mCi	Thyroxine withdrawal	C73	8260/3	C73.9	YES	490
TCGA-ET-A39R-01	TCGA-ET-A39R-01	NA	NA	NA	381	0	1737	0	1737	0	1737	24	<55	<45	<45	lessthan55	lessthan45			-8828	1583		0	1737			None	None			2012-11-12	FEMALE	NO				Thyroid Papillary Carcinoma	Classical/usual		No				Patient did not receive I-131 treatment	C73	8260/3	C73.9	YES	170
TCGA-ET-A39S-01	TCGA-ET-A39S-01	V600E	NA	NA	382	0	1676	0	1676	0	1676	27	<55	<45	<45	lessthan55	lessthan45			-10000	1507		0	1676			None	None			2012-11-12	FEMALE	NO				Thyroid Papillary Carcinoma	Classical/usual		No					C73	8260/3	C73.9	YES	50
TCGA-ET-A39T-01	TCGA-ET-A39T-01	V600E	NA	NA	383	0	1799	0	1799	0	1799	55	>=55	>=55	>=45	over55	over45			-20164	1721		0	1799			Minimal (T3)	Microscopic			2012-11-12	FEMALE	NO				Thyroid Papillary Carcinoma	Follicular (>= 99% follicular patterned)		No					C73	8340/3	C73.9	YES	430
TCGA-ET-A3BN-01	TCGA-ET-A3BN-01	Fusion	NA	NA	384	0	859	0	859	0	859	33	<55	<45	<45	lessthan55	lessthan45			-12122	918		0	859			None	None			2012-11-19	FEMALE	NO				Thyroid Papillary Carcinoma	Classical/usual		No					C73	8260/3	C73.9	YES	150
TCGA-ET-A3BO-01	TCGA-ET-A3BO-01	V600E	NA	NA	385	0	178	0			178	44	<55	<45	<45	lessthan55	lessthan45			-16110	283		0	178			Minimal (T3)	Microscopic			2012-01-09	FEMALE	NO				Thyroid Papillary Carcinoma	Tall Cell (>= 50% tall cell features)		No					C73	8344/3	C73.9	YES	80
TCGA-ET-A3BP-01	TCGA-ET-A3BP-01	V600E	NA	NA	386	0	127	0			127	34	<55	<45	<45	lessthan55	lessthan45			-12594	1149		0	127			None	None			2012-01-06	FEMALE	NO				Thyroid Papillary Carcinoma	Classical/usual		No					C73	8260/3	C73.9	YES	110
TCGA-ET-A3BQ-01	TCGA-ET-A3BQ-01	V600E	NA	NA	387	0	74	0			74	27	<55	<45	<45	lessthan55	lessthan45			-10034			0	74			None	None			2012-01-10	FEMALE	NO				Thyroid Papillary Carcinoma	Classical/usual		No					C73	8260/3	C73.9	YES
TCGA-ET-A3BS-01	TCGA-ET-A3BS-01	V600E	NA	NA	388	0	169	0			169	42	<55	<45	<45	lessthan55	lessthan45			-15421	316		0	169			Minimal (T3)	Microscopic			2012-01-09	MALE	NO				Thyroid Papillary Carcinoma	Classical/usual		No					C73	8260/3	C73.9	YES	260
TCGA-ET-A3BT-01	TCGA-ET-A3BT-01	V600E	NA	NA	389	0	752	0			752	60	>=55	>=55	>=45	over55	over45			-22108	1396		0	752			None	None			2012-01-10	FEMALE	NO				Thyroid Papillary Carcinoma	Tall Cell (>= 50% tall cell features)		No					C73	8344/3	C73.9	YES	90
TCGA-ET-A3BU-01	TCGA-ET-A3BU-01	V600E	NA	NA	390	0	1165	0	1165	0	1165	28	<55	<45	<45	lessthan55	lessthan45			-10510	1102		0	1165			None	None			2012-11-20	MALE	NO				Thyroid Papillary Carcinoma	Classical/usual		No					C73	8260/3	C73.9	YES	80
TCGA-ET-A3BV-01	TCGA-ET-A3BV-01	V600E	NA	NA	391	0	1285	0	1204	1	1285	47	<55	45~54	>=45	lessthan55	over45			-17441	1028		0	1285	1279	1204	None	None			2012-11-20	FEMALE	NO				Thyroid Papillary Carcinoma	Classical/usual		No					C73	8260/3	C73.9	YES	120
TCGA-ET-A3BW-01	TCGA-ET-A3BW-01	V600E	NA	NA	392	0	72	0			72	30	<55	<45	<45	lessthan55	lessthan45			-11032	155		0	72			None	None			2012-01-05	FEMALE	NO				Thyroid Papillary Carcinoma	Classical/usual		No					C73	8260/3	C73.9	YES	210
TCGA-ET-A3BX-01	TCGA-ET-A3BX-01	V600E	NA	NA	393	0	137	0			137	24	<55	<45	<45	lessthan55	lessthan45			-8791	328		0	137			Minimal (T3)	Microscopic			2012-01-05	MALE	NO				Thyroid Papillary Carcinoma	Classical/usual		No					C73	8260/3	C73.9	YES	410
TCGA-ET-A3DO-01	TCGA-ET-A3DO-01	V600E	NA	NA	394	0	2458	0	570	1	2458	33	<55	<45	<45	lessthan55	lessthan45			-12158	2339		0	2458	660	570	None	None			2012-11-26	FEMALE	NO				Thyroid Papillary Carcinoma	Classical/usual		No					C73	8260/3	C73.9	YES	130
TCGA-ET-A3DP-01	TCGA-ET-A3DP-01	V600E	NA	NA	395	0	1730	0	1730	0	1730	43	<55	<45	<45	lessthan55	lessthan45			-15876	1632		0	1730			None	None			2012-11-26	FEMALE	NO				Thyroid Papillary Carcinoma	Classical/usual		No				Patient did not receive I-131 treatment	C73	8260/3	C73.9	YES	170
TCGA-ET-A3DQ-01	TCGA-ET-A3DQ-01	NA	NA	NA	396	0	1367	0	1367	0	1367	43	<55	<45	<45	lessthan55	lessthan45			-15871	1351		0	1367			None	None			2012-11-26	FEMALE	NO				Thyroid Papillary Carcinoma	Follicular (>= 99% follicular patterned)		No				Patient did not receive I-131 treatment	C73	8340/3	C73.9	YES	60
TCGA-ET-A3DR-01	TCGA-ET-A3DR-01	NA	NA	NA	397	0	1323	0			1323	42	<55	<45	<45	lessthan55	lessthan45			-15404	1218		0	1323			None	None			2012-11-26	FEMALE	NO				Thyroid Papillary Carcinoma	Classical/usual		No				Patient did not receive I-131 treatment	C73	8260/3	C73.9	YES	30
TCGA-ET-A3DS-01	TCGA-ET-A3DS-01	NA	NA	NA	398	0	9	0	9	0	9	33	<55	<45	<45	lessthan55	lessthan45			-12252	784		0	9			None	None			2013-03-14	FEMALE	NO				Thyroid Papillary Carcinoma	Classical/usual		No				Patient did not receive I-131 treatment	C73	8260/3	C73.9	YES	130
TCGA-ET-A3DT-01	TCGA-ET-A3DT-01	V600E	NA	NA	399	0	371	0	371	0	371	23	<55	<45	<45	lessthan55	lessthan45			-8761	84		0	371			None	None			2012-12-14	FEMALE	NO				Thyroid Papillary Carcinoma	Classical/usual		No					C73	8260/3	C73.9	YES	100
TCGA-ET-A3DU-01	TCGA-ET-A3DU-01	V600E	NA	NA	400	0	770	0	770	0	770	21	<55	<45	<45	lessthan55	lessthan45			-7869	665		0	770			None	None			2012-12-14	FEMALE	NO				Thyroid Papillary Carcinoma	Classical/usual		No	73.2		73.2	rhTSH	C73	8260/3	C73.9	YES	80
TCGA-ET-A3DV-01	TCGA-ET-A3DV-01	NA	NA	NA	401	0	4026	0	4026	0	4026	68	>=55	>=55	>=45	over55	over45			-24905	3815		0	4026			Minimal (T3)	Microscopic			2012-11-07	FEMALE	NO				Thyroid Papillary Carcinoma	Follicular (>= 99% follicular patterned)		No					C73	8340/3	C73.9	YES	100
TCGA-ET-A3DW-01	TCGA-ET-A3DW-01	V600E	NA	NA	402	0	752	0	752	0	752	64	>=55	>=55	>=45	over55	over45			-23603	3138		0	752			None	None			2012-11-07	MALE	NO				Thyroid Papillary Carcinoma	Tall Cell (>= 50% tall cell features)		No					C73	8344/3	C73.9	YES	100
TCGA-ET-A40P-01	TCGA-ET-A40P-01	NA	NA	NA	403	0	98	0	98	0	98	32	<55	<45	<45	lessthan55	lessthan45			-11843	371		0	98			None	None	Sibling		2012-09-30	FEMALE	NO				Thyroid Papillary Carcinoma	Follicular (>= 99% follicular patterned)		No					C73	8340/3	C73.9	YES	320
TCGA-ET-A40Q-01	TCGA-ET-A40Q-01	NA	NA	NA	404	0	218	0	218	0	218	38	<55	<45	<45	lessthan55	lessthan45			-14136	428		0	218			Minimal (T3)	Microscopic			2012-09-30	MALE	NO				Thyroid Papillary Carcinoma	Tall Cell (>= 50% tall cell features)		No					C73	8344/3	C73.9	YES	140
TCGA-ET-A40R-01	TCGA-ET-A40R-01	NA	NA	NA	405	0	146	0	146	0	146	24	<55	<45	<45	lessthan55	lessthan45			-8963	363		0	146			None	None			2012-09-30	FEMALE	NO				Thyroid Papillary Carcinoma	Follicular (>= 99% follicular patterned)		No					C73	8340/3	C73.9	YES	210
TCGA-ET-A40S-01	TCGA-ET-A40S-01	NA	NA	NA	406	0	153	0	153	0	153	62	>=55	>=55	>=45	over55	over45			-22733	240		0	153			None	None	Sibling		2012-09-30	MALE	NO				Thyroid Papillary Carcinoma	Classical/usual		No					C73	8260/3	C73.9	YES	50
TCGA-ET-A40T-01	TCGA-ET-A40T-01	NA	NA	NA	407	0	65	0	65	0	65	26	<55	<45	<45	lessthan55	lessthan45			-9531	156		0	65			None	None			2012-10-01	FEMALE	NO				Thyroid Papillary Carcinoma	Classical/usual		No					C73	8260/3	C73.9	YES	80
TCGA-ET-A4KN-01	TCGA-ET-A4KN-01	NA	NA	NA	408	0	122	0	122	0	122	51	<55	45~54	>=45	lessthan55	over45			-18889	108		0	122			Minimal (T3)	Microscopic			2013-01-08	FEMALE	NO				Thyroid Papillary Carcinoma	Tall Cell (>= 50% tall cell features)		No	49.7 millicuries			rhTSH	C73	8344/3	C73.9	YES	170
TCGA-ET-A4KQ-01	TCGA-ET-A4KQ-01	NA	NA	NA	409	0	59	0	59	0	59	45	<55	45~54	>=45	lessthan55	over45			-16685	51		0	59			None	None	Parent		2013-01-08	FEMALE	NO				Thyroid Papillary Carcinoma	Follicular (>= 99% follicular patterned)		No				Patient did not receive I-131 treatment	C73	8340/3	C73.9	YES	230
TCGA-FE-A22Z-01	TCGA-FE-A22Z-01	V600E	NA	NA	410	0	2243	0	2093	1	2243	61	>=55	>=55	>=45	over55	over45		1215	-22286	1526		0	2243	2120	2093	Moderate/Advanced (T4a)	Gross		Scheduled Follow-up Submission	2013-04-12	FEMALE	NO		NO		Thyroid Papillary Carcinoma	Follicular (>= 99% follicular patterned)		No	217 mCi		217 mCi	Patient did not receive I-131 treatment	C73	8340/3	C73.9	YES	130
TCGA-FE-A230-01	TCGA-FE-A230-01	V600E	NA	NA	411	0	1816	0	526	1	1816	30	<55	<45	<45	lessthan55	lessthan45		526	-10999	1669		0	1816		526	None	None		Scheduled Follow-up Submission	2012-03-30	FEMALE	NO				Thyroid Papillary Carcinoma	Classical/usual		No	150 mCi		150 mCi	Patient did not receive I-131 treatment	C73	8260/3	C73.9	YES	110
TCGA-FE-A231-01	TCGA-FE-A231-01	V600E	NA	NA	412	0	961	0	961	0	961	70	>=55	>=55	>=45	over55	over45			-25703	248		0	961			None	None		Scheduled Follow-up Submission	2013-04-11	MALE	NO				Thyroid Papillary Carcinoma	Classical/usual		No	124.7 mCi		124.7 mCi	rhTSH	C73	8260/3	C73.9	YES	140
TCGA-FE-A232-01	TCGA-FE-A232-01	V600E	NA	NA	413	0	1346	0	1346	0	1346	44	<55	<45	<45	lessthan55	lessthan45			-16280	1325		0	1346			Minimal (T3)	Microscopic		Scheduled Follow-up Submission	2012-03-30	FEMALE	NO				Thyroid Papillary Carcinoma	Classical/usual		No	200 mCi		200 mCi	rhTSH	C73	8260/3	C73.9	YES	130
TCGA-FE-A233-01	TCGA-FE-A233-01	V600E	NA	NA	414	0	751	0	567	1	751	18	<55	<45	<45	lessthan55	lessthan45		567	-6770	1340		0	751		567	None	None		Scheduled Follow-up Submission	2013-04-12	FEMALE	NO		NO		Thyroid Papillary Carcinoma	Classical/usual		No	100.1 mCi		100.1 mCi	Patient did not receive I-131 treatment	C73	8260/3	C73.9	YES	130
TCGA-FE-A234-01	TCGA-FE-A234-01	V600E	NA	NA	415	0	2075	0	2075	0	2075	26	<55	<45	<45	lessthan55	lessthan45		483	-9724	1340		0	2075		483	None	None		Scheduled Follow-up Submission	2013-04-12	FEMALE	NO		NO		Thyroid Papillary Carcinoma	Classical/usual		No	152 mCi		152 mCi	Patient did not receive I-131 treatment	C73	8260/3	C73.9	YES	130
TCGA-FE-A235-01	TCGA-FE-A235-01	V600E	NA	NA	416	0	3571	0	3571	0	3571	26	<55	<45	<45	lessthan55	lessthan45			-9859	3109		0	3571			None	None		Scheduled Follow-up Submission	2013-04-12	FEMALE	NO				Thyroid Papillary Carcinoma	Classical/usual		No	151		151	Thyroxine withdrawal	C73	8260/3	C73.9	YES	110
TCGA-FE-A236-01	TCGA-FE-A236-01	V600E	NA	NA	417	0	2031	0	2031	0	2031	33	<55	<45	<45	lessthan55	lessthan45			-12348	2465		0	2031			None	None		Scheduled Follow-up Submission	2013-04-12	MALE	NO				Thyroid Papillary Carcinoma	Classical/usual		No	152 mCi		152 mCi	Thyroxine withdrawal	C73	8260/3	C73.9	YES	110
TCGA-FE-A237-01	TCGA-FE-A237-01	V600E	NA	NA	418	0	2474	0	492	1	2474	19	<55	<45	<45	lessthan55	lessthan45		492	-7207	2173		0	2474		492	Minimal (T3)	Microscopic		Scheduled Follow-up Submission	2012-03-30	FEMALE	NO		NO		Thyroid Papillary Carcinoma	Classical/usual		No	156.4 mCi		156.4 mCi	Patient did not receive I-131 treatment	C73	8260/3	C73.9	YES	100
TCGA-FE-A238-01	TCGA-FE-A238-01	NA	NA	NA	419	0	1215	0	431	1	1215	36	<55	<45	<45	lessthan55	lessthan45			-13159			0	1215		431	Minimal (T3)	Microscopic		Scheduled Follow-up Submission	2013-04-12	FEMALE	NO				Thyroid Papillary Carcinoma	Classical/usual		No	153 mCi	151 mCi	304 mCi	rhTSH	C73	8260/3	C73.9	YES
TCGA-FE-A239-01	TCGA-FE-A239-01	NA	NA	NA	420	1	1023	1	933	1	1023	82	>=55	>=55	>=45	over55	over45			-30259	2039	1023	0			933	None	None		Scheduled Follow-up Submission	2012-03-30	MALE	NO		NO		Thyroid Papillary Carcinoma	Classical/usual		No	156.2 mCi		156.2 mCi	Patient did not receive I-131 treatment	C73	8260/3	C73.9	YES	110
TCGA-FE-A23A-01	TCGA-FE-A23A-01	V600E	NA	NA	421	0	2489	0	2489	0	2489	27	<55	<45	<45	lessthan55	lessthan45			-10177	1838		0	2489			None	None		Scheduled Follow-up Submission	2013-04-11	FEMALE	NO				Thyroid Papillary Carcinoma	Classical/usual		No	100.1 mCi		100.1 mCi	Thyroxine withdrawal	C73	8260/3	C73.9	YES	100
TCGA-FE-A3PA-01	TCGA-FE-A3PA-01	NA	NA	NA	422	0	3235	0	3235	0	3235	16	<55	<45	<45	lessthan55	lessthan45			-6068	3514		0	3235			Minimal (T3)	Microscopic			2013-04-10	MALE					Thyroid Papillary Carcinoma	Follicular (>= 99% follicular patterned)		No	217	217	434	Thyroxine withdrawal	C73	8340/3	C73.9	YES	70
TCGA-FE-A3PB-01	TCGA-FE-A3PB-01	V600E	NA	NA	423	0	2590	0			2590	33	<55	<45	<45	lessthan55	lessthan45			-12136	2906		0	2590			Minimal (T3)	Microscopic			2013-04-10	FEMALE					Thyroid Papillary Carcinoma	Classical/usual		No	126			Thyroxine withdrawal	C73	8260/3	C73.9	YES	80
TCGA-FE-A3PC-01	TCGA-FE-A3PC-01	V600E	NA	NA	424	0	2606	0	2606	0	2606	37	<55	<45	<45	lessthan55	lessthan45			-13817	2198		0	2606			None	None			2013-04-10	FEMALE	NO				Thyroid Papillary Carcinoma	Classical/usual		No	152			Thyroxine withdrawal	C73	8260/3	C73.9	YES	120
TCGA-FE-A3PD-01	TCGA-FE-A3PD-01	NA	NA	NA	425	0	2396	0	2396	0	2396	17	<55	<45	<45	lessthan55	lessthan45			-6386	2094		0	2396			None	None			2013-04-10	FEMALE					Thyroid Papillary Carcinoma	Follicular (>= 99% follicular patterned)		No	150			rhTSH	C73	8340/3	C73.9	YES	50
TCGA-FK-A3S3-01	TCGA-FK-A3S3-01	NA	NA	NA	426	0	2162	0	2162	0	2162	43	<55	<45	<45	lessthan55	lessthan45			-15853			0	2162			Minimal (T3)	Microscopic			2014-09-23	FEMALE					Thyroid Papillary Carcinoma	Follicular (>= 99% follicular patterned)		No	104.6 millicuries	197.8 millicuries	302.4	Thyroxine withdrawal	C73	8340/3	C73.9	YES
TCGA-FK-A3SB-01	TCGA-FK-A3SB-01	V600E	NA	NA	427	0	125	0	125	0	125	28	<55	<45	<45	lessthan55	lessthan45			-10293	1344		0	125			Minimal (T3)	Microscopic			2014-09-23	FEMALE	NO				Thyroid Papillary Carcinoma	Classical/usual		No				Patient did not receive I-131 treatment	C73	8260/3	C73.9	YES	40
TCGA-FK-A3SD-01	TCGA-FK-A3SD-01	NA	NA	NA	428	0	32	0	32	0	32	61	>=55	>=55	>=45	over55	over45			-22560	1072		0	32							2014-09-23	FEMALE	NO				Thyroid Papillary Carcinoma	Classical/usual		No				Patient did not receive I-131 treatment	C73	8260/3	C73.9	YES	140
TCGA-FK-A3SE-01	TCGA-FK-A3SE-01	NA	NA	NA	429	0	404	0	404	0	404	31	<55	<45	<45	lessthan55	lessthan45			-11472	1197		0	404			None	None			2014-09-23	FEMALE					Thyroid Papillary Carcinoma	Classical/usual		No	75.5 millicures		75.5 millicures	Thyroxine withdrawal	C73	8260/3	C73.9	YES	40
TCGA-FK-A3SG-01	TCGA-FK-A3SG-01	NA	NA	NA	430	0	28	0			28	21	<55	<45	<45	lessthan55	lessthan45			-7710	1444		0	28			None	None			2014-09-23	FEMALE					Thyroid Papillary Carcinoma	Classical/usual		No					C73	8260/3	C73.9	YES	30
TCGA-FK-A3SH-01	TCGA-FK-A3SH-01	V600E	NA	NA	431	0	1463	0	1463	0	1463	50	<55	45~54	>=45	lessthan55	over45			-18609	1338		0	1463			None	None	Parent		2014-09-23	FEMALE					Thyroid Papillary Carcinoma	Classical/usual		No	104.5 mCi		104.5 mCi	Thyroxine withdrawal	C73	8260/3	C73.9	YES	40
TCGA-FK-A4UB-01	TCGA-FK-A4UB-01	NA	NA	NA	432	0	3531	0	3531	0	3531	51	<55	45~54	>=45	lessthan55	over45			-18792	2822		0	3531			Minimal (T3)	Microscopic			2014-09-23	MALE	NO				Thyroid Papillary Carcinoma	Classical/usual		No	105 mCi		105 mCi	Thyroxine withdrawal	C73	8260/3	C73.9	YES	40
TCGA-FY-A2QD-01	TCGA-FY-A2QD-01	NA	NA	NA	433	0	38	0			38	61	>=55	>=55	>=45	over55	over45			-22491	170		0	38			None	None			2011-10-18	FEMALE	NO				Thyroid Papillary Carcinoma	Classical/usual		No					C73	8260/3	C73.9	YES	150
TCGA-FY-A3BL-01	TCGA-FY-A3BL-01	V600E	NA	NA	434	0	621	0	621	0	621	29	<55	<45	<45	lessthan55	lessthan45			-10667	92		0	621			None	None			2014-04-29	MALE					Thyroid Papillary Carcinoma	Classical/usual		No				Patient did not receive I-131 treatment	C73	8260/3	C73.9	YES	110
TCGA-FY-A3I4-01	TCGA-FY-A3I4-01	V600E	NA	NA	435	0	542	0	542	0	542	34	<55	<45	<45	lessthan55	lessthan45			-12677	92		0	542			None	None			2013-08-14	FEMALE					Thyroid Papillary Carcinoma	Classical/usual		No	72.5 mCi		72.5 mCi	rhTSH	C73	8260/3	C73.9	YES	60
TCGA-FY-A3I5-01	TCGA-FY-A3I5-01	NA	NA	NA	436	0	238	0	238	0	238	64	>=55	>=55	>=45	over55	over45			-23654	164		0	238			None	None			2014-09-30	FEMALE					Thyroid Papillary Carcinoma	Follicular (>= 99% follicular patterned)		No					C73	8340/3	C73.9	YES	210
TCGA-FY-A3NM-01	TCGA-FY-A3NM-01	NA	NA	NA	437	0	30	0			30	48	<55	45~54	>=45	lessthan55	over45			-17734	88		0	30			Minimal (T3)	Microscopic			2012-04-19	FEMALE					Thyroid Papillary Carcinoma	Classical/usual		No					C73	8260/3	C73.9	YES	60
TCGA-FY-A3NN-01	TCGA-FY-A3NN-01	V600E	NA	NA	438							48	<55	45~54	>=45	lessthan55	over45			-17613	56		0	0			None	None			2012-04-19	FEMALE					Thyroid Papillary Carcinoma	Classical/usual		No					C73	8260/3	C73.9	YES	13
TCGA-FY-A3NP-01	TCGA-FY-A3NP-01	NA	NA	Q61R	439	0	491	0	491	0	491	69	>=55	>=55	>=45	over55	over45			-25462			0	491			None	None			2013-04-30	MALE					Thyroid Papillary Carcinoma	Follicular (>= 99% follicular patterned)		No	121.9 mCi		121.9 mCi	rhTSH	C73	8340/3	C73.9	YES
TCGA-FY-A3ON-01	TCGA-FY-A3ON-01	V600E	NA	NA	440	0	595	0	595	0	595	20	<55	<45	<45	lessthan55	lessthan45			-7403	71		0	595			None	None			2014-04-29	MALE					Thyroid Papillary Carcinoma	Classical/usual		No	100.9 mCi		100.9 mCi	rhTSH	C73	8260/3	C73.9	YES	190
TCGA-FY-A3R6-01	TCGA-FY-A3R6-01	NA	NA	NA	441	0	423	0	423	0	423	57	>=55	>=55	>=45	over55	over45			-21009	101		0	423			None	None			2014-10-03	FEMALE					Thyroid Papillary Carcinoma	Classical/usual		No					C73	8260/3	C73.9	YES	7
TCGA-FY-A3R7-01	TCGA-FY-A3R7-01	V600E	NA	NA	442	0	495	0	495	0	495	50	<55	45~54	>=45	lessthan55	over45			-18403	27		0	495			Minimal (T3)	Microscopic			2014-10-03	FEMALE					Thyroid Papillary Carcinoma	Classical/usual		No					C73	8260/3	C73.9	YES	19
TCGA-FY-A3R8-01	TCGA-FY-A3R8-01	V600E	NA	NA	443	0	477	0	477	0	477	62	>=55	>=55	>=45	over55	over45			-22824	51		0	477			Minimal (T3)	Microscopic			2014-08-25	FEMALE					Thyroid Papillary Carcinoma	Classical/usual		No	113.9		113.9	rhTSH	C73	8260/3	C73.9	YES	70
TCGA-FY-A3R9-01	TCGA-FY-A3R9-01	NA	NA	Q61K	444	0	504	0	504	0	504	66	>=55	>=55	>=45	over55	over45			-24215	121		0	504			None	None			2013-04-30	FEMALE					Thyroid Papillary Carcinoma	Classical/usual		No				Patient did not receive I-131 treatment	C73	8340/3	C73.9	YES	60
TCGA-FY-A3RA-01	TCGA-FY-A3RA-01	V600E	NA	NA	445	0	550	0	550	0	550	21	<55	<45	<45	lessthan55	lessthan45			-7900	181		0	550			None	None			2013-04-30	FEMALE					Thyroid Papillary Carcinoma	Classical/usual		No	101.4 mCi		101.4 mCi	rhTSH	C73	8260/3	C73.9	YES	40
TCGA-FY-A3TY-01	TCGA-FY-A3TY-01	NA	NA	NA	446	0	9	0	9	0	9	61	>=55	>=55	>=45	over55	over45			-22556	49		0	9			Minimal (T3)	Microscopic			2012-08-06	FEMALE					Thyroid Papillary Carcinoma	Classical/usual		No					C73	8260/3	C73.9	YES	160
TCGA-FY-A3W9-01	TCGA-FY-A3W9-01	NA	NA	Q61R	447	0	23	0	23	0	23	66	>=55	>=55	>=45	over55	over45			-24136	72		0	23			None	None			2012-10-08	FEMALE					Thyroid Papillary Carcinoma	Follicular (>= 99% follicular patterned)		No					C73	8340/3	C73.9	YES	190
TCGA-FY-A3WA-01	TCGA-FY-A3WA-01	NA	NA	NA	448	0	519	0	519	0	519	52	<55	45~54	>=45	lessthan55	over45			-18993	71		0	519			None	None			2013-08-28	FEMALE					Thyroid Papillary Carcinoma	Follicular (>= 99% follicular patterned)		No				Patient did not receive I-131 treatment	C73	8340/3	C73.9	YES	200
TCGA-FY-A3YR-01	TCGA-FY-A3YR-01	NA	NA	NA	449	0	528	0	528	0	528	64	>=55	>=55	>=45	over55	over45			-23395	122		0	528			Minimal (T3)	Microscopic			2014-03-27	FEMALE					Thyroid Papillary Carcinoma	Classical/usual		No	151.2		151.2	rhTSH	C73	8260/3	C73.9	YES	70
TCGA-FY-A40K-01	TCGA-FY-A40K-01	V600E	NA	NA	450	0	461	0	461	0	461	46	<55	45~54	>=45	lessthan55	over45			-17092	58		0	461			None	None			2014-08-25	FEMALE					Thyroid Papillary Carcinoma	Classical/usual		No	75.2		75.2	rhTSH	C73	8260/3	C73.9	YES	30
TCGA-FY-A40L-01	TCGA-FY-A40L-01	NA	NA	NA	451	0	200	0	200	0	200	55	>=55	>=55	>=45	over55	over45			-20243	132		0	200			Moderate/Advanced (T4a)	Gross			2012-10-08	FEMALE					Thyroid Papillary Carcinoma	Classical/usual		No	147.6 mCi		147.6 mCi	rhTSH	C73	8260/3	C73.9	YES	170
TCGA-FY-A40M-01	TCGA-FY-A40M-01	NA	NA	NA	452	0	684	0	684	0	684	51	<55	45~54	>=45	lessthan55	over45			-18722	70		0	684			None	None			2014-05-29	FEMALE					Thyroid Papillary Carcinoma	Classical/usual		No	50.8		50.8	rhTSH	C73	8260/3	C73.9	YES	160
TCGA-FY-A40N-01	TCGA-FY-A40N-01	Fusion	NA	NA	453	0	579	0	579	0	579	55	>=55	>=55	>=45	over55	over45			-20320			0	579			None	None			2014-05-29	FEMALE					Thyroid Papillary Carcinoma	Follicular (>= 99% follicular patterned)		No				Patient did not receive I-131 treatment	C73	8340/3	C73.9	YES
TCGA-FY-A4B0-01	TCGA-FY-A4B0-01	NA	NA	NA	454							76	>=55	>=55	>=45	over55	over45			-27946	72		0	0			None	None			2013-02-21	MALE					Thyroid Papillary Carcinoma	Classical/usual		No					C73	8340/3	C73.9	YES	90
TCGA-FY-A4B3-01	TCGA-FY-A4B3-01	V600E	NA	NA	455	0	41	0	41	0	41	51	<55	45~54	>=45	lessthan55	over45			-18969	62		0	41			Minimal (T3)	Microscopic			2013-02-21	MALE					Thyroid Papillary Carcinoma	Classical/usual		No					C73	8260/3	C73.9	YES	60
TCGA-FY-A4B4-01	TCGA-FY-A4B4-01	NA	NA	NA	456	0	657	0	657	0	657	62	>=55	>=55	>=45	over55	over45			-22830	104		0	657			None	None			2014-05-29	FEMALE					Thyroid Papillary Carcinoma	Classical/usual		No	54.4		54.4	rhTSH	C73	8260/3	C73.9	YES	50
TCGA-FY-A76V-01	TCGA-FY-A76V-01	NA	NA	NA	457	0	51	0	51	0	51	54	<55	45~54	>=45	lessthan55	over45			-19872	136		0	51			None	None			2014-02-26	MALE					Thyroid Papillary Carcinoma	Classical/usual		No					C73	8260/3	C73.9	YES	30
TCGA-GE-A2C6-01	TCGA-GE-A2C6-01	V600E	NA	NA	458	0	206	0	206	0	206	33	<55	<45	<45	lessthan55	lessthan45			-12068	57		0	206			None	None		Scheduled Follow-up Submission	2012-02-17	FEMALE	NO				Thyroid Papillary Carcinoma	Classical/usual		No					C73	8260/3	C73.9	YES	90
TCGA-H2-A26U-01	TCGA-H2-A26U-01	V600E	NA	NA	459	0	517	0	517	0	517	54	<55	45~54	>=45	lessthan55	over45			-19927	27		0	517			Minimal (T3)	Microscopic	Child	Scheduled Follow-up Submission	2013-01-28	FEMALE					Thyroid Papillary Carcinoma	Classical/usual		No	100.7 mCi		100.7 mCi	Thyroxine withdrawal	C73	8260/3	C73.9	YES	80
TCGA-H2-A2K9-01	TCGA-H2-A2K9-01	NA	NA	Q61R	460	0	659	0	659	0	659	25	<55	<45	<45	lessthan55	lessthan45			-9221	127		0	659			None	None		Scheduled Follow-up Submission	2013-03-28	MALE					Thyroid Papillary Carcinoma	Classical/usual		No	152.3 mCi		152.3 mCi	Thyroxine withdrawal	C73	8260/3	C73.9	YES	260
TCGA-H2-A3RH-01	TCGA-H2-A3RH-01	NA	NA	NA	461	0	379	0	379	0	379	41	<55	<45	<45	lessthan55	lessthan45			-15068	114		0	379			None	None			2012-12-21	FEMALE					Thyroid Papillary Carcinoma	Follicular (>= 99% follicular patterned)		No	107 mCi		107 mCi	rhTSH	C73	8340/3	C73.9	YES	90
TCGA-H2-A3RI-01	TCGA-H2-A3RI-01	V600E	NA	NA	462	0	91	0			91	29	<55	<45	<45	lessthan55	lessthan45			-10956	71		0	91			Minimal (T3)	Microscopic			2012-05-07	FEMALE					Thyroid Papillary Carcinoma	Classical/usual		No					C73	8260/3	C73.9	YES	170
TCGA-H2-A421-01	TCGA-H2-A421-01	V600E	NA	NA	463	0	349	0	349	0	349	34	<55	<45	<45	lessthan55	lessthan45			-12657	14		0	349			None	None			2013-07-16	FEMALE					Thyroid Papillary Carcinoma	Classical/usual		No	105.6			Thyroxine withdrawal	C73	8260/3	C73.9	YES	30
TCGA-H2-A422-01	TCGA-H2-A422-01	NA	NA	NA	464	0	371	0	371	0	371	40	<55	<45	<45	lessthan55	lessthan45			-14721	14		0	371			None	None			2013-07-16	FEMALE					Thyroid Papillary Carcinoma	Classical/usual		No	100.1 mCi		100.1 mCi	Thyroxine withdrawal	C73	8260/3	C73.9	YES	90
TCGA-IM-A3EB-01	TCGA-IM-A3EB-01	V600E	NA	NA	465	0	1488	0	1488	0	1488	32	<55	<45	<45	lessthan55	lessthan45			-11822	1055		0	1488			Minimal (T3)	Microscopic			2013-01-15	FEMALE					Thyroid Papillary Carcinoma	Classical/usual		No	154 mCi		154 mCi	rhTSH	C73	8260/3	C73.9	YES	240
TCGA-IM-A3ED-01	TCGA-IM-A3ED-01	V600E	NA	NA	466	0	1442	0	1442	0	1442	58	>=55	>=55	>=45	over55	over45			-21278	1106		0	1442			None	None			2013-01-08	FEMALE	NO				Thyroid Papillary Carcinoma	Classical/usual		No					C73	8260/3	C73.9	YES	90
TCGA-IM-A3U2-01	TCGA-IM-A3U2-01	V600E	NA	NA	467	0	312	0	312	0	312	89	>=55	>=55	>=45	over55	over45			-32682	35		0	312			Minimal (T3)	Microscopic			2013-03-06	FEMALE	NO				Thyroid Papillary Carcinoma	Tall Cell (>= 50% tall cell features)		No				Patient did not receive I-131 treatment	C73	8344/3	C73.9	YES	80
TCGA-IM-A3U3-01	TCGA-IM-A3U3-01	V600E	NA	NA	468	0	514	0	514	0	514	55	>=55	>=55	>=45	over55	over45			-20117			0	514			None	None			2013-03-06	FEMALE	NO				Thyroid Papillary Carcinoma	Tall Cell (>= 50% tall cell features)		No				rhTSH	C73	8344/3	C73.9	YES
TCGA-IM-A41Y-01	TCGA-IM-A41Y-01	NA	NA	NA	469	0	664	0	664	0	664	42	<55	<45	<45	lessthan55	lessthan45			-15694	90		0	664			Minimal (T3)	Microscopic			2014-03-28	FEMALE	NO				Other specify		Diffuse sclerosing variant	No	205 mCi			rhTSH	C73	8350/3	C73.9	YES	90
TCGA-IM-A41Z-01	TCGA-IM-A41Z-01	NA	NA	NA	470	0	293	0	293	0	293	37	<55	<45	<45	lessthan55	lessthan45			-13704	106		0	293			None	None			2013-02-01	FEMALE					Thyroid Papillary Carcinoma	Follicular (>= 99% follicular patterned)		No	102 mCi			rhTSH	C73	8340/3	C73.9	YES	40
TCGA-IM-A420-01	TCGA-IM-A420-01	NA	NA	NA	471	0	90	0	90	0	90	39	<55	<45	<45	lessthan55	lessthan45			-14332	56		0	90			None	None			2013-02-01	FEMALE					Thyroid Papillary Carcinoma	Classical/usual		No				Patient did not receive I-131 treatment	C73	8260/3	C73.9	YES	80
TCGA-IM-A4EB-01	TCGA-IM-A4EB-01	NA	NA	NA	472	0	263	0	263	0	263	37	<55	<45	<45	lessthan55	lessthan45			-13635	121		0	263			Minimal (T3)	Microscopic			2013-03-06	MALE					Other specify		Diffuse Sclerosing Variant	No	149.8 mCi			rhTSH	C73	8350/3	C73.9	YES	50
TCGA-J8-A3NZ-01	TCGA-J8-A3NZ-01	V600E	NA	NA	473	0	524	0	524	0	524	52	<55	45~54	>=45	lessthan55	over45			-19058	96		0	524			Minimal (T3)	Microscopic			2013-04-02	FEMALE	NO				Thyroid Papillary Carcinoma	Classical/usual		No	98.1 millicuries		98.1	Thyroxine withdrawal	C73	8260/3	C73.9	YES	120
TCGA-J8-A3O0-01	TCGA-J8-A3O0-01	NA	NA	Q61R	474	0	1313	0	1313	0	1313	38	<55	<45	<45	lessthan55	lessthan45			-14214	874		0	1313			None	None			2013-04-02	MALE	NO				Thyroid Papillary Carcinoma	Classical/usual		No				Patient did not receive I-131 treatment	C73	8340/3	C73.9	YES	150
TCGA-J8-A3O1-01	TCGA-J8-A3O1-01	Fusion	NA	NA	475	0	827	0	827	0	827	33	<55	<45	<45	lessthan55	lessthan45	Negative		-12113	575		0	827			None	None			2013-03-25	FEMALE	NO	No BRAF Mutation Detected			Thyroid Papillary Carcinoma	Classical/usual		No	152 mCi		152 mCi	Thyroxine withdrawal	C73	8260/3	C73.9	YES	490
TCGA-J8-A3O2-01	TCGA-J8-A3O2-01	NA	NA	NA	476	0	342	0	342	0	342	39	<55	<45	<45	lessthan55	lessthan45			-14339	89		0	342			Minimal (T3)	Microscopic			2013-03-25	MALE	NO				Thyroid Papillary Carcinoma	Classical/usual		No	151 mCi		151 mCi	Thyroxine withdrawal	C73	8260/3	C73.9	YES	230
TCGA-J8-A3YD-01	TCGA-J8-A3YD-01	NA	NA	NA	477	0	968	0	968	0	968	47	<55	45~54	>=45	lessthan55	over45	negative		-17416	1045		0	968			None	None			2012-09-26	FEMALE	NO	No BRAF Mutation Detected			Thyroid Papillary Carcinoma	Classical/usual		No	152 millicuries		152 millicuries	Thyroxine withdrawal	C73	8260/3	C73.9	YES	40
TCGA-J8-A3YE-01	TCGA-J8-A3YE-01	V600E	NA	NA	478	0	847	0	847	0	847	31	<55	<45	<45	lessthan55	lessthan45			-11446	856		0	847			Minimal (T3)	Microscopic			2012-09-27	FEMALE	NO				Thyroid Papillary Carcinoma	Classical/usual		No	142.5		142.5	Thyroxine withdrawal	C73	8260/3	C73.9	YES	80
TCGA-J8-A3YF-01	TCGA-J8-A3YF-01	NA	NA	NA	479	0	751	0	751	0	751	83	>=55	>=55	>=45	over55	over45	Negative		-30661	1038		0	751			None	None			2012-12-03	MALE	NO	No BRAF Mutation Detected			Thyroid Papillary Carcinoma	Classical/usual		No	156 mCi		156 mCi	Thyroxine withdrawal	C73	8260/3	C73.9	YES	110
TCGA-J8-A3YG-01	TCGA-J8-A3YG-01	NA	NA	NA	480	0	678	0	678	0	678	54	<55	45~54	>=45	lessthan55	over45	positive		-19785	609		0	678			None	None			2012-09-26	FEMALE	YES				Thyroid Papillary Carcinoma	Classical/usual		No	157 millicuries		157 millicuries	Thyroxine withdrawal	C73	8260/3	C73.9	YES	60
TCGA-J8-A3YH-01	TCGA-J8-A3YH-01	NA	NA	NA	481	0	175	0	175	0	175	39	<55	<45	<45	lessthan55	lessthan45			-14470	93		0	175			None	None			2012-12-03	MALE	NO				Thyroid Papillary Carcinoma	Classical/usual		No	155 millicuries		155 millicuries	Thyroxine withdrawal	C73	8260/3	C73.9	YES	140
TCGA-J8-A42S-01	TCGA-J8-A42S-01	NA	NA	NA	482	0	75	0	75	0	75	45	<55	45~54	>=45	lessthan55	over45			-16609	98		0	75			None	None			2012-12-03	MALE	NO				Thyroid Papillary Carcinoma	Classical/usual		No				Patient did not receive I-131 treatment	C73	8260/3	C73.9	YES	100
TCGA-J8-A4HW-01	TCGA-J8-A4HW-01	NA	NA	NA	483	0	79	0	79	0	79	59	>=55	>=55	>=45	over55	over45			-21587	31		0	79			None	None	Parent		2013-03-09	FEMALE					Thyroid Papillary Carcinoma	Classical/usual		No	102.4 millicuries		102.4 millicuries	rhTSH	C73	8260/3	C73.9	YES	80
TCGA-J8-A4HY-01	TCGA-J8-A4HY-01	NA	NA	NA	484	0	6	0	6	0	6	68	>=55	>=55	>=45	over55	over45			-25106	45		0	6			Moderate/Advanced (T4a)	Gross			2013-03-11	FEMALE	NO				Thyroid Papillary Carcinoma	Classical/usual		No					C73	8260/3	C73.9	YES	180
TCGA-KS-A41F-01	TCGA-KS-A41F-01	NA	NA	NA	485	0	4367	0	4367	0	4367	37	<55	<45	<45	lessthan55	lessthan45			-13545	3703		0	4367			None	None			2014-05-13	FEMALE					Thyroid Papillary Carcinoma	Classical/usual		No	119 mCi		119 mCi		C73	8260/3	C73.9	YES	130
TCGA-KS-A41I-01	TCGA-KS-A41I-01	NA	NA	NA	486	0	486	0	486	0	486	47	<55	45~54	>=45	lessthan55	over45			-17196	3832		0	486			None	None			2012-12-10	FEMALE					Thyroid Papillary Carcinoma	Follicular (>= 99% follicular patterned)		No					C73	8340/3	C73.9	YES	60
TCGA-KS-A41J-01	TCGA-KS-A41J-01	V600E	NA	NA	487	0	477	0	477	0	477	28	<55	<45	<45	lessthan55	lessthan45			-10411	4417		0	477			None	None			2012-12-10	FEMALE					Thyroid Papillary Carcinoma	Classical/usual		No					C73	8260/3	C73.9	YES	80
TCGA-KS-A41L-01	TCGA-KS-A41L-01	NA	NA	NA	488	0	2637	0	2637	0	2637	39	<55	<45	<45	lessthan55	lessthan45			-14440	2800		0	2637			None	None			2012-12-10	FEMALE					Thyroid Papillary Carcinoma	Follicular (>= 99% follicular patterned)		No					C73	8340/3	C73.9	YES	50
TCGA-KS-A4I1-01	TCGA-KS-A4I1-01	NA	NA	NA	489	0	183	0	183	0	183	37	<55	<45	<45	lessthan55	lessthan45			-13538	239		0	183			None	None			2013-01-14	FEMALE					Thyroid Papillary Carcinoma	Classical/usual		No	150 mCi			Thyroxine withdrawal	C73	8260/3	C73.9	YES	60
TCGA-KS-A4I3-01	TCGA-KS-A4I3-01	NA	NA	NA	490	0	600	0	600	0	600	41	<55	<45	<45	lessthan55	lessthan45			-14992	413		0	600			Minimal (T3)	Microscopic			2014-05-13	MALE					Thyroid Papillary Carcinoma	Classical/usual		No	150 mCi		150 mCi	Thyroxine withdrawal	C73	8260/3	C73.9	YES	60
TCGA-KS-A4I5-01	TCGA-KS-A4I5-01	V600E	NA	NA	491	0	205	0	205	0	205	49	<55	45~54	>=45	lessthan55	over45			-17963	315		0	205			None	None			2013-01-14	FEMALE					Thyroid Papillary Carcinoma	Classical/usual		No	150 mCi				C73	8260/3	C73.9	YES	110
TCGA-KS-A4I7-01	TCGA-KS-A4I7-01	NA	NA	NA	492	0	987	0	987	0	987	61	>=55	>=55	>=45	over55	over45			-22398	399		0	987			None	None			2014-05-13	FEMALE					Thyroid Papillary Carcinoma	Classical/usual		No	30 mCi		30 mCi	Thyroxine withdrawal	C73	8260/3	C73.9	YES	80
TCGA-KS-A4I9-01	TCGA-KS-A4I9-01	V600E	NA	NA	493	0	2658	0	2658	0	2658	46	<55	45~54	>=45	lessthan55	over45			-16961	2064		0	2658			None	None			2014-05-13	FEMALE					Thyroid Papillary Carcinoma	Classical/usual		No	30 mCi		30 mCi		C73	8260/3	C73.9	YES	80
TCGA-KS-A4IB-01	TCGA-KS-A4IB-01	V600E	NA	NA	494	0	2577	0	2577	0	2577	41	<55	<45	<45	lessthan55	lessthan45			-15157	2022		0	2577			None	None			2014-05-13	FEMALE					Thyroid Papillary Carcinoma	Classical/usual		No	30 mCi		30 mCi		C73	8260/3	C73.9	YES	170
TCGA-KS-A4IC-01	TCGA-KS-A4IC-01	NA	NA	NA	495	0	1073	0	1073	0	1073	45	<55	45~54	>=45	lessthan55	over45			-16671	490		0	1073			None	None			2014-05-13	FEMALE					Thyroid Papillary Carcinoma	Classical/usual		No	50 mCi		50 mCi		C73	8260/3	C73.9	YES	40
TCGA-KS-A4ID-01	TCGA-KS-A4ID-01	Fusion	NA	NA	496	0	1011	0	1011	0	1011	55	>=55	>=55	>=45	over55	over45			-20413	702		0	1011			None	None			2014-05-14	FEMALE					Thyroid Papillary Carcinoma	Follicular (>= 99% follicular patterned)		No				Patient did not receive I-131 treatment	C73	8340/3	C73.9	YES	50
TCGA-L6-A4EP-01	TCGA-L6-A4EP-01	V600E	NA	NA	497	0	1016	0	1016	0	1016	41	<55	<45	<45	lessthan55	lessthan45			-15292	697		0	1016			None	None			2014-01-24	FEMALE	NO				Thyroid Papillary Carcinoma	Classical/usual		No	30 mci		30 mci	rhTSH	C73	8260/3	C73.9	YES	170
TCGA-L6-A4EQ-01	TCGA-L6-A4EQ-01	NA	NA	NA	498	0	1228	0	1228	0	1228	47	<55	45~54	>=45	lessthan55	over45			-17351	847		0	1228			None	None			2014-01-24	MALE	NO				Thyroid Papillary Carcinoma	Classical/usual		No	109 mci		109 mci	Thyroxine withdrawal	C73	8260/3	C73.9	YES	370
TCGA-L6-A4ET-01	TCGA-L6-A4ET-01	V600E	NA	NA	499	0	664	0	664	0	664	49	<55	45~54	>=45	lessthan55	over45			-17978	282		0	664			None	None			2014-01-24	FEMALE	NO				Thyroid Papillary Carcinoma	Follicular (>= 99% follicular patterned)		No	156.5 mci		156.5 mci	Thyroxine withdrawal	C73	8340/3	C73.9	YES	230
TCGA-L6-A4EU-01	TCGA-L6-A4EU-01	V600E	NA	NA	500	0	289	0	289	0	289	58	>=55	>=55	>=45	over55	over45			-21192	88		0	289			Minimal (T3)	Microscopic			2014-01-24	FEMALE	NO				Thyroid Papillary Carcinoma	Tall Cell (>= 50% tall cell features)		No	104.1 mci		104.1 mci	Thyroxine withdrawal	C73	8344/3	C73.9	YES	130
TCGA-MK-A4N6-01	TCGA-MK-A4N6-01	V600E	NA	NA	501	0	1098	0	1098	0	1098	35	<55	<45	<45	lessthan55	lessthan45			-12904	589		0	1098							2014-03-07	MALE	NO				Thyroid Papillary Carcinoma	Classical/usual		No	144 mCi			Thyroxine withdrawal	C73	8260/3	C73.9	YES	80
TCGA-MK-A4N7-01	TCGA-MK-A4N7-01	V600E	NA	NA	502	0	987	0	987	0	987	20	<55	<45	<45	lessthan55	lessthan45			-7570			0	987			None	None			2014-03-07	FEMALE	NO				Thyroid Papillary Carcinoma	Classical/usual		No	100mCi			Thyroxine withdrawal	C73	8260/3	C73.9	YES
TCGA-MK-A4N9-01	TCGA-MK-A4N9-01	V600E	NA	NA	503	0	919	0	919	0	919	41	<55	<45	<45	lessthan55	lessthan45			-15255	447		0	919			Minimal (T3)	Microscopic			2014-03-10	FEMALE	NO				Thyroid Papillary Carcinoma	Classical/usual		No	123.3 mCi			Thyroxine withdrawal	C73	8260/3	C73.9	YES	150
TCGA-MK-A84Z-01	TCGA-MK-A84Z-01	NA	NA	NA	504	0	334	0	334	0	334	74	>=55	>=55	>=45	over55	over45			-27185	178		0	334							2014-03-10	MALE					Thyroid Papillary Carcinoma	Follicular (>= 99% follicular patterned)		No					C73	8340/3	C73.9	YES	60
TCGA-QD-A8IV-01	TCGA-QD-A8IV-01	NA	NA	NA	505	0	392	0	392	0	392	50	<55	45~54	>=45	lessthan55	over45	POSITIVE for V600E mutation of BRAF (c.1799T>A, p.Val600Glu).		-18288	42		0	392			Minimal (T3)	Microscopic			2014-10-30	FEMALE	YES				Thyroid Papillary Carcinoma	Classical/usual		No	5.52	124.3	129.3		C73	8260/3	C73.9	YES	270
[truncated: 88 more columns]
